# Supplementary material for: Reaction of indoles with aromatic fluoromethyl ketones: an efficient synthesis of trifluoromethyl(indolyl)phenylmethanols using K 2 CO 3 / n- Bu 4 PBr in water
Source: publisher site journal article supplement (doi:10.3762/bjoc.16.71), 2020-04-20
Supplement: Additional file 1 [file 1860-5397-16-71-S1.pdf]

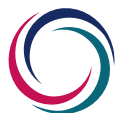

## Supporting Information

for

### **Reaction of indoles with aromatic fluoromethyl ketones: an efficient synthesis of trifluoromethyl(indolyl)phenylmethanols using $K_2CO_3/n\text{-Bu}_4PBr$ in water**

Thanigaimalai Pillaiyar, Masoud Sedaghati and Gregor Schnakenburg

*Beilstein J. Org. Chem.* **2020**, *16*, 778–790. [doi:10.3762/bjoc.16.71](https://doi.org/10.3762/bjoc.16.71)

## Experimental and analytical data

| Entry No: | Table of Contents                                                                   | Page    |
|-----------|-------------------------------------------------------------------------------------|---------|
| 1         | Materials and methods: general information                                          | S2      |
| 2         | General procedures for the synthesis of <b>3a–l</b> , <b>3m–o</b>                   | S3      |
| 3         | Procedure for the synthesis of <b>9</b>                                             | S3      |
| 4         | Procedure for the synthesis of <b>10</b>                                            | S3      |
| 5         | Procedure for the synthesis of <b>11</b>                                            | S4      |
| 6         | Spectrochemical data                                                                | S4–S17  |
| 7         | X-ray crystal structure determination                                               | S18     |
| 8         | <b>Figure S1.</b> ORTEP-type plot of the molecular structure of <b>3a</b>           | S19     |
| 9         | <b>Table S1.</b> Crystal data and structure refinement for <b>3a</b>                | S20     |
| 10        | <b>Table S2.</b> Bond lengths for <b>3a</b>                                         | S21     |
| 11        | <b>Table S3.</b> Bond angles for <b>3a</b>                                          | S22     |
| 12        | <b>Figures S2–S25.</b> <sup>1</sup> H and <sup>13</sup> C NMR spectrum of compounds | S23–S46 |
| 13        | References                                                                          | S47     |

## Materials and methods

### Experimental Section

**General information:** Chemicals were purchased from Merck (Darmstadt, Germany), ABCR (Karlsruhe, Germany), or TCI (Eschborn, Germany). Thin layer chromatography (TLC) was performed on TLC plates F254 (Merck) and analyzed using UV light. An LCMS instrument coupled to electrospray ionization mass spectrometry (LCESI-MS) determined the purities of isolated products using the following procedure: the compounds were dissolved at a concentration of 1.0 mg/mL in acetonitrile, containing 2 mM  $\text{NH}_4\text{CH}_3\text{COO}$ . Then, 10  $\mu\text{L}$  of the sample was injected into an HPLC column (Phenomenex Luna 3  $\mu$  C18, 50  $\times$  2.00 mm). Elution was performed with a gradient of water: methanol (containing 2 mM  $\text{NH}_4\text{CH}_3\text{COO}$ ) from 90:10 to 0:100 starting the gradient immediately at a flow rate of 250  $\mu\text{L}/\text{min}$  for 15 min followed by washing with 100% methanol for another 15 min. UV absorption was detected from 200 to 600 nm using a diode array detector (DAD). The purity of the compounds was determined at 220–400 nm and was  $\geq 95\%$  for all products.  $^1\text{H}$ ,  $^{13}\text{C}$  and  $^{19}\text{F}$  NMR data were measured in  $\text{CDCl}_3$  or  $\text{DMSO}-d_6$  as a solvent. Chemical shifts are reported in parts per million (ppm) relative to the deuterated solvents ( $\text{DMSO}-d_6$ ),  $^1\text{H}$ : 2.49 ppm,  $^{13}\text{C}$ : 39.70 ppm; ( $\text{CDCl}_3$ )  $^1\text{H}$ : 7.25 ppm,  $^{13}\text{C}$ : 77.17 ppm; coupling constants  $J$  are given in Hertz and spin multiplicities are given as s (singlet), d (doublet), t (triplet), q (quartet), sext (sextet), m (multiplet), br (broad). HRMS was recorded on a micrOTOF-Q mass spectrometer (Bruker) with ESI-source coupled with an HPLC Dionex Ultimate 3000 (Thermo Scientific) using an EC 50/2 Nucleodur C18 Gravity 3  $\mu\text{m}$  column (MachereyNagel). The column temperature was 425  $^\circ\text{C}$ . Ca. 1  $\mu\text{L}$  of a 1 mg/mL solution of the sample in acetonitrile was injected and a flow rate of 0.3 mL/min was used. HPLC was started with a solution of acetonitrile in water (10:90), containing 2 mM  $\text{CH}_3\text{COONH}_4$ . The gradient was started after 1 min reaching 100% acetonitrile within 9 min and then flushed with this concentration for another 5 min. Melting points were measured on a melting point apparatus (BÜCHI melting point B-545) and are uncorrected.

### General procedures for the Synthesis of 3a–I, 3m–o

The solution of 5-methoxyindole (**1a**, 3.4 mmol) and 2,2,2-trifluoro-1-phenylethan-1-one (**2a**, 3.70 mmol) was prepared in water (5 mL) and allowed it to stir at room temperature. To the solution, K<sub>2</sub>CO<sub>3</sub> (0.5 mmol) and *n*-Bu<sub>4</sub>PBr (0.5 mmol) were added. Initially, the mixture was allowed to stir vigorously due to the formation product in sticky mass. After keep stirring for a long time, the sticky mass was turned to be solid, which can be filtered through glass filter (pore size 5, 50 mL) and washed with 5% ethyl acetate in petroleum ether (boiling in the range 35–60 °C). The product was dried at 40 °C in a heating oven for further spectroscopic and physical characterizations.

### Procedure for the synthesis of 9

To a solution of 2,2,2-trifluoro-1-(5-methoxy-1*H*-indol-3-yl)-1-phenylethan-1-ol (**3a**, (0.6 mmol) and indole (**1b**, 0.71 mmol) in CH<sub>3</sub>CN (5 mL) was added Ga(OTf)<sub>3</sub> (0.06 mmol). The mixture was allowed to stir at room temperature for 24 h. The reaction mixture was evaporated under reduced pressure to dryness and resulting residue was purified by silica-gel column chromatography to give the desired product.

### Procedure for the synthesis of 10

To a solution of 2,2,2-trifluoro-1-(5-methoxy-1*H*-indol-3-yl)-1-phenylethan-1-ol (**3a**, (0.6 mmol) and 2-phenylindole (**1k**, 0.71 mmol) in CH<sub>3</sub>CN (5 mL) was added Ga(OTf)<sub>3</sub> (0.06 mmol). The mixture was allowed to stir at 80 °C for 24 h. The reaction mixture was evaporated under reduced pressure to dryness and resulting residue was purified by silica-gel column chromatography to give the desired product.

### Procedure for the synthesis of 11

To a solution of 2,2,2-trifluoro-1-(5-methoxy-1*H*-indol-3-yl)-1-phenylethan-1-ol (**3a**, 0.6 mmol) in CHCl<sub>3</sub> (2 mL) were added 5-fluoroindole (**1e**, 0.75 mmol) and trifluoroacetic acid (10 mol %) at rt. The reaction mixture was stirred until the disappearance of alcohol derivatives as observed by TLC. The reaction mixture was quenched with an aqueous saturated NaHCO<sub>3</sub> solution (5 mL) and the organic layer was separated. The aqueous layer was extracted with chloroform (3 × 20 mL). The combined organic layer was dried with anhydrous Na<sub>2</sub>SO<sub>4</sub> and then evaporated. The residue was purified by column chromatography.

### 2,2,2-Trifluoro-1-(5-methoxy-1*H*-indol-3-yl)-1-phenylethan-1-ol (**3a**)<sup>[1]</sup>

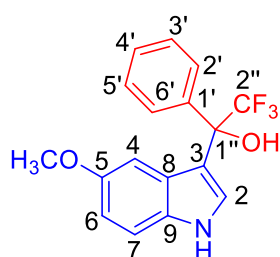

5-Methoxyindole (**1a**, 3.4 mmol), 2,2,2-trifluoro-1-phenylethan-1-one (**2a**, 3.70 mmol), K<sub>2</sub>CO<sub>3</sub> (15 mol %), and *n*-Bu<sub>4</sub>PBr (15 mol %) were used for this reaction in water (5 mL). Orange solid; yield: >99% (1.10 g); mp = 135-136 °C (135).<sup>[1]</sup> <sup>1</sup>H NMR (600 MHz, DMSO-*d*<sub>6</sub>) δ 11.06 (d, *J* = 2.9 Hz, 1H, NH), 7.51 (d, *J* = 7.4 Hz, 2H, 3'-H, 6'-H), 7.40 – 7.29 (m, 4H, 2'-H, 4'-H, 5'-H), 7.26 (d, *J* = 8.7 Hz, 1H, 7-H), 6.91 (d, *J* = 0.8 Hz, 1H, 7-H), 6.68 (dd, *J* = 8.8, 2.4 Hz, 1H, 6-H), 6.41 (d, *J* = 2.6 Hz, 1H, 4-H), 3.46 (s, 3H, OCH<sub>3</sub>). <sup>13</sup>C NMR (151 MHz, DMSO-*d*<sub>6</sub>) δ 152.88 (5-C), 139.68 (1'-C), 131.70 (8-C), 128.04 (9-C), 127.81 (3'-C), 127.49 (2-C), 126.2 (q, *J* = 288.4 Hz, 2''-C), 126.1 (5'-C), 124.3 (2'-C, 4'-C), 113.3 (7-C), 112.6 (6-C), 111.6 (3-C), 103.3 (4-C), 76.2 (q, *J* = 28.5 Hz, 1''-C), 55.20 (O-CH<sub>3</sub>). <sup>19</sup>F NMR (565 MHz, DMSO-*d*<sub>6</sub>) δ -75.05 (CF<sub>3</sub>). LC-MS (m/z) positive mode 322 [M + H]<sup>+</sup>. Purity by HPLC-UV (254 nm)-ESI-MS 99%. HRMS (ESI-QTOF) calculated for C<sub>17</sub>H<sub>14</sub>F<sub>3</sub>NO<sub>2</sub> [M + H]<sup>+</sup>: 322.1055; found: 322.1059.

### 2,2,2-Trifluoro-1-(4-fluorophenyl)-1-(5-methoxy-1*H*-indol-3-yl)ethan-1-ol (3b)

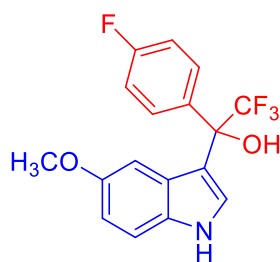

5-Methoxyindole (**1a**, 3.4 mmol), 2,2,2-trifluoro-1-(4-fluorophenyl)ethan-1-one (**2b**, 3.70 mmol), K<sub>2</sub>CO<sub>3</sub> (15 mol %) and *n*-Bu<sub>4</sub>PBr (15 mol %) were used for this reaction in water (5 mL). White crystals; yield: 97 % (1.11g); mp = 115-116 °C. <sup>1</sup>H NMR (600 MHz, DMSO-*d*<sub>6</sub>) δ 11.12 (m, 1H, NH), 7.54 – 7.48 (m, 2'-H, 6'-H), 7.38 (t, *J* = 2.0 Hz, 1H, 4-H), 7.27 (d, *J* = 8.8 Hz, 1H, 7-H), 7.20 – 7.13 (m, 2H, 3'-H, 5'-H), 7.02 (s, 1H, 2-H), 6.70 (dd, *J* = 8.8, 2.4 Hz, 1H), 6.41 (d, *J* = 2.4 Hz, 1H, 6-H), 3.49 (s, 3H, OCH<sub>3</sub>). <sup>13</sup>C NMR (151 MHz, DMSO-*d*<sub>6</sub>) δ 161.76 (d, *J* = 244.3 Hz, 4'-C), 152.99 (5-C), 135.89 (1'-C), 131.74 (8-C), 129.77 (9-C), 125.94 (q, *J* = 289.5 Hz, 2''-C), 124.27 (2-C), 114.73 (2'-C), 114.58 (6'-C), 112.67 (3-C), 112.38 (7-C), 111.34 (6-C), 102.82 (4-C), 75.35 (q, *J* = 29.9 Hz, 1''-C), 55.25 (OCH<sub>3</sub>). <sup>19</sup>F NMR (565 MHz, DMSO-*d*<sub>6</sub>) δ -75.34 (CF<sub>3</sub>), -114.79, -114.80, -114.81, -114.82, -114.84 (PhF). LC-MS (m/z) positive mode 340 [M + H]<sup>+</sup>. Purity by HPLC-UV (254 nm)-ESI-MS 98%. HRMS (ESI-QTOF) calculated for C<sub>17</sub>H<sub>13</sub>F<sub>4</sub>NO<sub>2</sub> [M + H]<sup>+</sup>: 340.0961; found: 340.0970.

### 1-(4-Chlorophenyl)-2,2,2-trifluoro-1-(5-methoxy-1*H*-indol-3-yl)ethan-1-ol (3c)

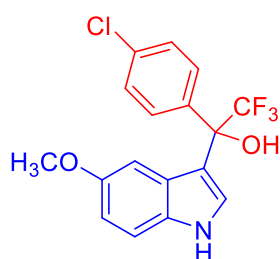

5-Methoxyindole (**1a**, 3.4 mmol), 1-(4-chlorophenyl)-2,2,2-trifluoroethan-1-one (**2c**, 3.70 mmol), K<sub>2</sub>CO<sub>3</sub> (15 mol %) and *n*-Bu<sub>4</sub>PBr (15 mol %) were used for this reaction in water (5 mL). Light brown crystals; yield: 92 % (1.10 g); mp = 153-154 °C. <sup>1</sup>H NMR (600 MHz, DMSO-*d*<sub>6</sub>) δ 11.22 – 10.89 (s, 1H, NH), 7.53 – 7.46 (m, 2H, 3'-H, 5'-H), 7.45 – 7.39 (m, 2H, 2'-H, 4'-H), 7.39 – 7.35 (m, 2H, 2'-H, 6'-H), 7.27 (d, *J* = 8.8 Hz, 1H, 6-H), 7.07 (s, 1H, 4-H), 6.70 (dd, *J* = 8.8, 2.5 Hz, 1H, 7-H), 6.41 (d, *J* = 2.5 Hz, 1H, 2-H), 3.50 (s, 3H). <sup>13</sup>C NMR (151 MHz, DMSO-*d*<sub>6</sub>) δ 153.01 (5-C), 138.72 (1'-C), 132.96 (4'-C), 131.74 (8-C), 129.48 (9-C), 127.92 (3'-C, 5'-C), 125.88 (q, *J* = 285.4 Hz, 2''-C), 124.32 (2'-C, 6'-C), 112.41 (3-C, 6-C),

102.79 (3-C), 75.5 (q,  $J = 29.1$  Hz, 1''-C), 55.26 (OCH<sub>3</sub>). <sup>19</sup>F NMR (565 MHz, DMSO-*d*<sub>6</sub>)  $\delta$  -75.31 (CF<sub>3</sub>). LC-MS (m/z) positive mode 356 [M + H]<sup>1+</sup>. Purity by HPLC-UV (254 nm)-ESI-MS 99%. HRMS (ESI-QTOF) calculated for C<sub>17</sub>H<sub>13</sub>ClF<sub>3</sub>NO<sub>2</sub> [M + H]<sup>1+</sup>: 356.0665; found: 356.0667.

### 1-(4-Bromophenyl)-2,2,2-trifluoro-1-(5-methoxy-1*H*-indol-3-yl)ethan-1-ol (3d)

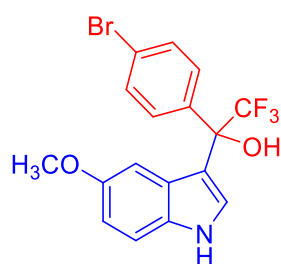

5-Methoxyindole (**1a**, 3.4 mmol), 1-(4-bromophenyl)-2,2,2-trifluoroethan-1-one (**2d**, 3.70 mmol), K<sub>2</sub>CO<sub>3</sub> (15 mol %) and *n*-Bu<sub>4</sub>PBr (15 mol %) were used for this reaction in water (5 mL). White crystals; yield: 89% (1.20 g); mp = 172-173 °C. <sup>1</sup>H NMR (600 MHz, DMSO-*d*<sub>6</sub>)  $\delta$  11.33 (s, 1H, NH), 7.67 – 7.49 (m, 2H, 3'-H, 5'-H), 7.43 (d,  $J = 8.4$  Hz, 2H, 2'-H, 6'-H), 7.37 (s, 1H, 2-H), 7.27 (d,  $J = 8.8$  Hz, 1H, 6-H), 7.07 (s, 1H, 4-H), 6.70 (dd,  $J = 8.7, 2.5$  Hz, 1H, 7-H), 6.41 (d,  $J = 2.5$  Hz, 1H, 6-H), 3.50 (s, 3H, OCH<sub>3</sub>). <sup>13</sup>C NMR (151 MHz, DMSO-*d*<sub>6</sub>)  $\delta$  152.96 (5-C), 139.13 (1'-C), 131.69 (4'-C), 130.82 (8-C, 9-C), 129.76 (3'-C, 5'-C), 125.83 (q,  $J = 291.2$  Hz, 2''-C), 124.27 (2'-C), 121.59 (2-C), 112.37 (3-C, 6-C), 111.25 (7-C), 102.76 (4-C), 75.5 (q,  $J = 28.0$  Hz, 1''-C), 55.22 (OCH<sub>3</sub>). <sup>19</sup>F NMR (565 MHz, DMSO-*d*<sub>6</sub>)  $\delta$  -75.27 (CF<sub>3</sub>). LC-MS (m/z) positive mode 401 [M + H]<sup>1+</sup>. Purity by HPLC-UV (254 nm)-ESI-MS 97%. HRMS (ESI-QTOF) calculated for C<sub>17</sub>H<sub>13</sub>BrF<sub>3</sub>NO<sub>2</sub> [M + H]<sup>1+</sup>: 400.0160; found: 400.0153.

### 2,2,2-Trifluoro-1-(5-methoxy-1*H*-indol-3-yl)-1-(*p*-tolyl)ethan-1-ol (3e)

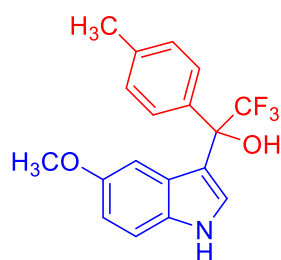

5-Methoxyindole (**1a**, 3.4 mmol), 2,2,2-trifluoro-1-(*p*-tolyl)ethan-1-one (**2e**, 3.70 mmol), K<sub>2</sub>CO<sub>3</sub> (15 mol %) and *n*-Bu<sub>4</sub>PBr (15 mol %) were used for this reaction in water (5 mL). White crystals; yield: 98% (1.11 g); mp = 130-131 °C. <sup>1</sup>H NMR (600 MHz, DMSO-*d*<sub>6</sub>)  $\delta$  11.11 (s, 1H, NH), 7.49 – 7.30 (m, 3H, 2'-H, 6'-H, 2-H), 7.25 (d,  $J = 8.8$  Hz, 1H, 2-H), 7.17 – 7.03 (m,

2H, 3'-H, 5'-H), 6.83 (s, 1H, 4-H), 6.68 (dd,  $J = 8.8, 2.5$  Hz, 1H, 7-H), 6.45 (d,  $J = 2.4$  Hz, 1H, 6-H), 3.48 (s, 3H, OCH<sub>3</sub>), 2.28 (s, 3H, CH<sub>3</sub>). <sup>13</sup>C NMR (151 MHz, DMSO-*d*<sub>6</sub>)  $\delta$  152.84 (5-C), 137.21 (1'-C), 136.75 (4'-C), 131.71 (2-C), 128.38 (8-C, 9-C), 127.40 (3'-C, 5'-C), 126.10 (q,  $J = 286.4$  Hz, 2''-C), 124.17 (2'-C, 6'-C), 113.14 (3-C), 112.20 (6-C), 111.09 (7-C), 103.20 (4-C), 75.37 (q,  $J = 28.6$  Hz, 1''-C), 55.24 (OCH<sub>3</sub>). <sup>19</sup>F NMR (565 MHz, DMSO-*d*<sub>6</sub>)  $\delta$ , -75.35 (CF<sub>3</sub>). LC-MS (m/z) positive mode 336 [M + H]<sup>1+</sup>. Purity by HPLC-UV (254 nm)-ESI-MS 99%. HRMS (ESI-QTOF) calculated for C<sub>18</sub>H<sub>16</sub>F<sub>3</sub>NO<sub>2</sub> [M + H]<sup>1+</sup>: 336.1211; found: 336.1210.

### 2,2,2-Trifluoro-1-(5-methoxy-1*H*-indol-3-yl)-1-(4-methoxyphenyl)ethan-1-ol (3f)

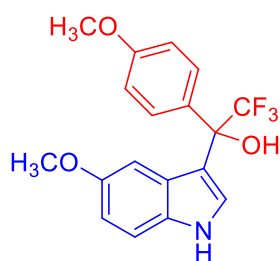

5-Methoxyindole (**1a**, 3.4 mmol), 2,2,2-trifluoro-1-(4-methoxyphenyl)ethan-1-one (**2f**, 3.70 mmol), K<sub>2</sub>CO<sub>3</sub> (15 mol %) and *n*-Bu<sub>4</sub>PBr (15 mol %) were used for this reaction in water (5 mL). White solid; yield: 93% (1.12 g); mp = 151-152 °C. <sup>1</sup>H NMR (600 MHz, DMSO-*d*<sub>6</sub>)  $\delta$  11.22 (s, 1H, NH), 7.46 – 7.35 (m, 2H, 2'-H, 6'-H), 7.33 (q,  $J = 1.9$  Hz, 1H, 2-H), 7.26 (dd,  $J = 8.9, 0.6$  Hz, 1H, 7-H), 6.95 – 6.84 (m, 2H, 3'-H, 5'-H), 6.80 (s, 1H, 4-H), 6.69 (dd,  $J = 8.7, 2.5$  Hz, 1H, 6-H), 3.73 (s, 3H, OCH<sub>3</sub>), 3.49 (s, 3H, OCH<sub>3</sub>). <sup>13</sup>C NMR (151 MHz, DMSO-*d*<sub>6</sub>)  $\delta$  159.00 (5-C), 152.86 (5'-C), 131.73 (4'-C), 131.60 (1'-C), 128.78 (8-C, 9-C), 126.12 (q,  $J = 287.2$  Hz, 2''-C), 124.16 (2'-C, 6'-C), 113.19 (2-C), 113.15 (3-C), 112.21 (6-C), 111.11 (7-C), 103.22 (4-C), 75.37 (q,  $J = 28.5$  Hz, 1''-C), 55.27 (OCH<sub>3</sub>), 55.18 (OCH<sub>3</sub>). <sup>19</sup>F NMR (565 MHz, DMSO-*d*<sub>6</sub>)  $\delta$  -75.33 (CF<sub>3</sub>). LC-MS (m/z) positive mode 352 [M + H]<sup>1+</sup>. Purity by HPLC-UV (254 nm)-ESI-MS 98%. HRMS (ESI-QTOF) calculated for C<sub>18</sub>H<sub>16</sub>F<sub>3</sub>NO<sub>3</sub> [M + H]<sup>1+</sup>: 352.1161; found: 352.1155.

### 2,2,2-Trifluoro-1-(furan-2-yl)-1-(5-methoxy-1*H*-indol-3-yl)ethan-1-ol (3g)



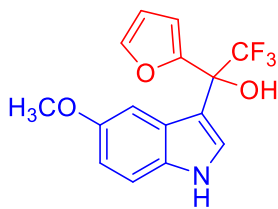

5-Methoxyindole (**1a**, 3.4 mmol), 2,2,2-trifluoro-1-(furan-2-yl)ethan-1-one (**2g**, 3.70 mmol), K<sub>2</sub>CO<sub>3</sub> (15 mol %) and *n*-Bu<sub>4</sub>PBr (15 mol %) were used for this reaction in water (5 mL). White solid; yield: 97%

(1.0 g); mp = 158-159 °C. <sup>1</sup>H NMR (600 MHz, DMSO-*d*<sub>6</sub>) δ 11.09 (s, 1H, NH), 7.68 (dd, *J* = 1.8, 0.9 Hz, 1H, 5'-H), 7.38 – 7.20 (m, 2H, 3'-H, 4'-H), 7.13 (s, 1H, 2-H), 6.72 (dd, *J* = 8.8, 2.5 Hz, 1H, 7-H), 6.65 (d, *J* = 2.5 Hz, 1H, 4-H), 6.59 – 6.54 (m, 1H, 6-H), 6.52 (dd, *J* = 3.3, 1.8 Hz, 1H, OH), 3.60 (s, 3H, OCH<sub>3</sub>). <sup>13</sup>C NMR (151 MHz, DMSO-*d*<sub>6</sub>) δ 153.26 (5-C), 152.19 (2'-C), 143.41 (5'-C), 131.61 (8-C, 9-C), 126.06 (q, *J* = 286.2 Hz, 2''-C), 125.52 (2-C), 112.36 (3-C), 111.32 (6-C), 111.16 (7-C), 110.49 (3'-C), 109.29 (4'-C), 102.43 (4-C), 73.18 (q, *J* = 30.5 Hz, 1''-C), 55.35 (OCH<sub>3</sub>). <sup>19</sup>F NMR (565 MHz, DMSO-*d*<sub>6</sub>) δ -76.13 (CF<sub>3</sub>). LC-MS (*m/z*) positive mode 312 [M + H]<sup>1+</sup>. Purity by HPLC-UV (254 nm)-ESI-MS 99%. HRMS (ESI-QTOF) calculated for C<sub>15</sub>H<sub>12</sub>F<sub>3</sub>NO<sub>3</sub> [M + H]<sup>1+</sup>: 312.0848; found: 312.0852.

### 2,2,2-Trifluoro-1-(5-methoxy-1*H*-indol-3-yl)-1-(thiophen-2-yl)ethan-1-ol (**3h**)

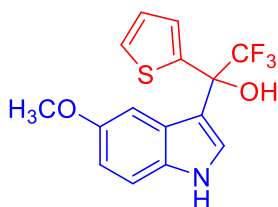

5-Methoxyindole (**1a**, 3.4 mmol), (2,2,2-trifluoro-1-(thiophen-2-yl)ethan-1-one (**2h**, 3.70 mmol), K<sub>2</sub>CO<sub>3</sub> (15 mol %) and *n*-Bu<sub>4</sub>PBr (15 mol %) were used for this reaction in water (5 mL). Light brown solid; yield:

98% (1.08 g); mp = 148-149 °C. <sup>1</sup>H NMR (600 MHz, DMSO-*d*<sub>6</sub>) δ 11.30 (s, 1H, NH), 7.73 – 7.49 (m, 1H, 5'-H), 7.43 – 7.30 (m, 1H, 7-H), 7.30 – 7.17 (m, 2H, 2-H, 3'-H), 7.13 – 6.81 (m, 2H, 4'-H, 6-H), 6.81 – 6.51 (m, 2H, 4-H, OH), 3.57 (s, 3H, OCH<sub>3</sub>). <sup>13</sup>C NMR (151 MHz, DMSO-*d*<sub>6</sub>) δ 153.08 (5-C), 144.43 (2'-C), 131.68 (8-C, 9-C), 126.77 (5'-C, 4'-C), 126.53 (3'-C), 126.50 (2-C), 126.08 (q, *J* = 286.4 Hz, 2''-C), 112.34 (3-C, 6-C), 111.35 (7-C), 102.95 (4-C), 74.70 (q, *J* = 30.5 Hz, 1''-C), 55.28 (OCH<sub>3</sub>). <sup>19</sup>F NMR (565 MHz, DMSO-*d*<sub>6</sub>) δ -76.20 (CF<sub>3</sub>). LC-MS (*m/z*) positive mode 328 [M + H]<sup>1+</sup>. Purity by HPLC-UV (254 nm)-ESI-MS 97%. HRMS (ESI-QTOF) calculated for C<sub>15</sub>H<sub>12</sub>F<sub>3</sub>NO<sub>2</sub>S [M + H]<sup>1+</sup>: 328.0619 found: 328.0633.

### 2,2-Difluoro-1-(5-methoxy-1*H*-indol-3-yl)-1-phenylethan-1-ol (3i)

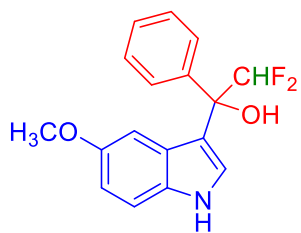

5-Methoxyindole (**1a**, 3.4 mmol), 2,2-difluoro-1-phenylethan-1-one (**2i**, 3.70 mmol), K<sub>2</sub>CO<sub>3</sub> (15 mol %) and *n*-Bu<sub>4</sub>PBr (15 mol %) were used for this reaction in water (5 mL). Brown solid; yield: 63% (0.650 g); mp = 185-186 °C. <sup>1</sup>H NMR (500 MHz, DMSO-*d*<sub>6</sub>) δ 10.93 (s, 1H, NH), 7.51 – 7.45 (m, 2H, 2'-H, 6'-H), 7.35 – 7.19 (m, 5H, 3'-H, 4'-H, 5'-H, 4-H, 7-H), 6.67 (dd, *J* = 8.8, 2.5 Hz, 1H, 6-H), 6.58 (t, *J* = 2.3 Hz, 1H, 2-H), 6.17 (s, 1H, 2''-H), 3.51 (s, 3H, OCH<sub>3</sub>). <sup>13</sup>C NMR (151 MHz, DMSO-*d*<sub>6</sub>) δ 152.74 (5-C), 141.31 (1'-C), 131.71 (3'-C, 5'-C), 127.66 (8-C), 127.27 (9-C), 127.21 (2'-C), 126.18 (6'-C), 123.98 (4'-C), 118.65 (2-C), 117.00 (t, *J* = 247.4 Hz, 2''-C), 112.04 (3-C), 111.04 (6-C, 7-C), 103.14 (4-C), 74.88 (t, *J* = 21.3 Hz, 1''-C), 55.24 (OCH<sub>3</sub>). <sup>19</sup>F NMR (565 MHz, DMSO-*d*<sub>6</sub>) δ -126.11 (dd, *J* = 271.4 Hz, *J* = 56.3 Hz), -127.67 (dd, *J* = 271.3 Hz, *J* = 56.3 Hz). LC-MS (*m/z*) positive mode 304 [M + H]<sup>1+</sup>. Purity by HPLC-UV (254 nm)-ESI-MS 96%. HRMS (ESI-QTOF) calculated for C<sub>17</sub>H<sub>15</sub>F<sub>2</sub>NO<sub>2</sub> [M + H]<sup>+</sup>: 304.1149 found: 304.1153.

### 2-Chloro-2,2-difluoro-1-(5-methoxy-1*H*-indol-3-yl)-1-phenylethan-1-ol (3m)

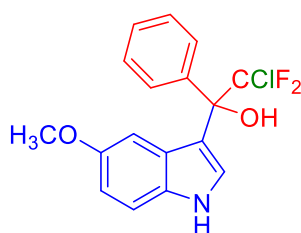

5-Methoxyindole (**1a**, 3.4 mmol), 2-chloro-2,2-difluoro-1-phenylethan-1-one (**2m**, 3.70 mmol), K<sub>2</sub>CO<sub>3</sub> (15 mol %) and *n*-Bu<sub>4</sub>PBr (15 mol %) were used for this reaction in water (5 mL). White solid; yield: 94% (1.07 g); mp = 158-159 °C. <sup>1</sup>H NMR (600 MHz, DMSO-*d*<sub>6</sub>) δ 11.04 (s, 1H, NH), 7.63 – 7.48 (m, 2H, 2'-H, 6'-H), 7.40 (q, *J* = 1.8 Hz, 1H, 7-H), 7.36 – 7.27 (m, 3H, , 3'-H, 5'-H, 4-H), 7.24 (d, *J* = 8.7 Hz, 1H, 6-H), 7.02 (s, 1H, 2-H), 6.67 (dd, *J* = 8.8, 2.5 Hz, 1H, 4'-H), 6.45 (d, *J* = 2.4 Hz, 1H, OH), 3.47 (s, 3H, OCH<sub>3</sub>). <sup>13</sup>C NMR (151 MHz, DMSO-*d*<sub>6</sub>) δ 152.86 (5-C), 140.37 (1'-C), 131.53 (q, *J* = 303.9 Hz, 2''-C), 127.92 (8-C, 9-C), 127.90 (3'-C, 5'-C), 127.59 (2'-C, 6'-C, 4'-C), 124.30 (2-C), 113.41 (3-C), 112.17 (6-C), 111.17 (7-C), 103.16 (4-C), 79.40 (t, *J* = 24.5 Hz, 1''-C), 55.22 (OCH<sub>3</sub>). <sup>19</sup>F NMR (565

MHz, DMSO-*d*<sub>6</sub>)  $\delta$  -58.84 (CClF<sub>2</sub>). LC-MS (m/z) positive mode 338 [M + H]<sup>1+</sup>. Purity by HPLC-UV (254 nm)-ESI-MS 98%. HRMS (ESI-QTOF) calculated for C<sub>17</sub>H<sub>14</sub>ClF<sub>2</sub>NO<sub>2</sub> [M + H]<sup>+</sup>: 338.0759 found: 338.0765.

### 2,2,3,3,3-Pentafluoro-1-(5-methoxy-1*H*-indol-3-yl)-1-phenylpropan-1-ol (3n)

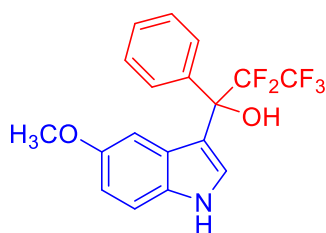

5-Methoxyindole (**1a**, 3.4 mmol), 2,2,3,3,3-pentafluoro-1-phenylpropan-1-one (**2n**, 3.70 mmol), K<sub>2</sub>CO<sub>3</sub> (15 mol %) and *n*-Bu<sub>4</sub>PBr (15 mol %) were used for this reaction in water (5 mL).

Yellow solid; yield: 93% (1.17 g); mp = 168-169 °C. <sup>1</sup>H NMR (600

MHz, DMSO-*d*<sub>6</sub>)  $\delta$  11.06 (s, 1H, NH), 7.66 – 7.50 (m, 2H, 2'-H, 6'-H), 7.43 (t, *J* = 2.1 Hz, 1H, 4'-H), 7.36 – 7.31 (m, 2H, 3'-H, 5'-H), 7.31 – 7.25 (m, 1H, 6-H), 7.24 (d, *J* = 8.8 Hz, 1H, 6-H), 7.06 (s, 1H, 2-H), 6.66 (dd, *J* = 8.8, 2.5 Hz, 1H, 7-H), 6.49 (d, *J* = 2.4 Hz, 1H, OH), 3.47 (s, 3H, OCH<sub>3</sub>). <sup>13</sup>C NMR (151 MHz, DMSO-*d*<sub>6</sub>)  $\delta$  152.81 (5-C), 139.74 (1'-C), 131.55 (4'-C), 127.90 (m, 3''-C), 127.73 (8-C, 9-C), 127.32 (2'-C, 6'-C), 126.08 (3'-C, 5'-C), 123.99 (2-C), 118.02 (m, 2''-C), 113.53 (3-C), 112.16 (6-C, 7-C), 111.15 (4-C), 103.07 (1''-C), 55.18 (OCH<sub>3</sub>). <sup>19</sup>F NMR (565 MHz, DMSO-*d*<sub>6</sub>)  $\delta$  116.78 (m, CF<sub>2</sub>-CF<sub>2</sub>), -76.11 (s, CF<sub>3</sub>). LC-MS (m/z) positive mode 372 [M + H]<sup>1+</sup>. Purity by HPLC-UV (254 nm)-ESI-MS 97%. HRMS (ESI-QTOF) calculated for C<sub>18</sub>H<sub>14</sub>F<sub>5</sub>NO<sub>2</sub> [M + H]<sup>+</sup>: 372.1023 found: 372.1027.

### 2,2,3,3,4,4,4-Heptafluoro-1-(5-methoxy-1*H*-indol-3-yl)-1-phenylbutan-1-ol (3o)

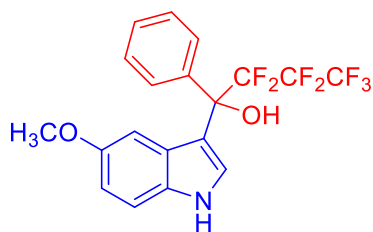

5-Methoxyindole (**1a**, 3.4 mmol), 2,2,3,3,4,4,4-heptafluoro-1-phenylbutan-1-one (**2o**, 3.70 mmol), K<sub>2</sub>CO<sub>3</sub> (15 mol %) and *n*-Bu<sub>4</sub>PBr (15 mol %) were used for this reaction in water (5 mL).

Yellow solid; yield: 90% (1.29 g); mp = 161-163 °C. <sup>1</sup>H NMR

(600 MHz, DMSO-*d*<sub>6</sub>)  $\delta$  11.04 (s, 1H, NH), 7.62 – 7.50 (m, 2H, 2'-H, 6'-H), 7.43 (q, *J* = 2.2 Hz,

1H, 4'-H), 7.37 – 7.31 (m, 2H, 3'-H, 5'-H), 7.31 – 7.26 (m, 1H, 4-H), 7.24 (d,  $J = 8.7$  Hz, 1H, 6-H), 7.06 (s, 1H, 2-H), 6.66 (dd,  $J = 8.8, 2.5$  Hz, 1H, 7-H), 6.49 (d,  $J = 2.4$  Hz, 1H, OH), 3.47 (s, 3H, OCH<sub>3</sub>). <sup>13</sup>C NMR (151 MHz, DMSO-*d*<sub>6</sub>)  $\delta$  152.81 (5-C), 139.74 (1'-C), 131.54 (4'-C), 127.89 (8-C, 9-C), 127.73 (2'-C, 6'-C), 127.31 (3'-C), 126.08 (5'-C), 124.00 (2-C), 120.21 (m, 2''-C), 118.29 (m, 3''-C), 115.23 (m, 4''-C), 113.54 (3-C), 112.15 (6-C), 111.15 (7-C), 103.06 (4-C), 76.30, 76.15, 76.00 (m, 1''-C), 55.17 (OCH<sub>3</sub>). <sup>19</sup>F NMR (565 MHz, DMSO-*d*<sub>6</sub>)  $\delta$  116.71 (m, CF<sub>2</sub>), -76.11 (s, CF<sub>3</sub>). LC-MS (m/z) positive mode 422 [M + H]<sup>1+</sup>. Purity by HPLC-UV (254 nm)-ESI-MS 97%. HRMS (ESI-QTOF) calculated for C<sub>19</sub>H<sub>14</sub>F<sub>7</sub>NO<sub>2</sub> [M + H]<sup>1+</sup>: 422.0991 found: 422.0997.

### 2,2,2-Trifluoro-1-(1*H*-indol-3-yl)-1-phenylethan-1-ol (3p)

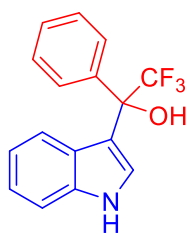

1*H*-Indole (**1b**, 3.4 mmol), 2,2,2-trifluoro-1-phenylethan-1-one (**2a**, 3.70 mmol), K<sub>2</sub>CO<sub>3</sub> (15 mol %) and *n*-Bu<sub>4</sub>PBr (15 mol %) were used for this reaction in water (5 mL). Orange solid; yield: 96% (1.20 g); mp = 122-124 °C.

<sup>1</sup>H NMR (600 MHz, DMSO-*d*<sub>6</sub>)  $\delta$  11.21 (s, 1H, NH), 7.49 (d,  $J = 7.3$  Hz, 2H, 2'-H, 6'-H), 7.41 (t,  $J = 2.2$  Hz, 1H, 4'-H), 7.37 (dd,  $J = 8.2, 1.1$  Hz, 1H, 7-H), 7.34 – 7.27 (m, 3H, , 3'-H, 5'-H, 4-H), 7.05 – 6.97 (m, 2H, 5-H, 2-H), 6.95 (d,  $J = 0.7$  Hz, 1H, OH), 6.78 (td,  $J = 7.5, 7.1, 1.2$  Hz, 1H, 6-H). <sup>13</sup>C NMR (151 MHz, DMSO-*d*<sub>6</sub>)  $\delta$  139.73 (1'-C), 136.54 (9-C), 128.07 (8-C), 127.80 (3'-C), 127.47 (5'-C), 127.2 (q,  $J = 282.7$  Hz, 2''-C), 125.57 (2'-C), 123.59 (6'-C), 121.44 (2-C), 120.80 (4'-C), 118.85 (5-C, 6-C), 113.34 (3-C), 111.69 (4-C), 75.97, (q,  $J = 28.9$  Hz, 1''-C)). <sup>19</sup>F NMR (565 MHz, DMSO-*d*<sub>6</sub>)  $\delta$  -75.12 (CF<sub>3</sub>). LC-MS (m/z) positive mode 292 [M + H]<sup>1+</sup>. Purity by HPLC-UV (254 nm)-ESI-MS 98%. HRMS (ESI-QTOF) calculated for C<sub>16</sub>H<sub>12</sub>F<sub>3</sub>NO [M + H]<sup>1+</sup>: 292.0942 found: 292.0950.

### 2,2,2-Trifluoro-1-(4-methoxy-1*H*-indol-3-yl)-1-phenylethan-1-ol (3q)

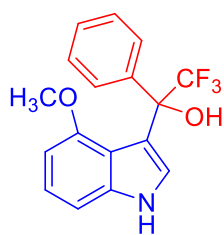

4-Methoxyindole (**1c**, 3.4 mmol), 2,2,2-trifluoro-1-phenylethan-1-one (**2a**, 3.70 mmol), K<sub>2</sub>CO<sub>3</sub> (15 mol %) and *n*Bu<sub>4</sub>PBr (15 mol %) were used for this reaction in water (5 mL). White solid; yield: 79% (0.86 g); mp = 160-161 °C. <sup>1</sup>H NMR (600 MHz, DMSO-*d*<sub>6</sub>) δ 11.44 (s, 1H, NH), 7.45 – 7.35 (m, 2H, 2'-H, 6'-H), 7.34 – 7.22 (m, 4H, 3'-H, 4'-H, 5'-H, 5-H), 7.09 – 6.97 (m, 2H, 2-H, 6-H), 6.43 (dd, *J* = 7.5, 1.1 Hz, 1H, 7-H), 6.21 (s, 1H, OH), 3.46 (s, 3H, OCH<sub>3</sub>). <sup>13</sup>C NMR (151 MHz, DMSO-*d*<sub>6</sub>) δ 151.73 (4-C), 141.01 (1'-C), 138.31 (4'-C), 127.78 (8-C), 127.54 (9-C), 127.37 (2'-C, 6'-C), 125.03 (q, *J* = 284.5 Hz, (2''-C), 122.84 (3'-C, 5'-C), 115.38 (5-C), 113.12 (3-C), 105.72 (6-C), 100.78 (7-C), 76.47, 76.29, 76.10 (q, *J* = 28.3 Hz, 1''-C), 55.28 (OCH<sub>3</sub>). <sup>19</sup>F NMR (565 MHz, DMSO-*d*<sub>6</sub>) δ -72.17 (CF<sub>3</sub>). LC-MS (*m/z*) positive mode 322 [M + H]<sup>1+</sup>. Purity by HPLC-UV (254 nm)-ESI-MS 99%. HRMS (ESI-QTOF) calculated for C<sub>17</sub>H<sub>14</sub>F<sub>3</sub>NO<sub>2</sub> [M + H]<sup>+</sup>: 322.1055 found: 322.1054.

### 2,2,2-Trifluoro-1-(6-methoxy-1*H*-indol-3-yl)-1-phenylethan-1-ol (**3r**)

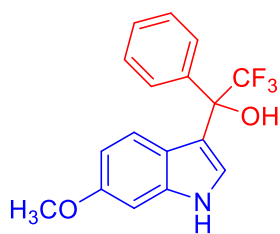

6-Methoxyindole (**1d**, 3.4 mmol), 2,2,2-trifluoro-1-phenylethan-1-one (**2a**, 3.70 mmol), K<sub>2</sub>CO<sub>3</sub> (15 mol %) and *n*-Bu<sub>4</sub>PBr (15 mol %) were used for this reaction in water (5 mL). Brown solid; yield: 90% (0.98 g); mp = 192-193°C. <sup>1</sup>H NMR (600 MHz, DMSO-*d*<sub>6</sub>) δ 11.20 (s, 1H), 7.55 – 7.39 (m, 2H, 2'-H, 6'-H), 7.36 – 7.23 (m, 4H, 3'-H, 4'-H, 5'-H, 2-H), 6.92 (s, 1H, OH), 6.89 – 6.79 (m, 2H, 5-H, 7-H), 6.46 (dd, *J* = 8.9, 2.3 Hz, 1H, 4-H), 3.70 (s, 3H, OCH<sub>3</sub>). <sup>13</sup>C NMR (151 MHz, DMSO-*d*<sub>6</sub>) δ 155.73 (6-C), 139.76 (1'-C), 128.06 (8-C, 9-C), 127.60 (q, *J* = 286.0 Hz, (2''-C), 122.30 (2'-C, 6'-C), 121.33 (3'-C, 5'-C), 119.84 (2-C), 113.33 (3-C), 109.25 (5-C), 94.59 (4-C), 76.13 (q, *J* = 29.2 Hz, 1''-C), 55.29 (OCH<sub>3</sub>). <sup>19</sup>F NMR (565 MHz, DMSO) δ -75.13 (CF<sub>3</sub>). LC-MS (*m/z*) positive mode 322 [M + H]<sup>1+</sup>. Purity by HPLC-UV (254 nm)-ESI-MS 97%. HRMS (ESI-QTOF) calculated for C<sub>17</sub>H<sub>14</sub>F<sub>3</sub>NO<sub>2</sub> [M + H]<sup>+</sup>: 322.1055 found: 322.1061.

### 2,2,2-Trifluoro-1-(5-fluoro-1*H*-indol-3-yl)-1-phenylethan-1-ol (3s)<sup>[1]</sup>

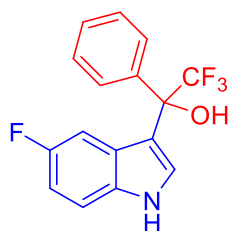

5-Fluoroindole (**1e**, 3.4 mmol), 2,2,2-trifluoro-1-phenylethan-1-one (**2a**, 3.70 mmol), K<sub>2</sub>CO<sub>3</sub> (15 mol %) and *n*-Bu<sub>4</sub>PBr (15 mol %) were used for this reaction in water (5 mL). White solid; yield: 94% (1.07 g); mp = 112–113°C. <sup>1</sup>H NMR (600 MHz, DMSO-*d*<sub>6</sub>) δ 11.51 (s, 1H, NH), 7.59 – 7.43 (m, 3H, 4-H, 2'-H, 6'-H), 7.43 – 7.18 (m, 4H, 3'-H, 5'-H, 2H), 7.01 (s, 1H, OH), 6.88 (td, *J* = 9.1, 2.6 Hz, 1H, 7-H), 6.62 (dd, *J* = 10.4, 2.6 Hz, 1H, 6-H). <sup>13</sup>C NMR (151 MHz, DMSO-*d*<sub>6</sub>) δ 157.27 (d, *J* = 231.4 Hz, 5-C), 139.37 (1'-C), 133.20 (4'-C), 128.25 (8-C, 9-C), 127.60 (3'-C, 5'-C), 125.66 (q, *J* = 286.1 Hz, 2''-C), 113.65 (2-C), 112.79 (3-C), 109.86 (7-C), 109.68 (6-C), 105.23 (4-C), 75.60 (q, *J* = 30.1 Hz, 1''-C). <sup>19</sup>F NMR (565 MHz, DMSO-*d*<sub>6</sub>) δ -75.132 (s, CF<sub>3</sub>), -124.85 (m, 5-F). LC-MS (m/z) positive mode 310 [M + H]<sup>1+</sup>. Purity by HPLC-UV (254 nm)-ESI-MS 99%. HRMS (ESI-QTOF) calculated for C<sub>16</sub>H<sub>11</sub>F<sub>4</sub>NO [M + H]<sup>+</sup>: 310.0855 found: 310.0857.

### 2,2,2-Trifluoro-1-(6-fluoro-1*H*-indol-3-yl)-1-phenylethan-1-ol (3t)

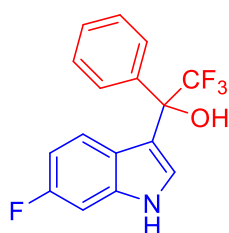

6-Fluoroindole (**1f**, 3.4 mmol), 2,2,2-trifluoro-1-phenylethan-1-one (**2a**, 3.70 mmol), K<sub>2</sub>CO<sub>3</sub> (15 mol %) and *n*-Bu<sub>4</sub>PBr (15 mol %) were used for this reaction in water (5 mL). White solid; yield: 96% (1.10 g); mp = 90–91°C. <sup>1</sup>H NMR (600 MHz, DMSO-*d*<sub>6</sub>) δ 11.27 (s, 1H, NH), 7.48 (dd, *J* = 7.6, 1.7 Hz, 2H, 2'-H, 6'-H), 7.41 (d, *J* = 2.5 Hz, 1H, 2-H), 7.37 – 7.28 (m, 3H, 3'-H, 4-H, 5'-H), 7.14 (dd, *J* = 10.0, 2.4 Hz, 1H, 7-H), 7.02 (s, 1H, OH), 6.97 (dd, *J* = 8.8, 5.5 Hz, 1H, 4-H), 6.67 (td, *J* = 9.4, 2.4 Hz, 1H, 5-H). <sup>13</sup>C NMR (151 MHz, DMSO-*d*<sub>6</sub>) δ 159.55 (d, *J* = 235.2 Hz, 6-C), 139.48 (1'-C), 136.37 (4'-C), 128.17 (8-C, 9-C), 127.56 (q, *J* = 286.6 Hz, 2''-C), 124.97 (2'-C, 6'), 124.27 (3'-C, 5'-C), 122.35 (4'-C), 121.72 (2-C), 113.55 (3-C), 107.59 (5-C), 97.50 (7-C, 4-C), 75.73 (q, *J* = 30.1 Hz, (1''-C)). <sup>19</sup>F NMR (565 MHz, DMSO-*d*<sub>6</sub>) δ -75.10 (s, CF<sub>3</sub>), -

121.71 (m, 6-F). LC–MS (m/z) positive mode 310 [M + H]<sup>1+</sup>. Purity by HPLC-UV (254 nm)-ESI-MS 99%. HRMS (ESI-QTOF) calculated for C<sub>16</sub>H<sub>11</sub>F<sub>4</sub>NO [M + H]<sup>+</sup>: 310.0855 found: 310.0859.

### 2,2,2-Trifluoro-1-phenyl-1-(1*H*-pyrrolo[3,2-*b*]pyridin-3-yl)ethan-1-ol (3u)

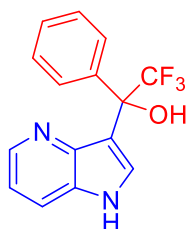

4-Azaindole (**1g**, 3.4 mmol), 2,2,2-trifluoro-1-phenylethan-1-one (**2a**, 3.70 mmol), K<sub>2</sub>CO<sub>3</sub> (15 mol %) and *n*-Bu<sub>4</sub>PBr (15 mol %) were used for this reaction in water (5 mL). Light brown solid; yield: 91% (1.12 g); mp = 165–166 °C. <sup>1</sup>H NMR (600 MHz, DMSO-*d*<sub>6</sub>) δ 11.62 (s, 1H, NH), 8.26 (dd, *J* = 4.6, 1.4 Hz, 1H, 5-H), 7.95 (s, 1H, 2-H), 7.84 (dd, *J* = 8.3, 1.4 Hz, 1H, 7-H), 7.74 (s, 1H, 2-H), 7.69 – 7.61 (m, 2H, 2'-H, 6'-H), 7.35 (dd, *J* = 8.3, 6.6 Hz, 2H, 3'-H, 5'-H), 7.33 – 7.27 (m, 1H, 4'-H), 7.15 (dd, *J* = 8.2, 4.6 Hz, 1H, 6-H). <sup>13</sup>C NMR (151 MHz, DMSO-*d*<sub>6</sub>) δ 144.24 (5-C), 142.24 (1'-C), 140.15 (7-C), 128.94 (8-C), 128.47 (9-C), 128.32 (3'-C, 5'-C), 127.23 (2'-C, 4'-C)', 125.56 (q, *J* = 286.6 Hz, 2''-C), 120.10 (2-C), 117.29 (6-C), 111.77 (3-C), 77.41 (q, *J* = 29.3 Hz, 1''-C). <sup>19</sup>F NMR (565 MHz, DMSO-*d*<sub>6</sub>) δ -76.49 (CF<sub>3</sub>). LC–MS (m/z) positive mode 293 [M + H]<sup>1+</sup>. Purity by HPLC-UV (254 nm)-ESI-MS 98%. HRMS (ESI-QTOF) calculated for C<sub>15</sub>H<sub>11</sub>F<sub>3</sub>N<sub>2</sub>O [M + H]<sup>+</sup>: 293.0902 found: 293.0907.

### 2,2,2-Trifluoro-1-phenyl-1-(1*H*-pyrrolo[3,2-*c*]pyridin-3-yl)ethan-1-ol (3v)

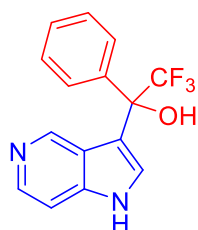

5-Azaindole (**1h**, 3.4 mmol), 2,2,2-trifluoro-1-phenylethan-1-one (**2a**, 3.70 mmol), K<sub>2</sub>CO<sub>3</sub> (15 mol %) and *n*-Bu<sub>4</sub>PBr (15 mol %) were used for this reaction in water (5 mL). Light brown solid; yield: 92% (1.17 g); mp = 227–228 °C. <sup>1</sup>H NMR (600 MHz, DMSO-*d*<sub>6</sub>) δ 11.73 (s, 1H, NH), 8.73 (d, *J* = 1.1 Hz, 1H, 4-H), 7.89 (d, *J* = 5.5 Hz, 1H, 6-H), 7.49 (dd, *J* = 7.6, 2.0 Hz, 2H, 7-H, 4'-H), 7.40 – 7.18 (m, 3H, 2'-H, 3'-H, 6'-H), 7.11 (s, 1H, 2-H), 6.90 (dd, *J* = 5.5, 1.1 Hz, 1H, OH). <sup>13</sup>C NMR (151 MHz, DMSO-*d*<sub>6</sub>) δ 139.33 (4-C), 137.73 (6-C), 134.95 (1'-C), 133.77 (4'-C), 133.76 (3'-C), 130.02 (5'-C), 128.33 (2'-C), 128.00 (6'-C), 127.51 (7-C), 127.36 (9-C), 126.87 (q, *J* = 287.7

Hz, 2''-C), 124.97 (2-C), 115.05 (3-C), 75.70 (q,  $J = 28.7$  Hz, 1''-C).  $^{19}\text{F}$  NMR (565 MHz, DMSO- $d_6$ )  $\delta$  -75.20 ( $\text{CF}_3$ ). LC-MS (m/z) positive mode 293  $[\text{M} + \text{H}]^{1+}$ . Purity by HPLC-UV (254 nm)-ESI-MS 97%.

### 22,2,2-Trifluoro-1-phenyl-1-(1*H*-pyrrolo[2,3-*c*]pyridin-3-yl)ethan-1-ol (3w)

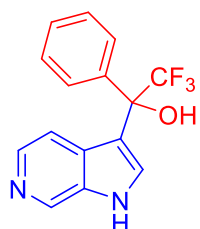

6-Azaindole (**1i**, 3.4 mmol), 2,2,2-trifluoro-1-phenylethan-1-one (**2a**, 3.70 mmol),  $\text{K}_2\text{CO}_3$  (15 mol %) and  $n\text{-Bu}_4\text{PBr}$  (15 mol %) were used for this reaction in water (5 mL). White solid; yield: 97% (1.20 g); mp = 239-240 °C.  $^1\text{H}$  NMR (600 MHz, DMSO- $d_6$ )  $\delta$  11.73 (s, 1H, NH), 8.73 (d,  $J = 1.1$  Hz, 1H, 7-H), 7.89 (d,  $J = 5.5$  Hz, 1H, 5-H), 7.65 (dd,  $J = 2.0, 1.3$  Hz, 1H, 4-H), 7.56 – 7.42 (m, 2H, 2'-H, 6'-H), 7.41 – 7.29 (m, 3H, 3'-H, 5'-H, 2H), 7.11 (s, 1H, OH), 6.90 (dd,  $J = 5.6, 1.1$  Hz, 1H, 4'-H).  $^{13}\text{C}$  NMR (151 MHz, DMSO- $d_6$ )  $\delta$  139.33 (7-C), 137.73 (5-C), 134.95 (4-C), 133.77 (1'-C), 130.02 (4'-C), 128.33 (8'-C, 9-C), 128.00 (3'-C), 127.51 (5'-C), 125.40 (q,  $J = 287.4$  Hz, 2''-C), 115.05 (2-C), 113.43 (3-C), 75.45 (q,  $J = 28.6$  Hz, 1''-C).  $^{19}\text{F}$  NMR (565 MHz, DMSO- $d_6$ )  $\delta$  -75.20 ( $\text{CF}_3$ ). LC-MS (m/z) positive mode 293  $[\text{M} + \text{H}]^{1+}$ . Purity by HPLC-UV (254 nm)-ESI-MS 99%. HRMS (ESI-QTOF) calculated for  $\text{C}_{15}\text{H}_{11}\text{F}_3\text{N}_2\text{O}$   $[\text{M} + \text{H}]^+$ : 293.0902 found: 293.0909.

### 2,2,2-Trifluoro-1-phenyl-1-(1*H*-pyrrolo[2,3-*b*]pyridin-3-yl)ethan-1-ol (3x)<sup>[1]</sup>

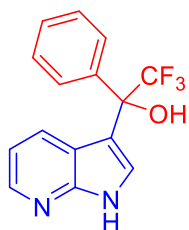

7-Azaindole (**1j**, 3.4 mmol), 2,2,2-trifluoro-1-phenylethan-1-one (**2a**, 3.70 mmol),  $\text{K}_2\text{CO}_3$  (15 mol %) and  $n\text{-Bu}_4\text{PBr}$  (15 mol %) were used for this reaction in water (5 mL). White solid; yield: 90% (1.10 g); mp = 185-186 °C.  $^1\text{H}$  NMR (600 MHz, DMSO- $d_6$ )  $\delta$  11.80 (s, 1H, NH), 8.16 (dd,  $J = 4.6, 1.6$  Hz, 1H, 6-H), 7.81 – 7.42 (m, 4H, 2'-H, 3'-H, 5'-H, 6'-H), 7.42 – 7.22 (m, 3H, 2-H, 4-H, 5-H), 7.11 (s, 1H, OH), 6.89 (dd,  $J = 8.0, 4.6$  Hz, 1H, 4'-H).  $^{13}\text{C}$  NMR (151 MHz, DMSO- $d_6$ )  $\delta$  148.70 (9-C), 143.15 (6-C), 139.33 (1'-C), 128.79 (2'-C, 6'-C), 128.32 (3'-C, 5'-C), 127.99 (4'-C), 127.34 (q,  $J = 287.7$  Hz, 2''-C), 124.09 (2-C), 117.93 (5-C), 117.93 (4-C), 115.56 (3-C), 75.80 (q,  $J =$



28.8 Hz, 1''-C). <sup>19</sup>F NMR (565 MHz, DMSO-*d*<sub>6</sub>) δ -75.08 (CF<sub>3</sub>). LC–MS (m/z) positive mode 293 [M + H]<sup>1+</sup>. Purity by HPLC-UV (254 nm)-ESI-MS 97%. HRMS (ESI-QTOF) calculated for C<sub>15</sub>H<sub>11</sub>F<sub>3</sub>N<sub>2</sub>O [M + H]<sup>+</sup>: 293.0902 found: 293.0910.

### 5-Methoxy-3-(2,2,2-trifluoro-1-(1*H*-indol-3-yl)-1-phenylethyl)-1*H*-indole (9)

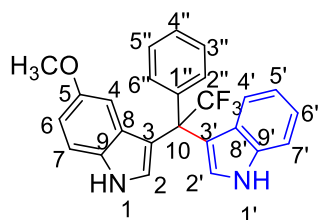

Light brown solid. yield: 81% (211 mg); <sup>1</sup>H NMR (600 MHz, DMSO-*d*<sub>6</sub>) δ 11.16 (d, *J* = 2.8 Hz, 1H, NH), 11.13 (s, 1H, NH), 7.43 (dd, *J* = 6.7, 2.9 Hz, 2H, 4-H, 7-H), 7.40 (dt, *J* = 8.2, 1.0 Hz, 1H, 4'-H), 7.36 – 7.30 (m, 3H, 2''-H, 3''-H, 7'-H), 7.28 (d, *J* = 8.8 Hz, 1H, 4''-H), 7.08 – 6.93 (m, 2H, 3''-H, 5''-H), 6.92 (s, 1H, 6-H), 6.90 (q, *J* = 3.1, 2.0 Hz, 2H, 2-H, 2'-H), 6.77 (ddd, *J* = 8.2, 7.0, 1.1 Hz, 1H, 5'-H), 6.67 (dd, *J* = 8.8, 2.4 Hz, 1H, 7'-H), 6.18 (d, *J* = 2.4 Hz, 1H, 6'-H), 3.36 (s, 3H, OCH<sub>3</sub>). <sup>13</sup>C NMR (151 MHz, DMSO) δ 152.76 (5-C), 139.26 (1''-C), 133.96 (9'-C), 131.98 (2''-C, 6''-C), 129.29 (3''-C, 5''-C), 128.11 (8-C), 128.10 (q, *J* = 286.6 Hz, CF<sub>3</sub>), 126.95 (9-C), 126.10 (8'-C), 121.15 (4''-C), 118.88 (2-C, 2'-C), 113.24 (5'-C, 6'-C), 112.37 (7'-C), 110.95 (6-C, 7-C), 105.93 (3-C, 3'-C), 103.30 (4-C), 55.38 (q, *J* = 25.9 Hz, 10-C), 55.00 (OCH<sub>3</sub>). <sup>19</sup>F NMR (565 MHz, DMSO) δ -62.36. LC–MS (m/z) positive mode 421 [M + H]<sup>1+</sup>. Purity by HPLC-UV (254 nm)-ESI-MS 96%. HRMS (ESI-QTOF) calculated for C<sub>25</sub>H<sub>19</sub>F<sub>3</sub>N<sub>2</sub>O [M + H]<sup>+</sup>: 421.1528 found: 421.1532.

### 5-Methoxy-3-(2,2,2-trifluoro-1-phenyl-1-(2-phenyl-1*H*-indol-6-yl)ethyl)-1*H*-indole (10)

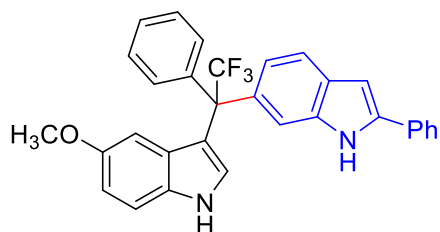

Colorless solid in 77% yield (237 mg), m.p. 234-235 °C, <sup>1</sup>H NMR (600 MHz, DMSO-*d*<sub>6</sub>) δ 11.81 (s, 1H), 11.10 (s, 1H, NH), 7.92 – 7.77 (m, 2H, Ar-H), 7.51 (d, *J* = 8.5 Hz, 1H, Ar-H), 7.44 – 7.40 (m, 2H, Ar-H), 7.38 (dd, *J* = 4.9, 1.8 Hz, 3H, 4-H, 7-H, 4'-H), 7.33 – 7.25 (m, 3H, 3''-H, 2-H, 5'-H, 6''-H), 7.23 – 7.18 (m, 1H, 4''-H), 7.03 – 6.94 (m, 1H, 5'-H), 6.90 (dd, *J* = 2.2, 0.9 Hz, 1H, 7'-H), 6.78 (d, *J* = 2.5 Hz, 1H, 3'-H), 6.71 (dd, *J* = 8.8, 2.4 Hz, 1H, 7-H), 6.07 (d, *J* = 2.3 Hz, 1H, 6-H), 3.34 (s, 3H, OCH<sub>3</sub>). <sup>13</sup>C NMR (151 MHz, DMSO) δ 152.92 (5-C), 140.18 (1''-C), 138.86 (2'-C), 136.90 (6'-C),

132.56 (Ar-C), 132.11 (2'-C, 6'-C), 129.45 (3'-C), 129.05 (5'-C), 128.24 (Ar-C), 127.76 (q,  $J = 286.1$  Hz, CF<sub>3</sub>), 127.50 (Ar-C), 126.61 (Ar-C), 125.09 (8-C, 9-C), 120.99 (8'-C, 9'-C), 119.58 (2-C), 113.65 (3-C), 112.92 (6-C, 7-C), 112.53 (5'-C, 7'-C) 111.05 (4-C), 60.18 (q,  $J = 25.9$  Hz, 10-C), 55.04 (OCH<sub>3</sub>). <sup>19</sup>F NMR (565 MHz, DMSO)  $\delta$  -59.47 (CF<sub>3</sub>). LC-MS (m/z) positive mode 497 [M + H]<sup>1+</sup>. Purity by HPLC-UV (254 nm)-ESI-MS 96%. HRMS (ESI-QTOF) calculated for C<sub>31</sub>H<sub>23</sub>F<sub>3</sub>N<sub>2</sub>O [M + H]<sup>1+</sup>: 497.1841 found: 497.1843.

### 5-Fluoro-3-(2,2,2-trifluoro-1-(5-methoxy-1*H*-indol-3-yl)-1-phenylethyl)-1*H*-indole (11)

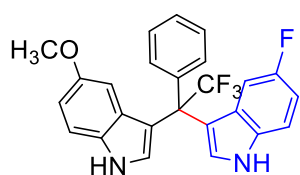

Brown solid, yield: 80% (217 mg), <sup>1</sup>H NMR (600 MHz, DMSO-*d*<sub>6</sub>)  $\delta$  11.31 (s, 1H, NH), 11.08 (s, 1H, NH), 7.41 (p,  $J = 4.8, 4.2$  Hz, 3H, 4-H, 7-H, 7'-H), 7.38 – 7.32 (m, 3H, 4''-H, 2''-H, 6''-H), 7.29 (d,  $J = 8.8$  Hz, 1H, 4''-H), 7.04 (d,  $J = 2.7$  Hz, 1H, 4'-H), 6.95 (d,  $J = 2.6$  Hz, 1H, 6-H), 6.88 (td,  $J = 9.0, 2.5$  Hz, 1H, 6'-H), 6.68 (dd,  $J = 8.8, 2.4$  Hz, 1H, 7'-C), 6.47 – 6.36 (m, 1H, 2-H), 6.15 (d,  $J = 2.5$  Hz, 1H, 2'-C), 3.36 (s, 3H OCH<sub>3</sub>). <sup>13</sup>C NMR (151 MHz, DMSO)  $\delta$  157.28 (5'-C), 152.83 (5-C), 138.91 (1''-C), 133.63 91 (4''-C), 132.01 91 (2''-C, 6''-C), 129.24 (3'-C, 5''-C), 128.78 (8-C, 128.26 (q,  $J = 285.9$  Hz, CF<sub>3</sub>), 127.87 (8'-C, 9-C), 126.94 (9'-C), 126.47 (2-C, 2'-C), 112.47 (3-C, 3'-C), 111.05 (6-C, 7-C, 7'-C), 105.66 (4'-C, 6'-C), 103.16 (4-C), 55.1 (q,  $J = 25.9$  Hz, Ar-F), 55.01 (OCH<sub>3</sub>). <sup>19</sup>F NMR (565 MHz, DMSO)  $\delta$  -62.58 (CF<sub>3</sub>), -124.59, -124.60, -124.61, -124.61, -124.63 (5'-C). LC-MS (m/z) positive mode 439 [M + H]<sup>1+</sup>. Purity by HPLC-UV (254 nm)-ESI-MS 97%. HRMS (ESI-QTOF) calculated for C<sub>25</sub>H<sub>18</sub>F<sub>4</sub>N<sub>2</sub>O [M + H]<sup>1+</sup>: 439.1434 found: 439.1437.

### **X-ray crystal structure determination**

The crystallographic studies have been performed on a Bruker X8-KappaApexII diffractometer (area detector Apex II) using graphite monochromated Mo K $\alpha$  ( $\lambda = 0.71073$  Å) irradiation. The diffractometer was equipped with a low-temperature device (Bruker Kryoflex I (Bruker AXS); 100(2) K). Intensities were measured by fine-slicing  $\varphi$  and  $\omega$ -scans and corrected for background, polarization and Lorentz effects. An empirical absorption correction was applied for all data sets. The structures were solved by the intrinsic phasing procedure implemented in ShelxT<sup>[2]</sup> and refined anisotropically by the least-squares procedure implemented in ShelxL.<sup>[3]</sup> Hydrogen atoms were included isotropically using the riding model on the bound carbon atoms. CCDC-1973322 contains the supplementary crystallographic data for this paper, which can be obtained free of charge from The Cambridge Crystallographic Data Centre via [www.ccdc.cam.ac.uk/data\\_request/cif](http://www.ccdc.cam.ac.uk/data_request/cif).

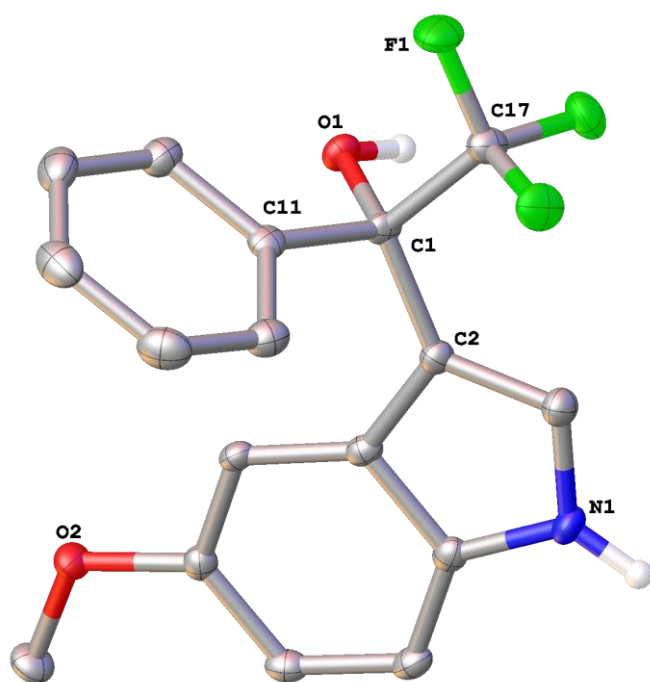

**Figure S1.** ORTEP-type plot of the molecular structure of **3a** (asymmetric unit) in the single crystal lattice at 100(2) K. The thermal ellipsoids are set at 50% probability.

**Table S1** Crystal data and structure refinement for 6141f **3a**

|                                      |                                                                 |
|--------------------------------------|-----------------------------------------------------------------|
| Identification code                  | GPHARM89, YAZH-K921 // GXray6141f                               |
| Crystal Habitus                      | clear colourless plate                                          |
| Device Type                          | Bruker X8-KappaApexII                                           |
| Empirical formula                    | C <sub>17</sub> H <sub>14</sub> NO <sub>2</sub> F <sub>3</sub>  |
|                                      |                                                                 |
| Moiety formula                       | C <sub>17</sub> H <sub>14</sub> F <sub>3</sub> N O <sub>2</sub> |
| Formula weight                       | 321.29                                                          |
| Temperature/K                        | 100                                                             |
| Crystal system                       | monoclinic                                                      |
| Space group                          | P2 <sub>1</sub> /c                                              |
| a/Å                                  | 9.6862(13)                                                      |
| b/Å                                  | 12.4199(16)                                                     |
| c/Å                                  | 12.3024(17)                                                     |
| α/°                                  | 90                                                              |
| β/°                                  | 97.169(4)                                                       |
| γ/°                                  | 90                                                              |
| Volume/Å <sup>3</sup>                | 1468.4(3)                                                       |
| Z                                    | 4                                                               |
| ρ <sub>calc</sub> /g/cm <sup>3</sup> | 1.453                                                           |
| μ/mm <sup>-1</sup>                   | 0.121                                                           |
| F(000)                               | 664.0                                                           |
| Crystal size/mm <sup>3</sup>         | 0.35 × 0.25 × 0.16                                              |
| Absorption correction                | empirical                                                       |
|                                      |                                                                 |
| Tmin; Tmax                           | 0.5856; 0.7462                                                  |
|                                      |                                                                 |
| Radiation                            | MoKα (λ = 0.71073)                                              |
| 2θ range for data collection/°       | 5.36 to 55.998°                                                 |
| Completeness to theta                | 0.999                                                           |
| Index ranges                         | -12 ≤ h ≤ 12, -16 ≤ k ≤ 16, -16 ≤ l ≤ 16                        |
| Reflections collected                | 22299                                                           |
| Independent reflections              | 3545 [R <sub>int</sub> = 0.0814, R <sub>sigma</sub> = 0.0516]   |
| Data/restraints/parameters           | 3545/0/210                                                      |
| Goodness-of-fit on F <sup>2</sup>    | 1.016                                                           |
| Final R indexes [I>=2σ (I)]          | R <sub>1</sub> = 0.0418, wR <sub>2</sub> = 0.0959               |

|                                                |                                  |
|------------------------------------------------|----------------------------------|
| Final R indexes [all data]                     | $R_1 = 0.0610$ , $wR_2 = 0.1071$ |
| Largest diff. peak/hole / $e \text{ \AA}^{-3}$ | 0.35/-0.34                       |

**Table S2** Bond Lengths for 6141f **3a**

| Atom | Atom | Length/ $\text{\AA}$ |  | Atom | Atom | Length/ $\text{\AA}$ |
|------|------|----------------------|--|------|------|----------------------|
| F1   | C17  | 1.3305(18)           |  | C3   | C4   | 1.415(2)             |
| F2   | C17  | 1.3443(19)           |  | C3   | C6   | 1.397(2)             |
| F3   | C17  | 1.3461(18)           |  | C4   | C9   | 1.388(2)             |
| O1   | C1   | 1.4320(17)           |  | C6   | C7   | 1.383(2)             |
| O2   | C7   | 1.3923(18)           |  | C7   | C8   | 1.407(2)             |
| O2   | C10  | 1.4354(18)           |  | C8   | C9   | 1.381(2)             |
| N1   | C4   | 1.3802(19)           |  | C11  | C12  | 1.390(2)             |
| N1   | C5   | 1.369(2)             |  | C11  | C16  | 1.394(2)             |
| C1   | C2   | 1.507(2)             |  | C12  | C13  | 1.391(2)             |
| C1   | C11  | 1.527(2)             |  | C13  | C14  | 1.386(2)             |
| C1   | C17  | 1.540(2)             |  | C14  | C15  | 1.384(2)             |
| C2   | C3   | 1.442(2)             |  | C15  | C16  | 1.387(2)             |
| C2   | C5   | 1.373(2)             |  |      |      |                      |

**Table S3 Bond Angles for 6141f 3a**

| Atom | Atom | Atom | Angle/°    |  | Atom | Atom | Atom | Angle/°    |
|------|------|------|------------|--|------|------|------|------------|
| C7   | O2   | C10  | 117.63(12) |  | O2   | C7   | C8   | 123.09(13) |
| C5   | N1   | C4   | 108.96(12) |  | C6   | C7   | O2   | 115.10(13) |
| O1   | C1   | C2   | 110.74(12) |  | C6   | C7   | C8   | 121.79(14) |
| O1   | C1   | C11  | 107.33(12) |  | C9   | C8   | C7   | 120.27(14) |
| O1   | C1   | C17  | 105.65(12) |  | C8   | C9   | C4   | 118.18(14) |
| C2   | C1   | C11  | 112.85(12) |  | C12  | C11  | C1   | 119.82(13) |
| C2   | C1   | C17  | 111.55(12) |  | C12  | C11  | C16  | 118.93(15) |
| C11  | C1   | C17  | 108.38(12) |  | C16  | C11  | C1   | 121.20(13) |
| C3   | C2   | C1   | 123.76(13) |  | C13  | C12  | C11  | 120.58(15) |
| C5   | C2   | C1   | 129.42(14) |  | C14  | C13  | C12  | 120.15(16) |
| C5   | C2   | C3   | 106.74(13) |  | C15  | C14  | C13  | 119.46(16) |
| C4   | C3   | C2   | 106.41(13) |  | C14  | C15  | C16  | 120.60(16) |
| C6   | C3   | C2   | 134.44(14) |  | C15  | C16  | C11  | 120.25(15) |
| C6   | C3   | C4   | 119.15(13) |  | F1   | C17  | F2   | 106.94(12) |
| N1   | C4   | C3   | 107.87(13) |  | F1   | C17  | F3   | 107.14(12) |
| N1   | C4   | C9   | 130.07(14) |  | F1   | C17  | C1   | 111.63(13) |
| C9   | C4   | C3   | 122.06(14) |  | F2   | C17  | F3   | 107.00(12) |
| N1   | C5   | C2   | 110.02(13) |  | F2   | C17  | C1   | 111.46(13) |
| C7   | C6   | C3   | 118.51(13) |  | F3   | C17  | C1   | 112.36(12) |

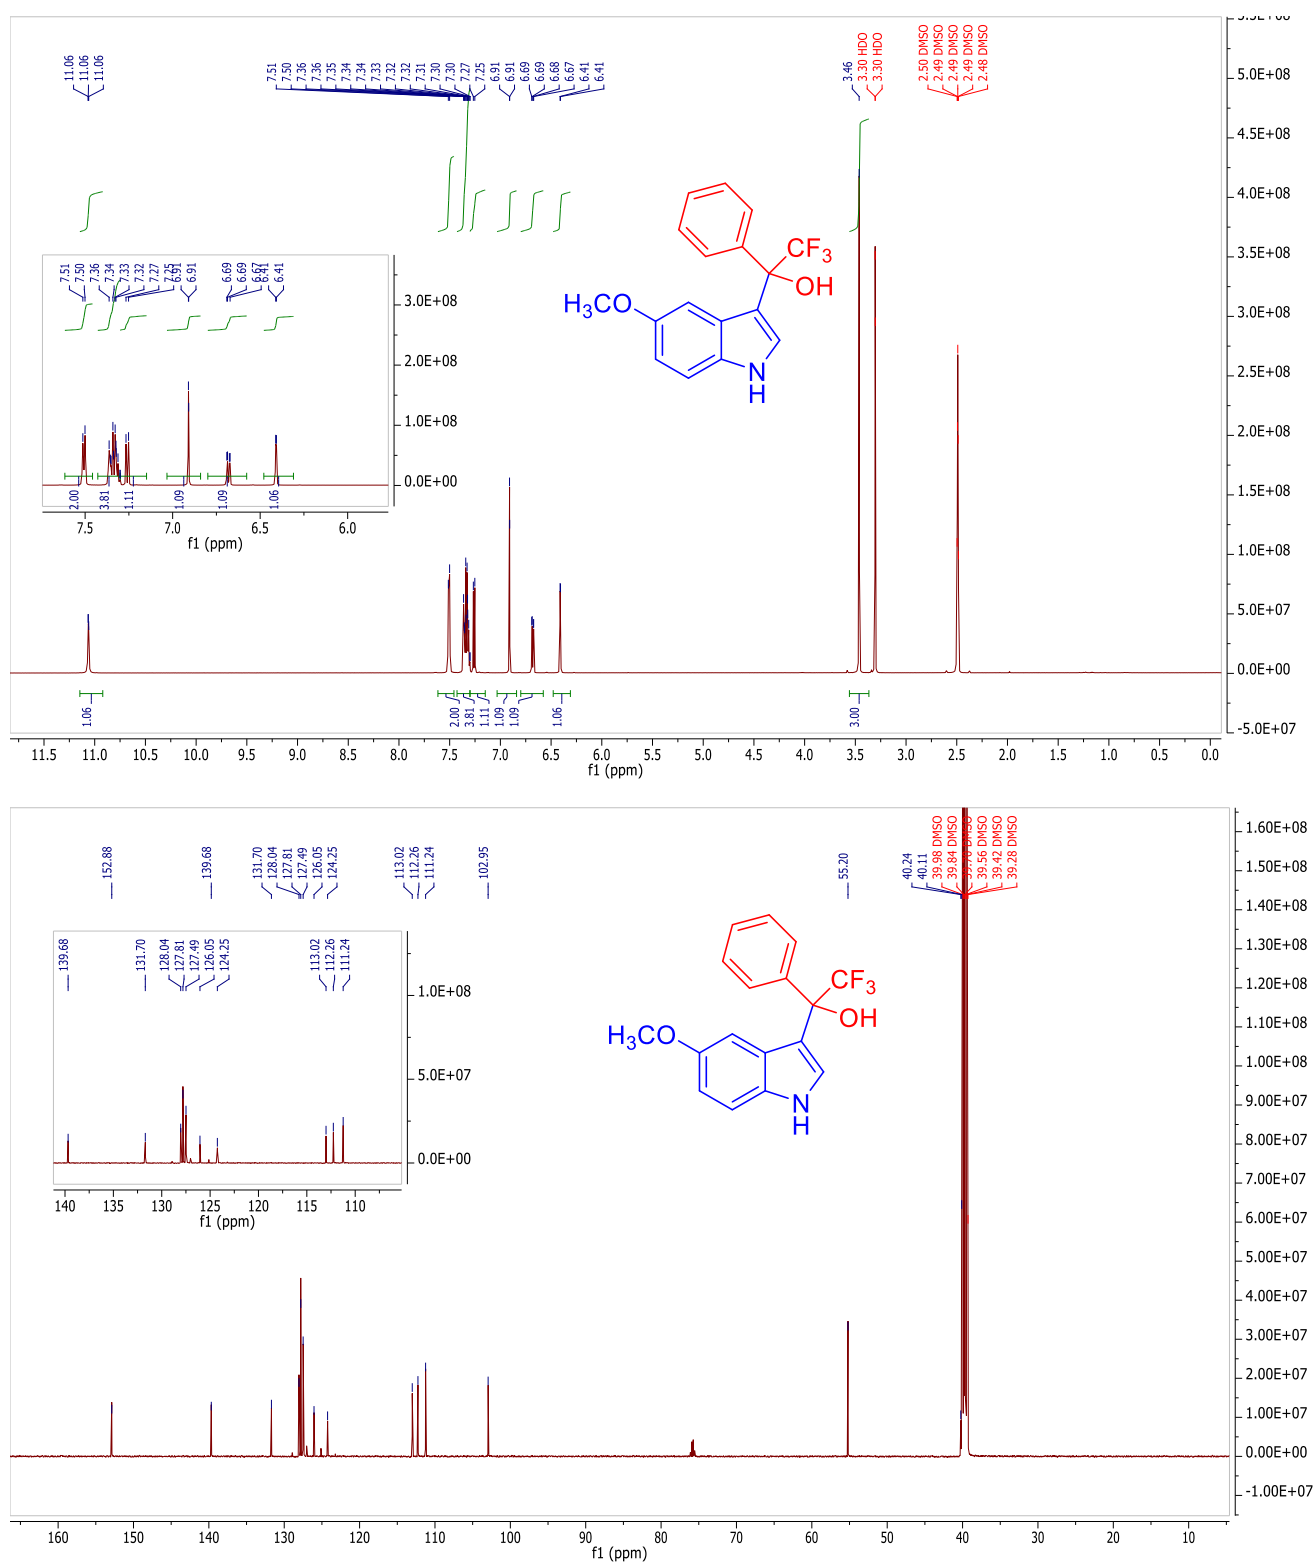

**Figure S2.** <sup>1</sup>H (600 MHz) and <sup>13</sup>C (151 MHz) Spectra of 2,2,2-trifluoro-1-(5-methoxy-1*H*-indol-3-yl)-1-phenylethan-1 (**3a**)



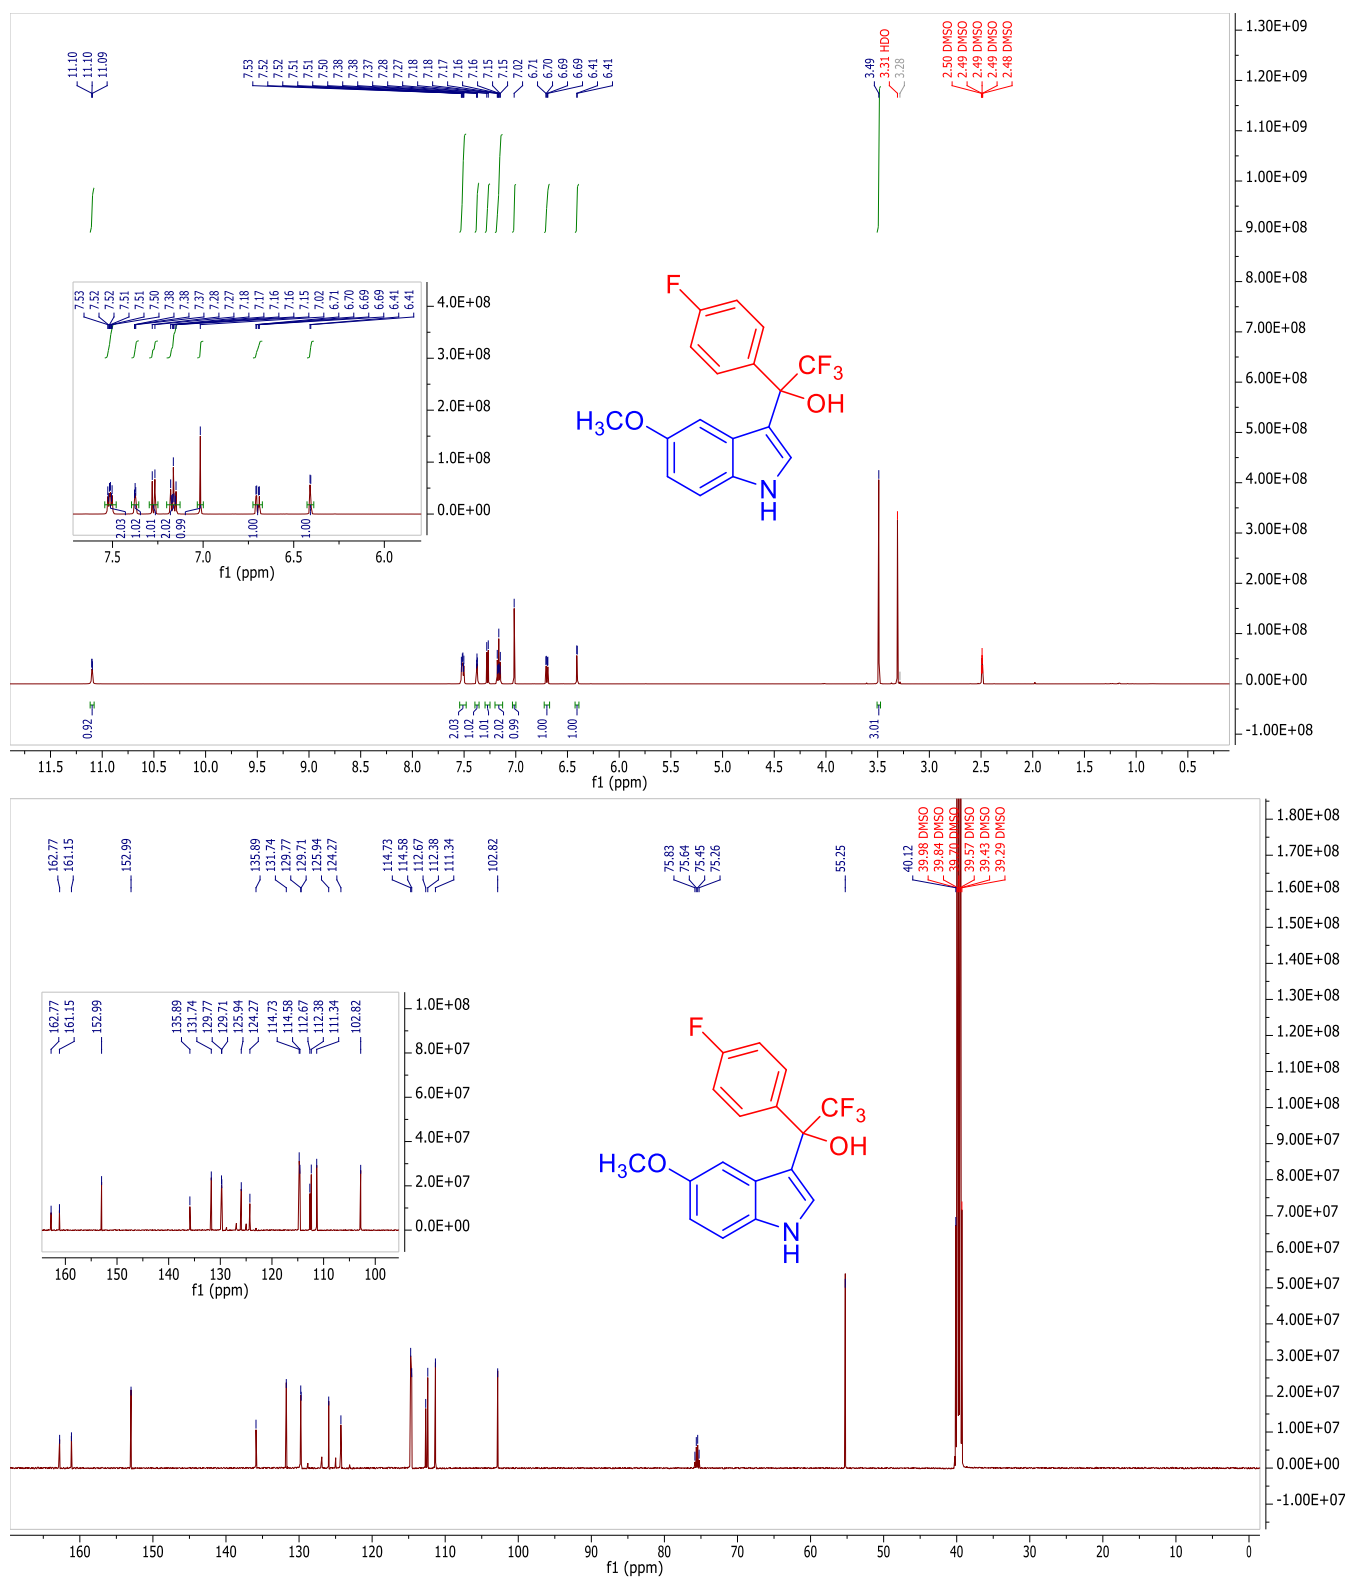

**Figure S3.** <sup>1</sup>H (600 MHz) and <sup>13</sup>C (151 MHz) Spectra of 2,2,2-trifluoro-1-(4-fluorophenyl)-1-(5-methoxy-1*H*-indol-3-yl)ethan-1-ol (**3b**)

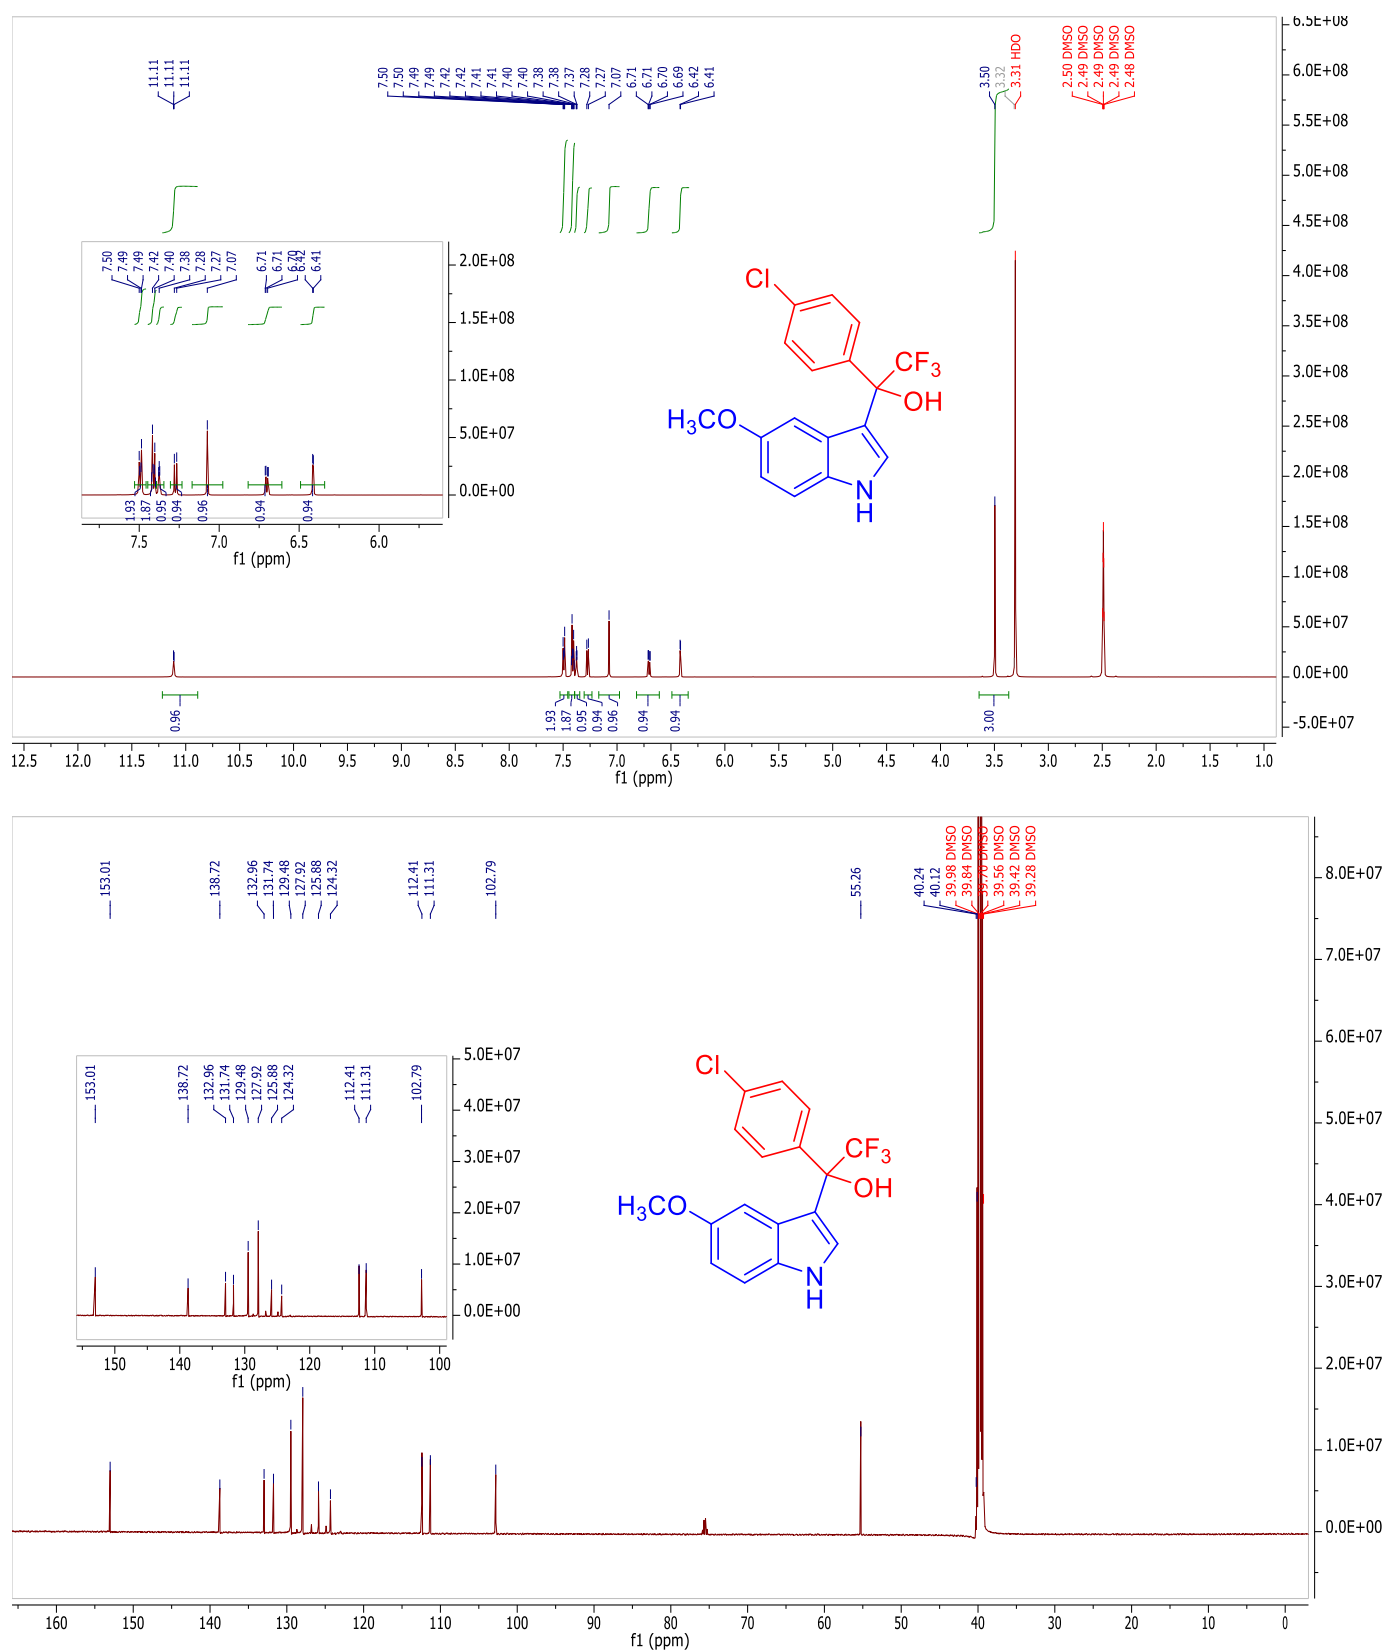

**Figure S4.** <sup>1</sup>H (600 MHz) and <sup>13</sup>C (151 MHz) Spectra of 1-(4-chlorophenyl)-2,2,2-trifluoro-1-(5-methoxy-1*H*-indol-3-yl)ethan-1-ol (**3c**)

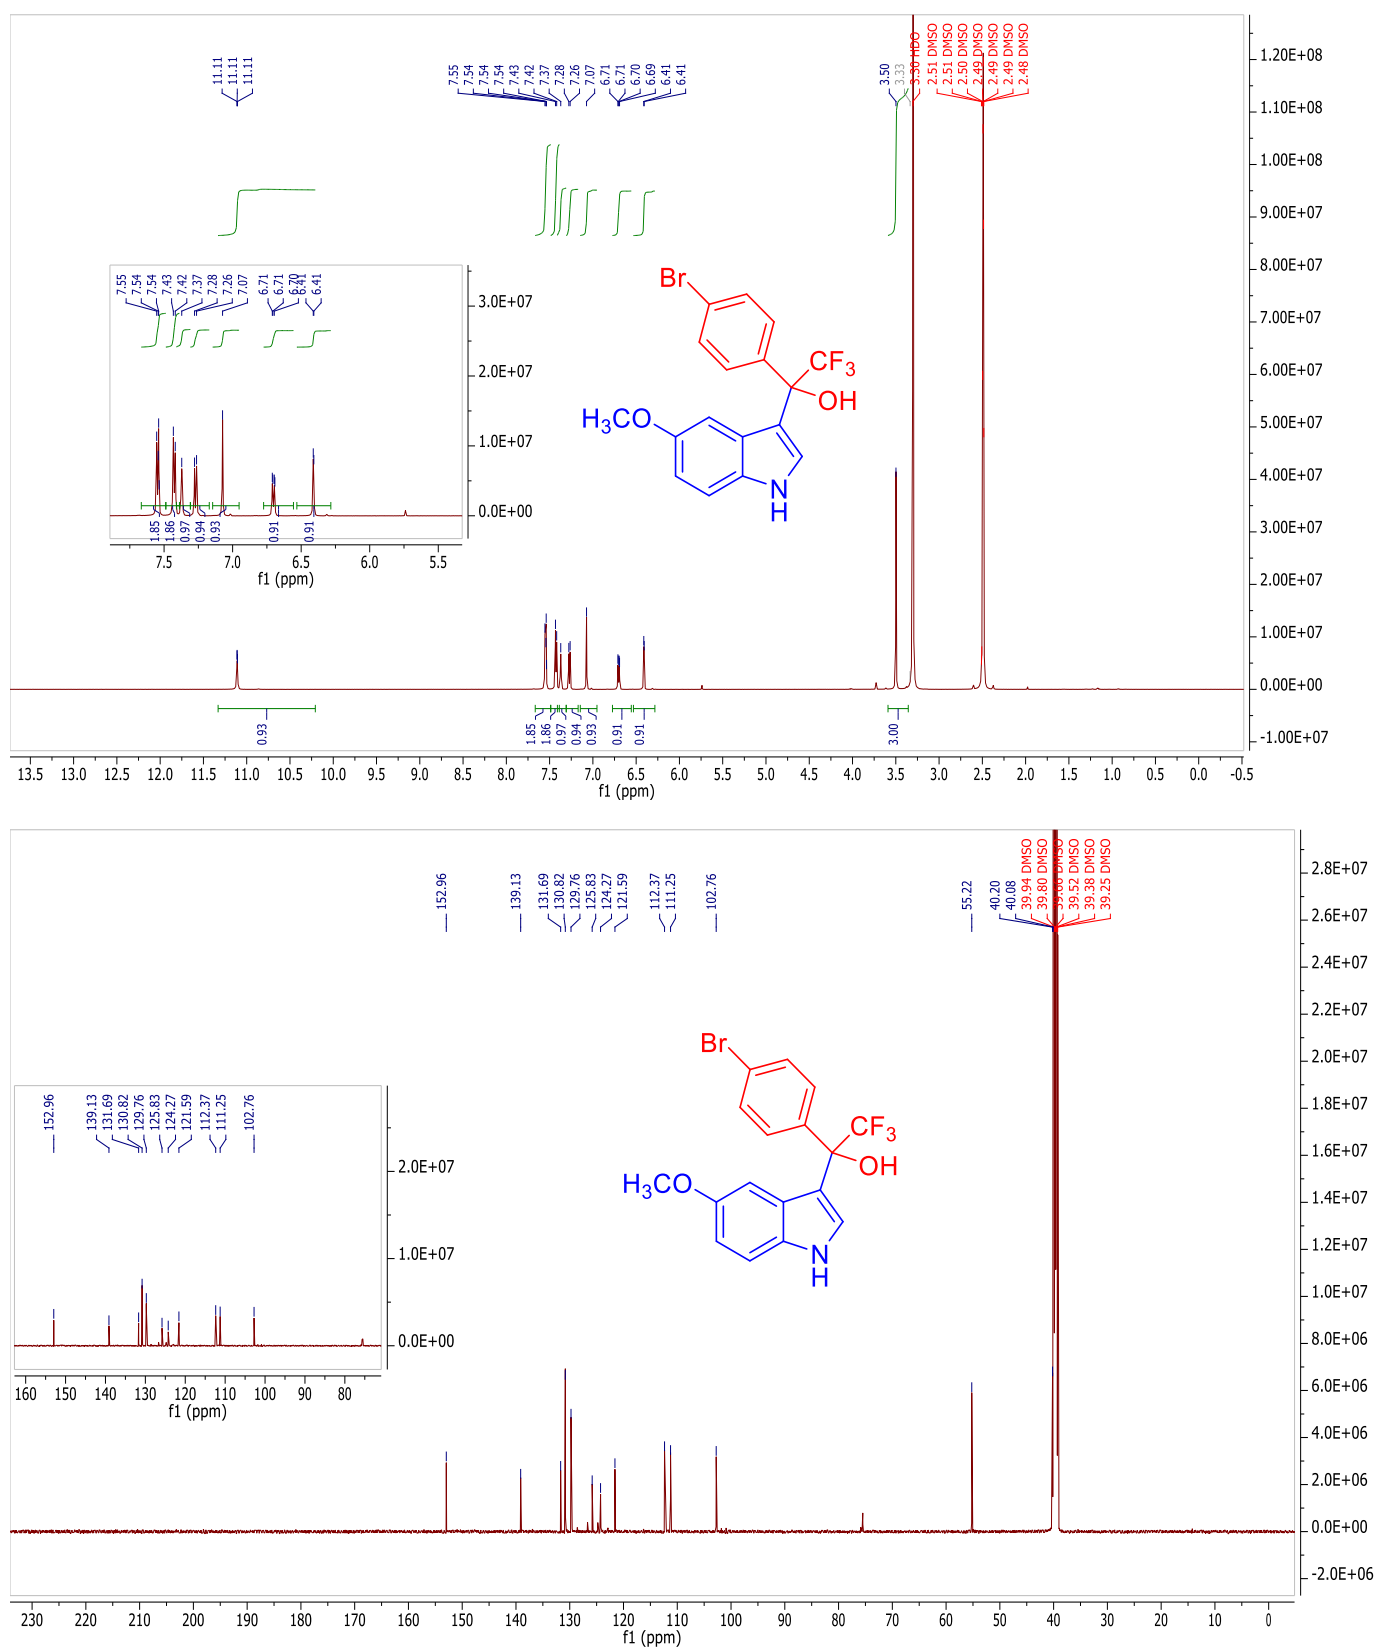

**Figure S5.** <sup>1</sup>H (600 MHz) and <sup>13</sup>C (151 MHz) Spectra of 1-(4-bromophenyl)-2,2,2-trifluoro-1-(5-methoxy-1*H*-indol-3-yl)ethan-1-ol (**3d**)

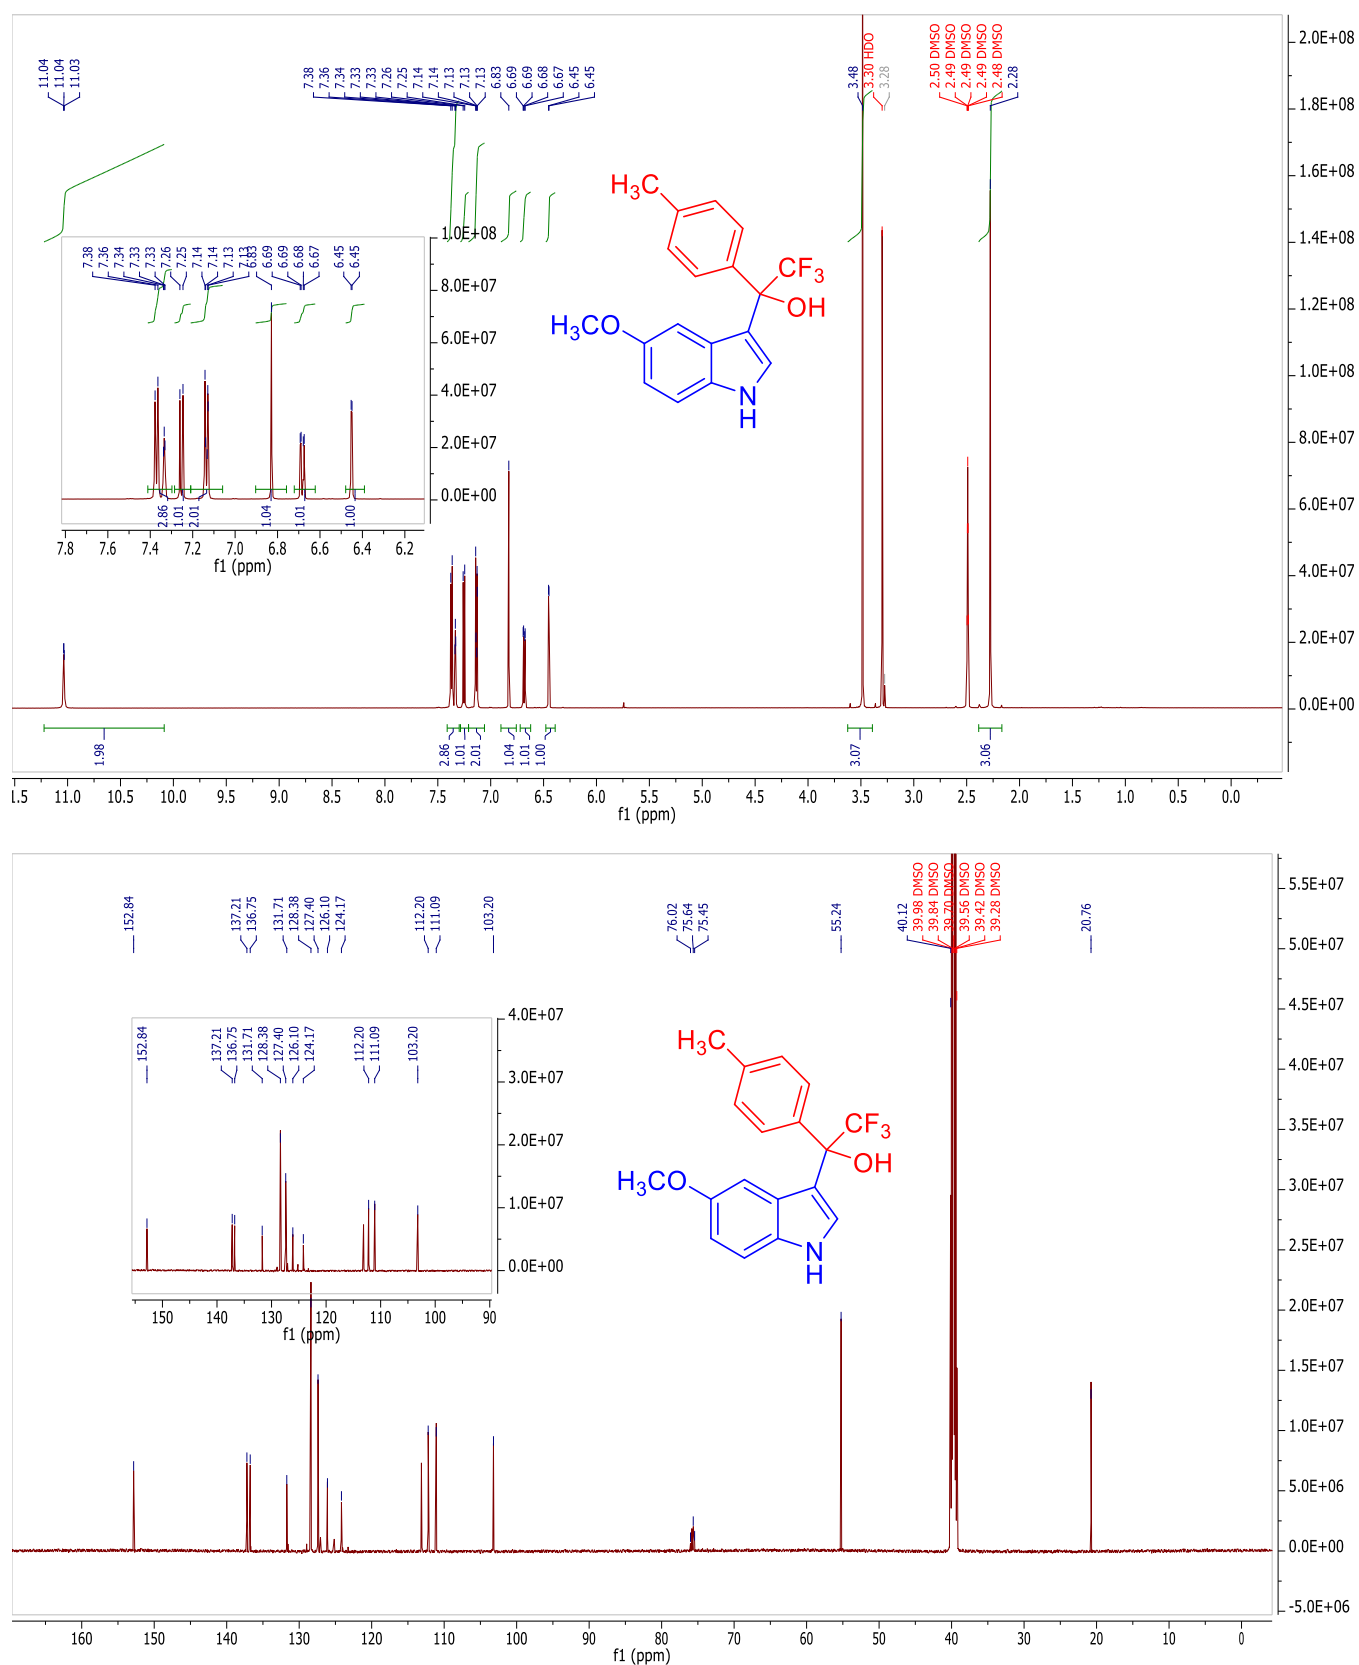

**Figure S6.** <sup>1</sup>H (600 MHz) and <sup>13</sup>C (151 MHz) Spectra of 2,2,2-trifluoro-1-(5-methoxy-1*H*-indol-3-yl)-1-(*p*-tolyl)ethan-1-ol (**3e**)

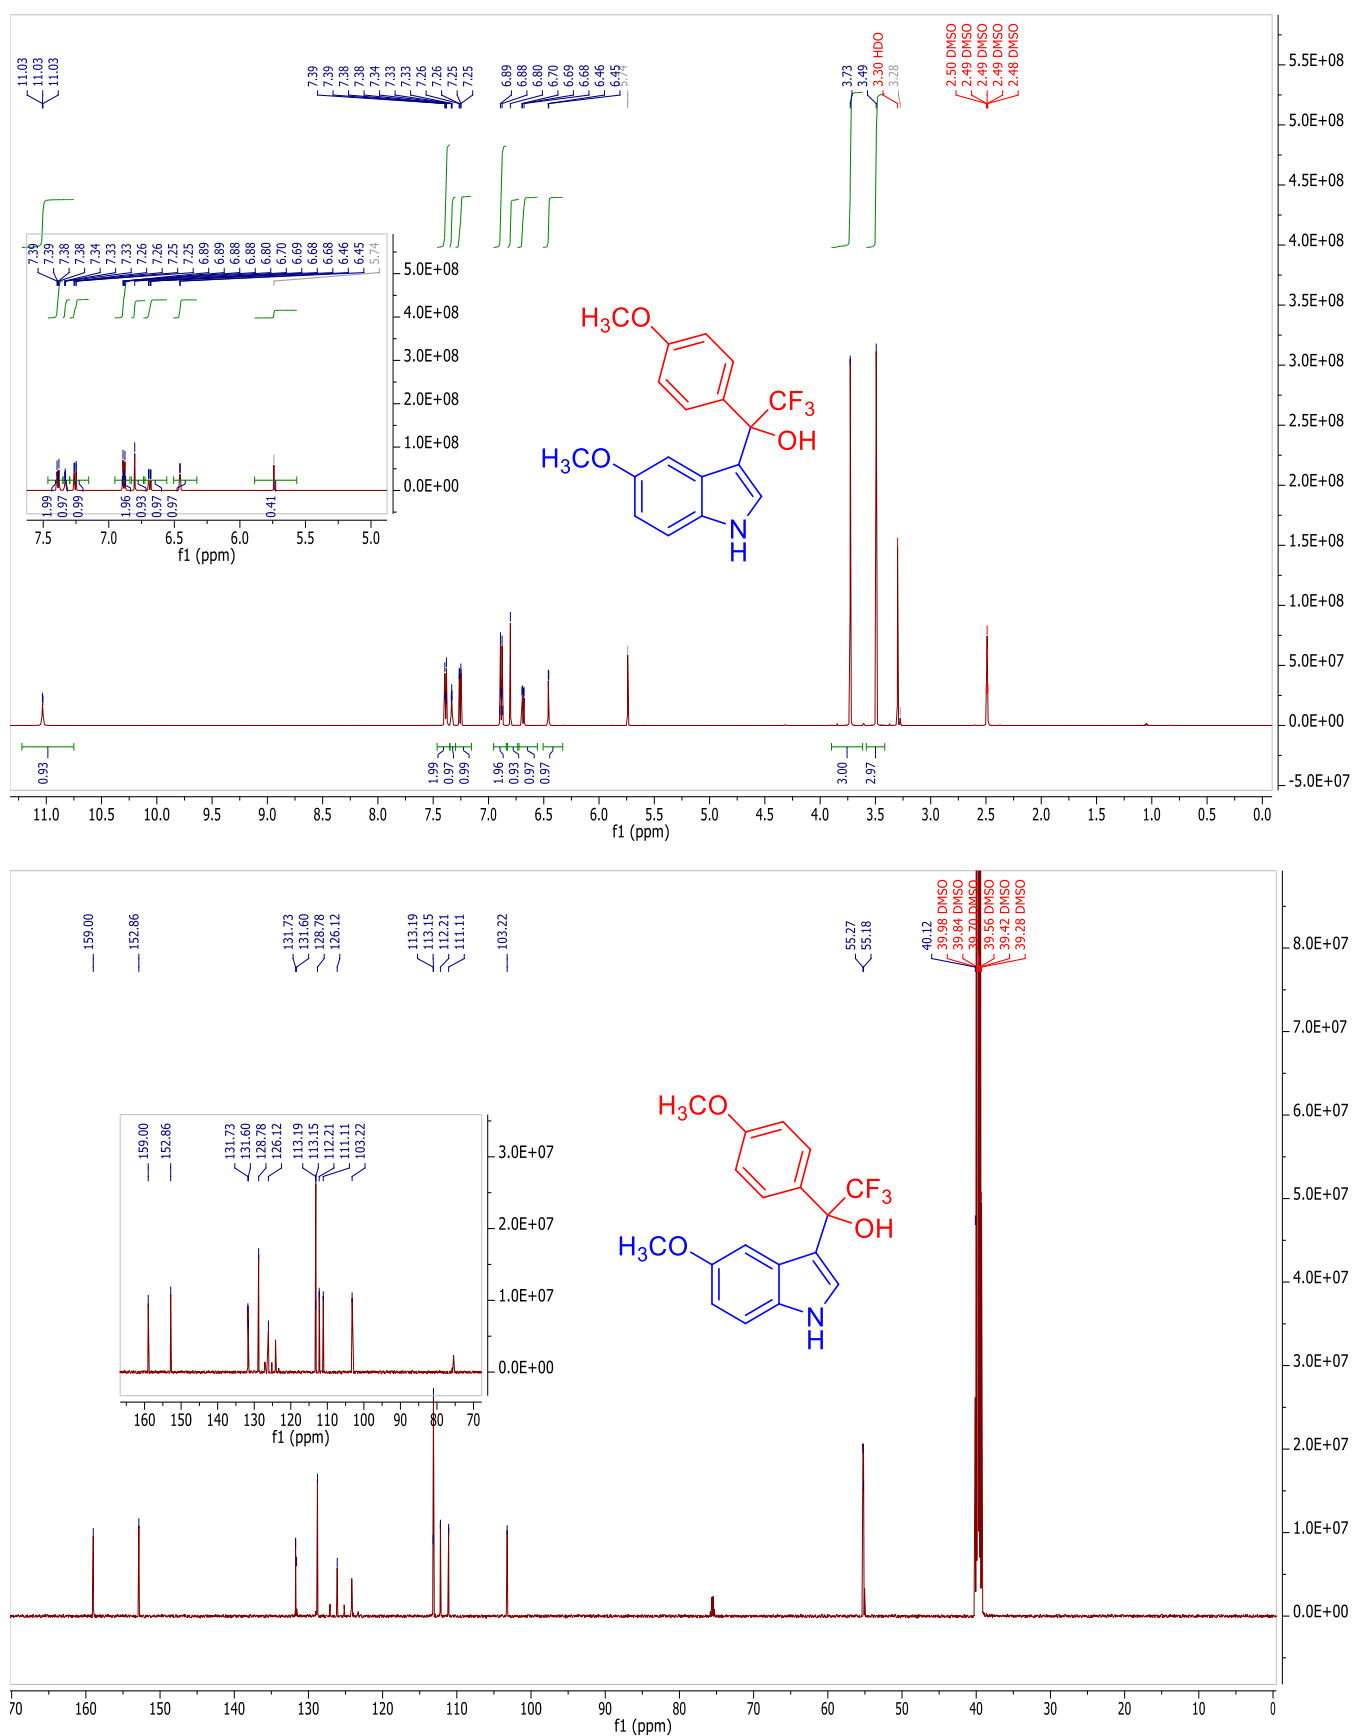

**Figure S7.** <sup>1</sup>H (600 MHz) and <sup>13</sup>C (151 MHz) Spectra of 2,2,2-trifluoro-1-(5-methoxy-1*H*-indol-3-yl)-1-(4-methoxyphenyl)ethan-1-ol (**3f**)

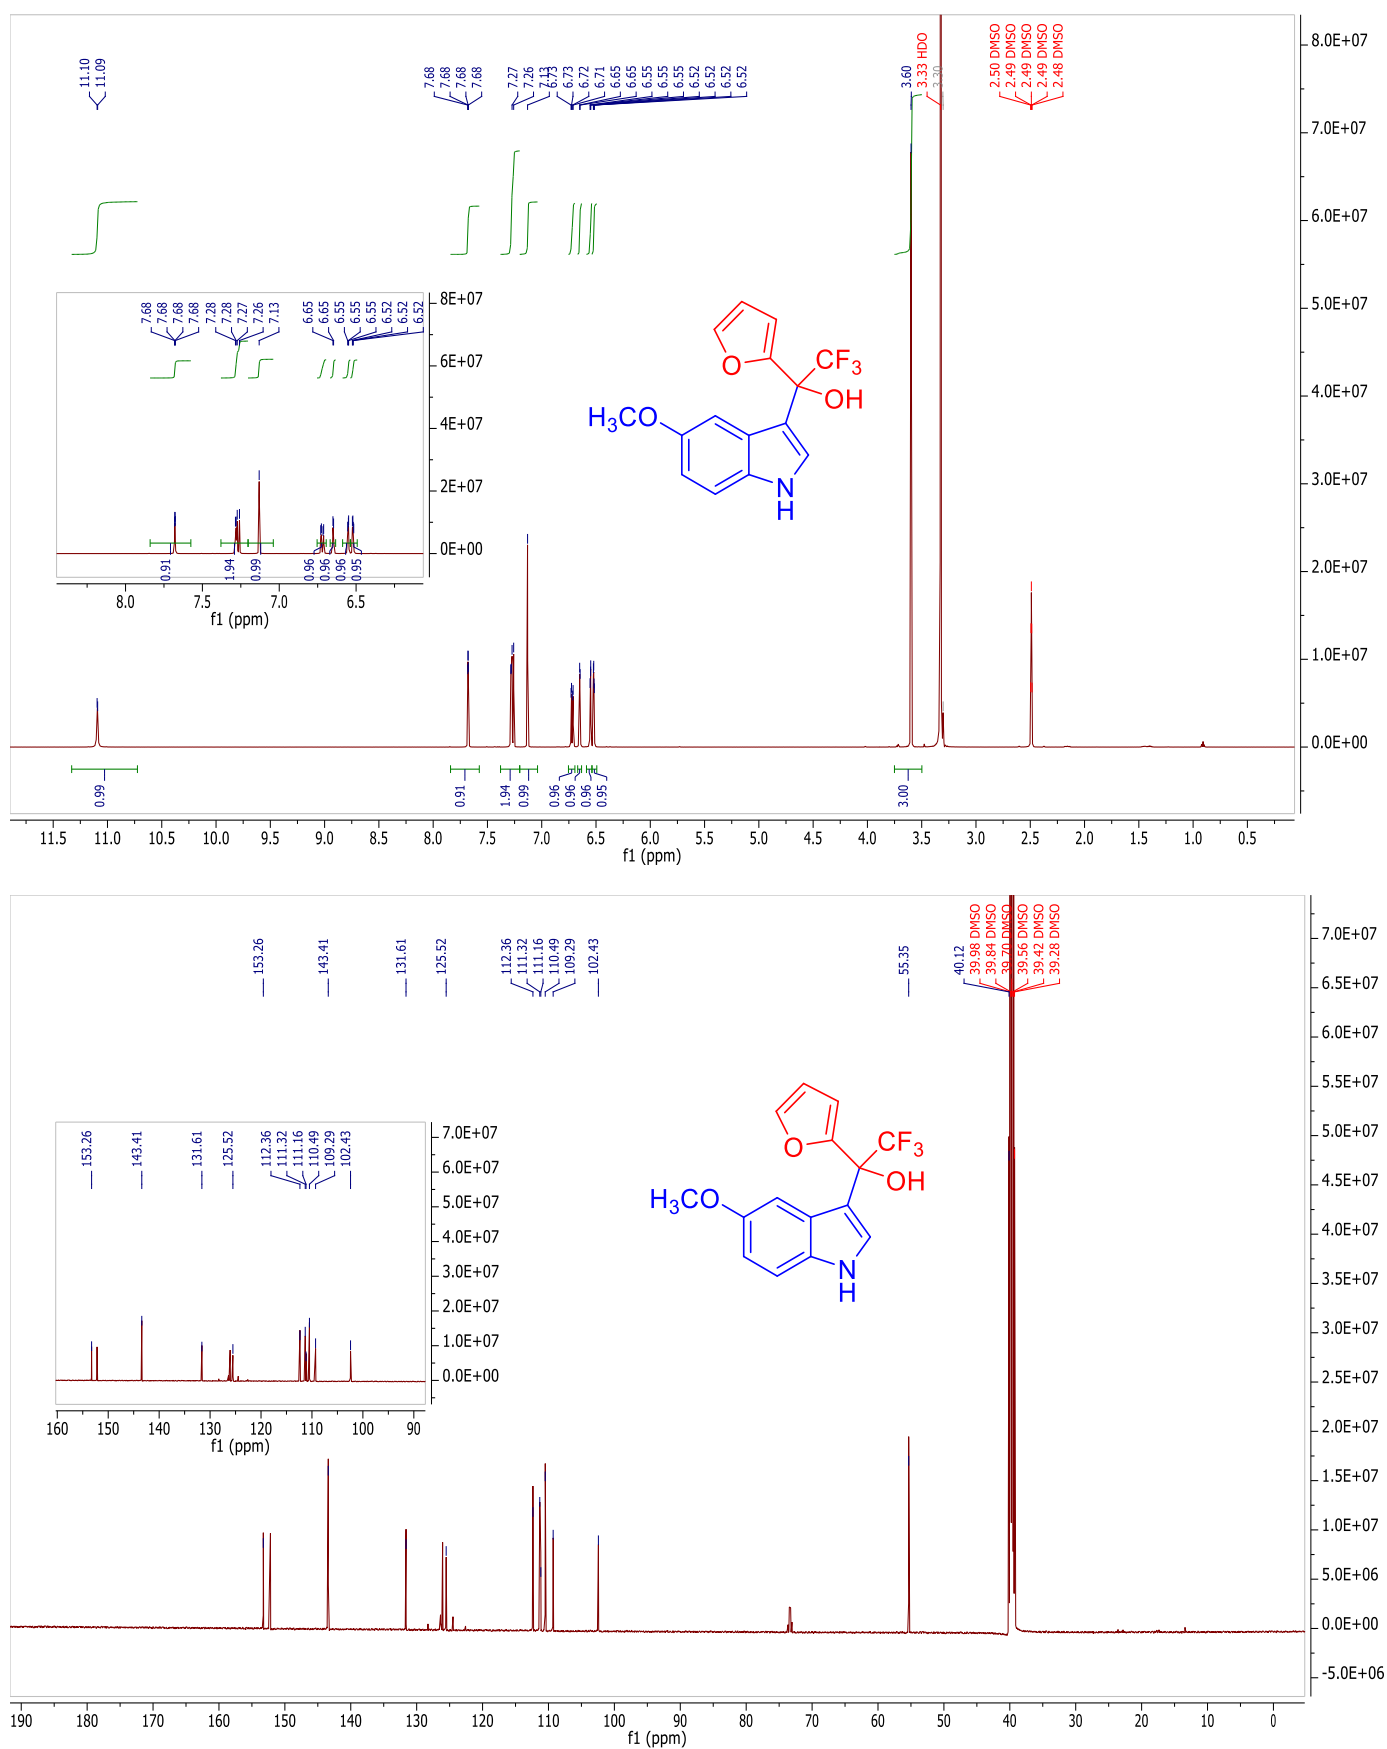

**Figure S8.** <sup>1</sup>H (600 MHz) and <sup>13</sup>C (151 MHz) Spectra of 2,2,2-trifluoro-1-(furan-2-yl)-1-(5-methoxy-1*H*-indol-3-yl)ethan-1-ol (**3g**)

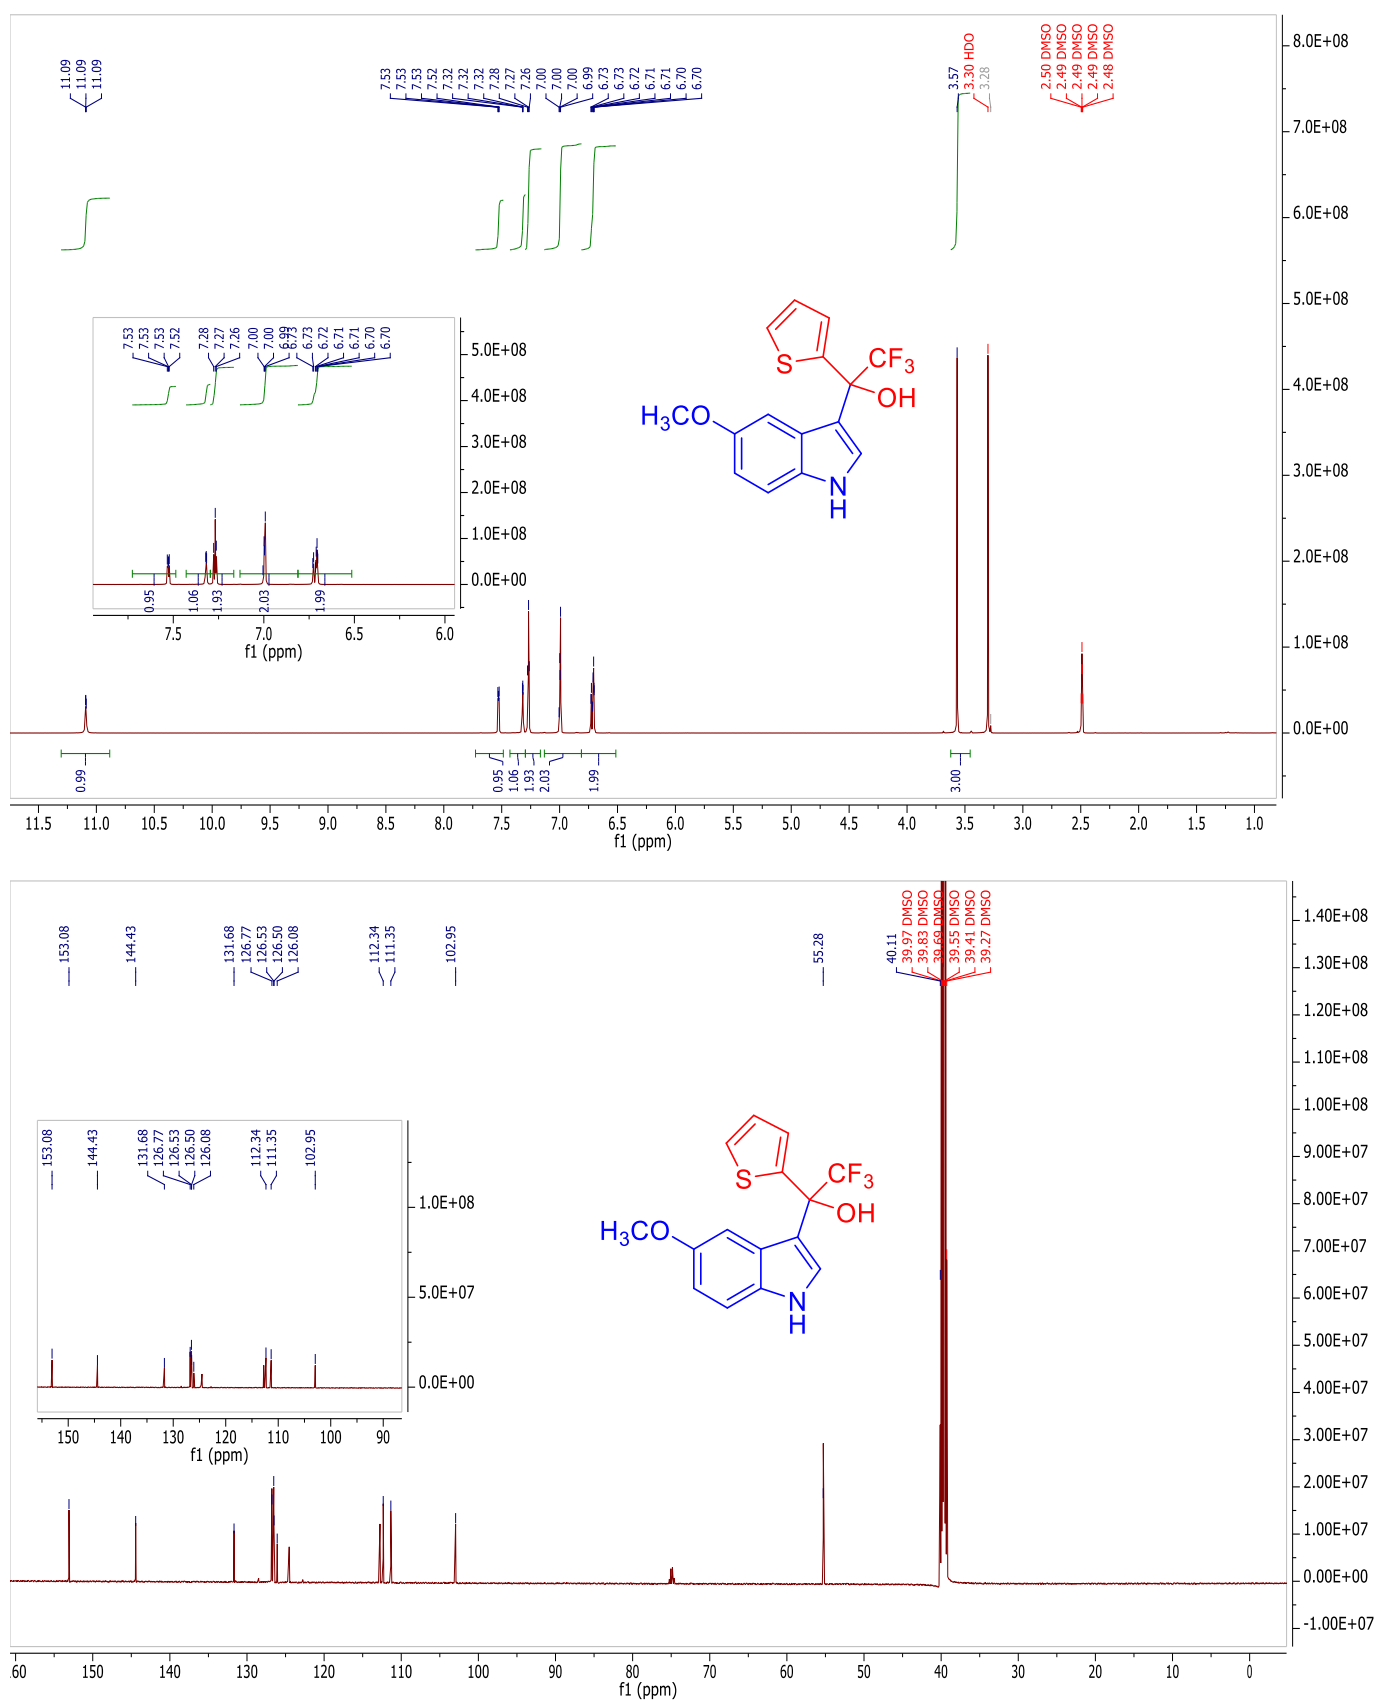

**Figure S9.** <sup>1</sup>H (600 MHz) and <sup>13</sup>C (151 MHz) Spectra of 2,2,2-trifluoro-1-(5-methoxy-1*H*-indol-3-yl)-1-(thiophen-2-yl)ethan-1-ol (**3h**)

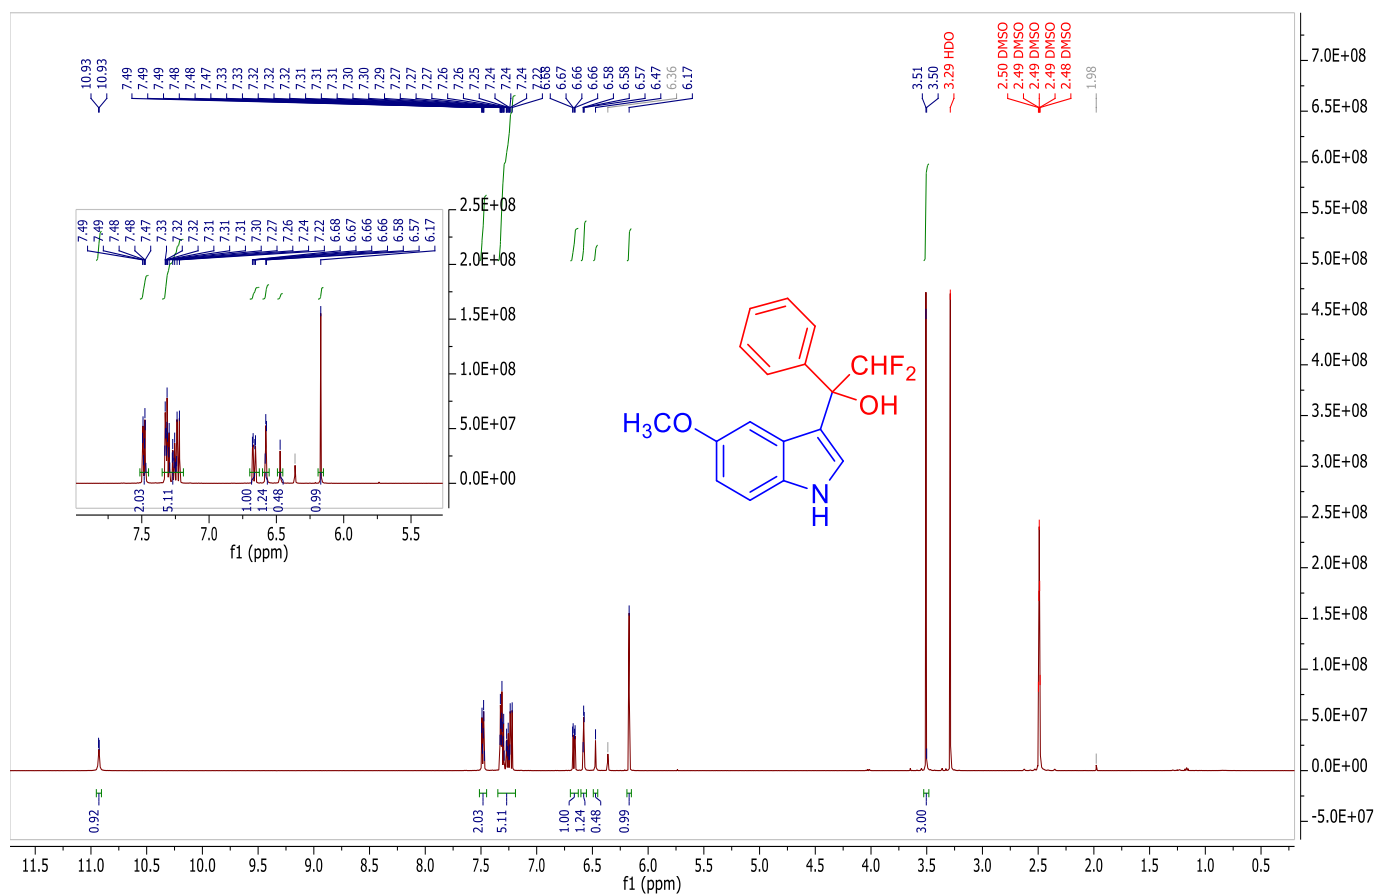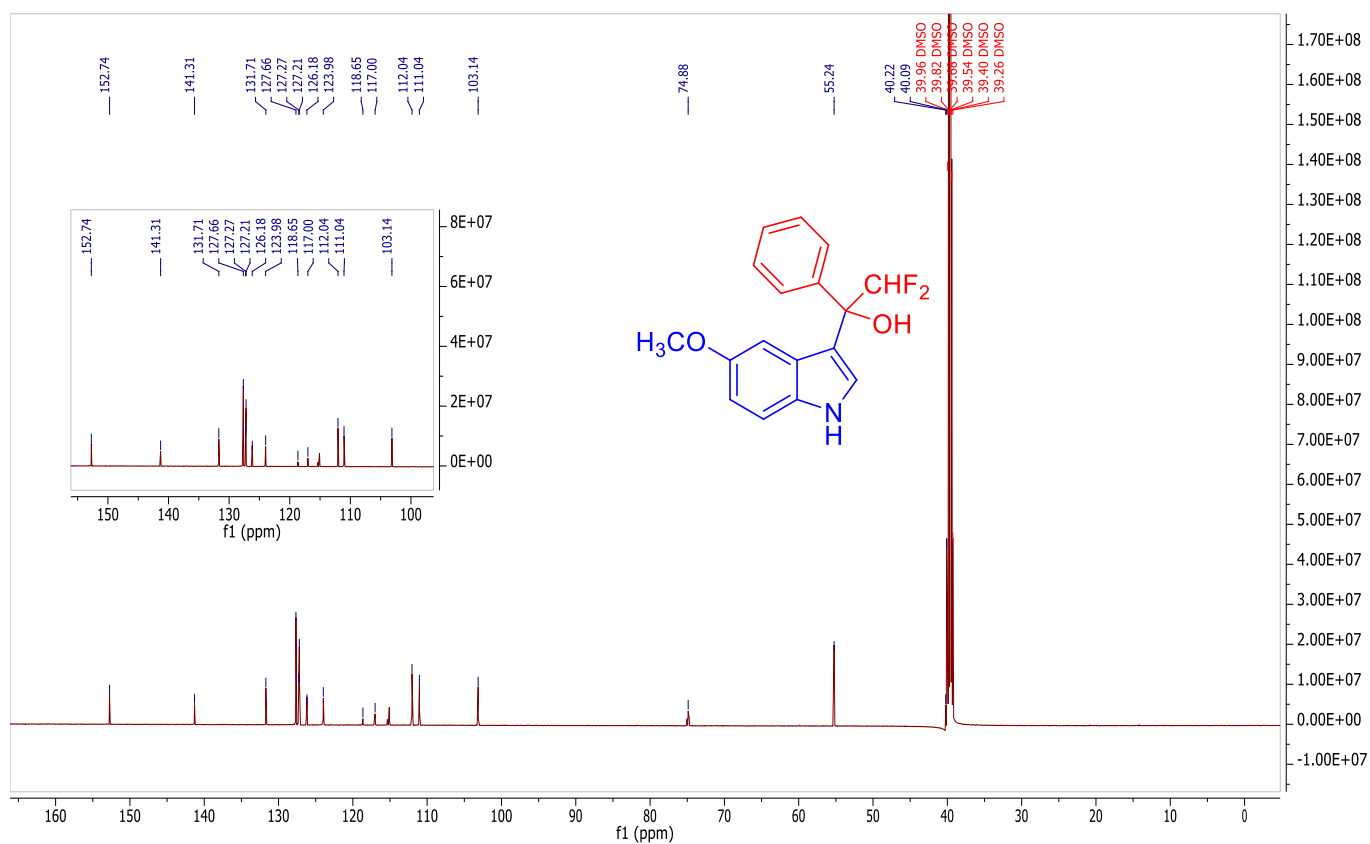

**Figure S10.**  $^1\text{H}$  (600 MHz) and  $^{13}\text{C}$  (151 MHz) Spectra of 2,2-tifluoro-1-(5-methoxy-1*H*-indol-3-yl)-1-phenylethan-1-ol (**3i**)



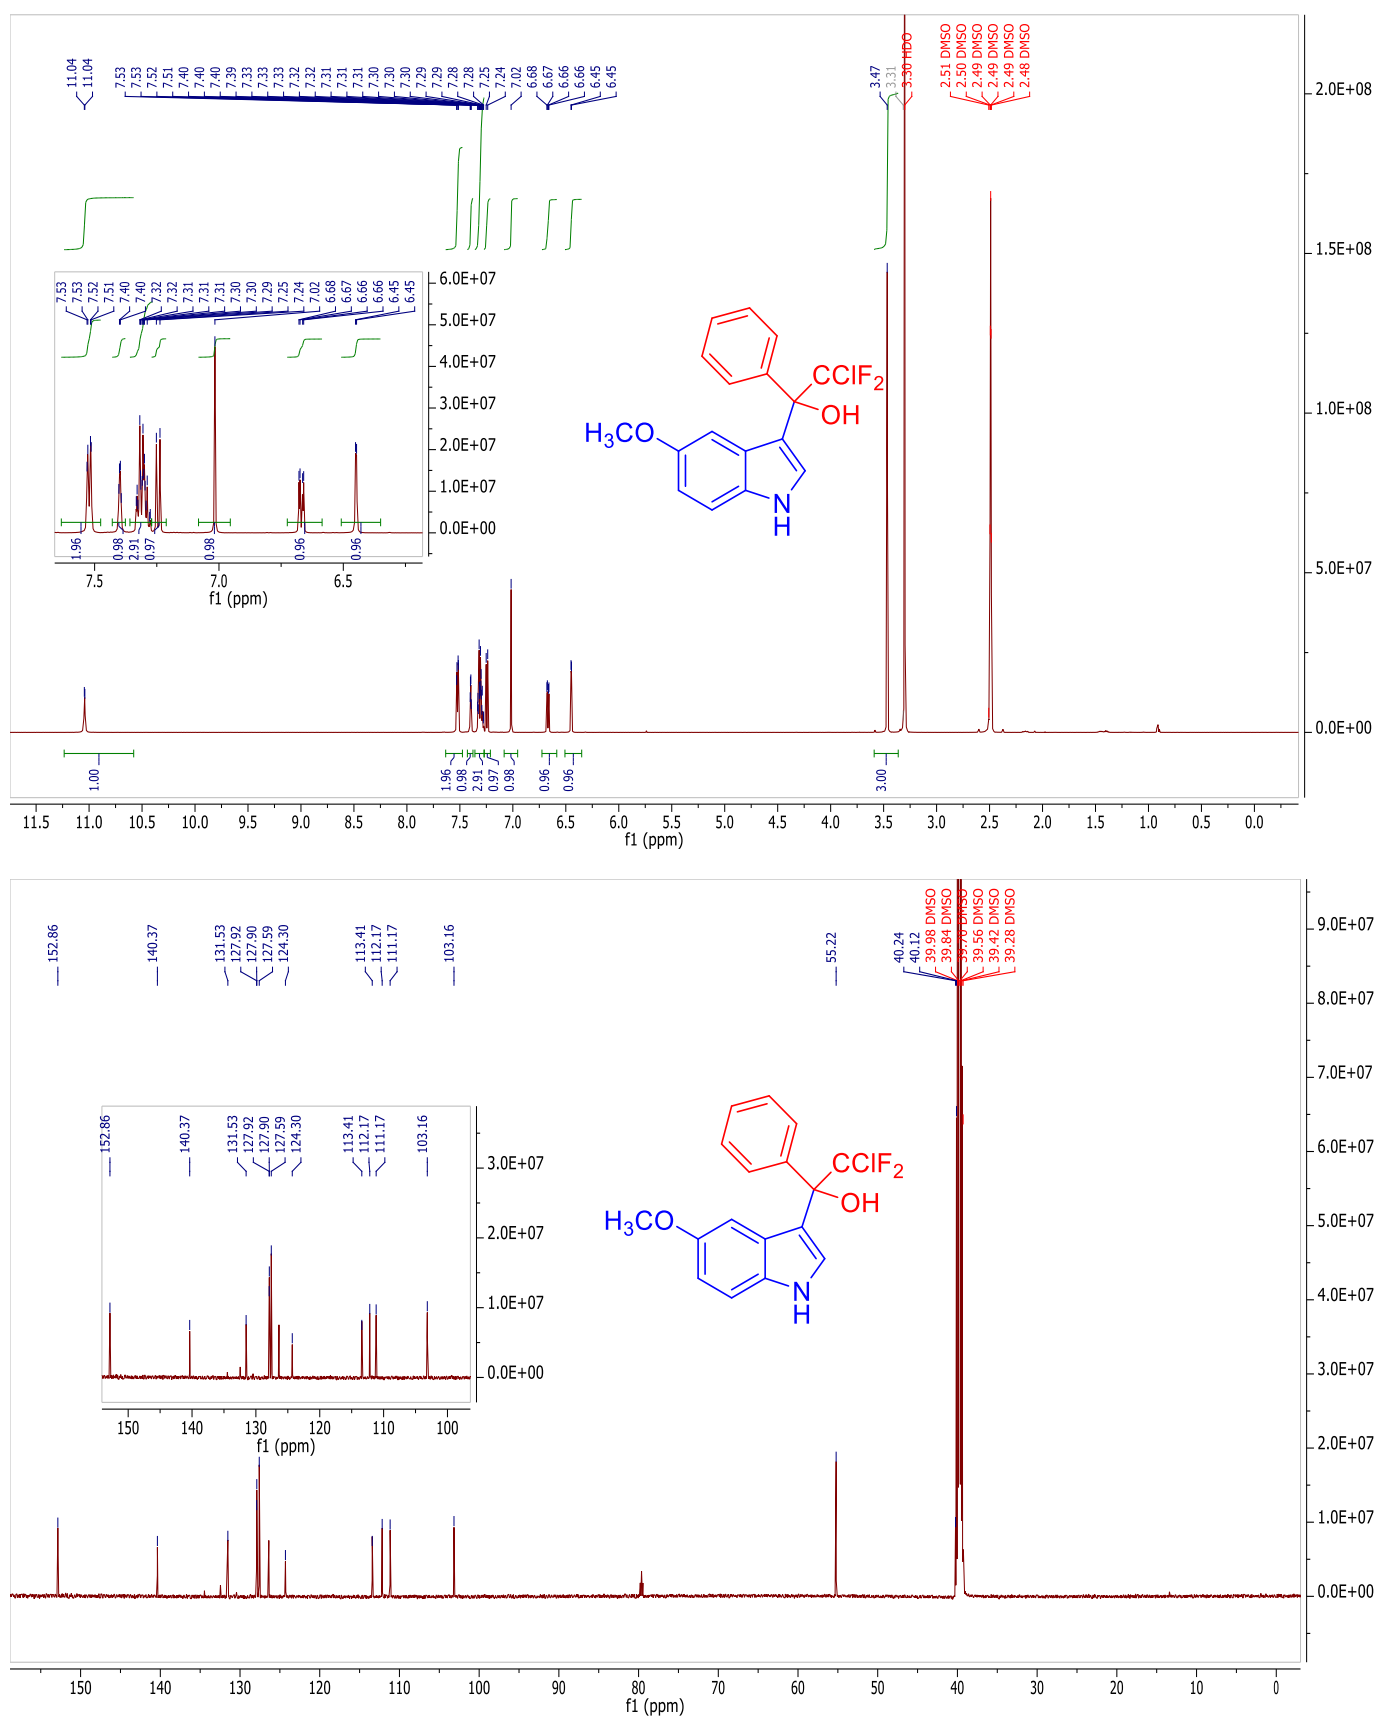

**Figure S11.** <sup>1</sup>H (600 MHz) and <sup>13</sup>C (151 MHz) Spectra of 2-chloro-2,2-difluoro-1-(5-methoxy-1*H*-indol-3-yl)-1-phenylethan-1-ol (**3m**)

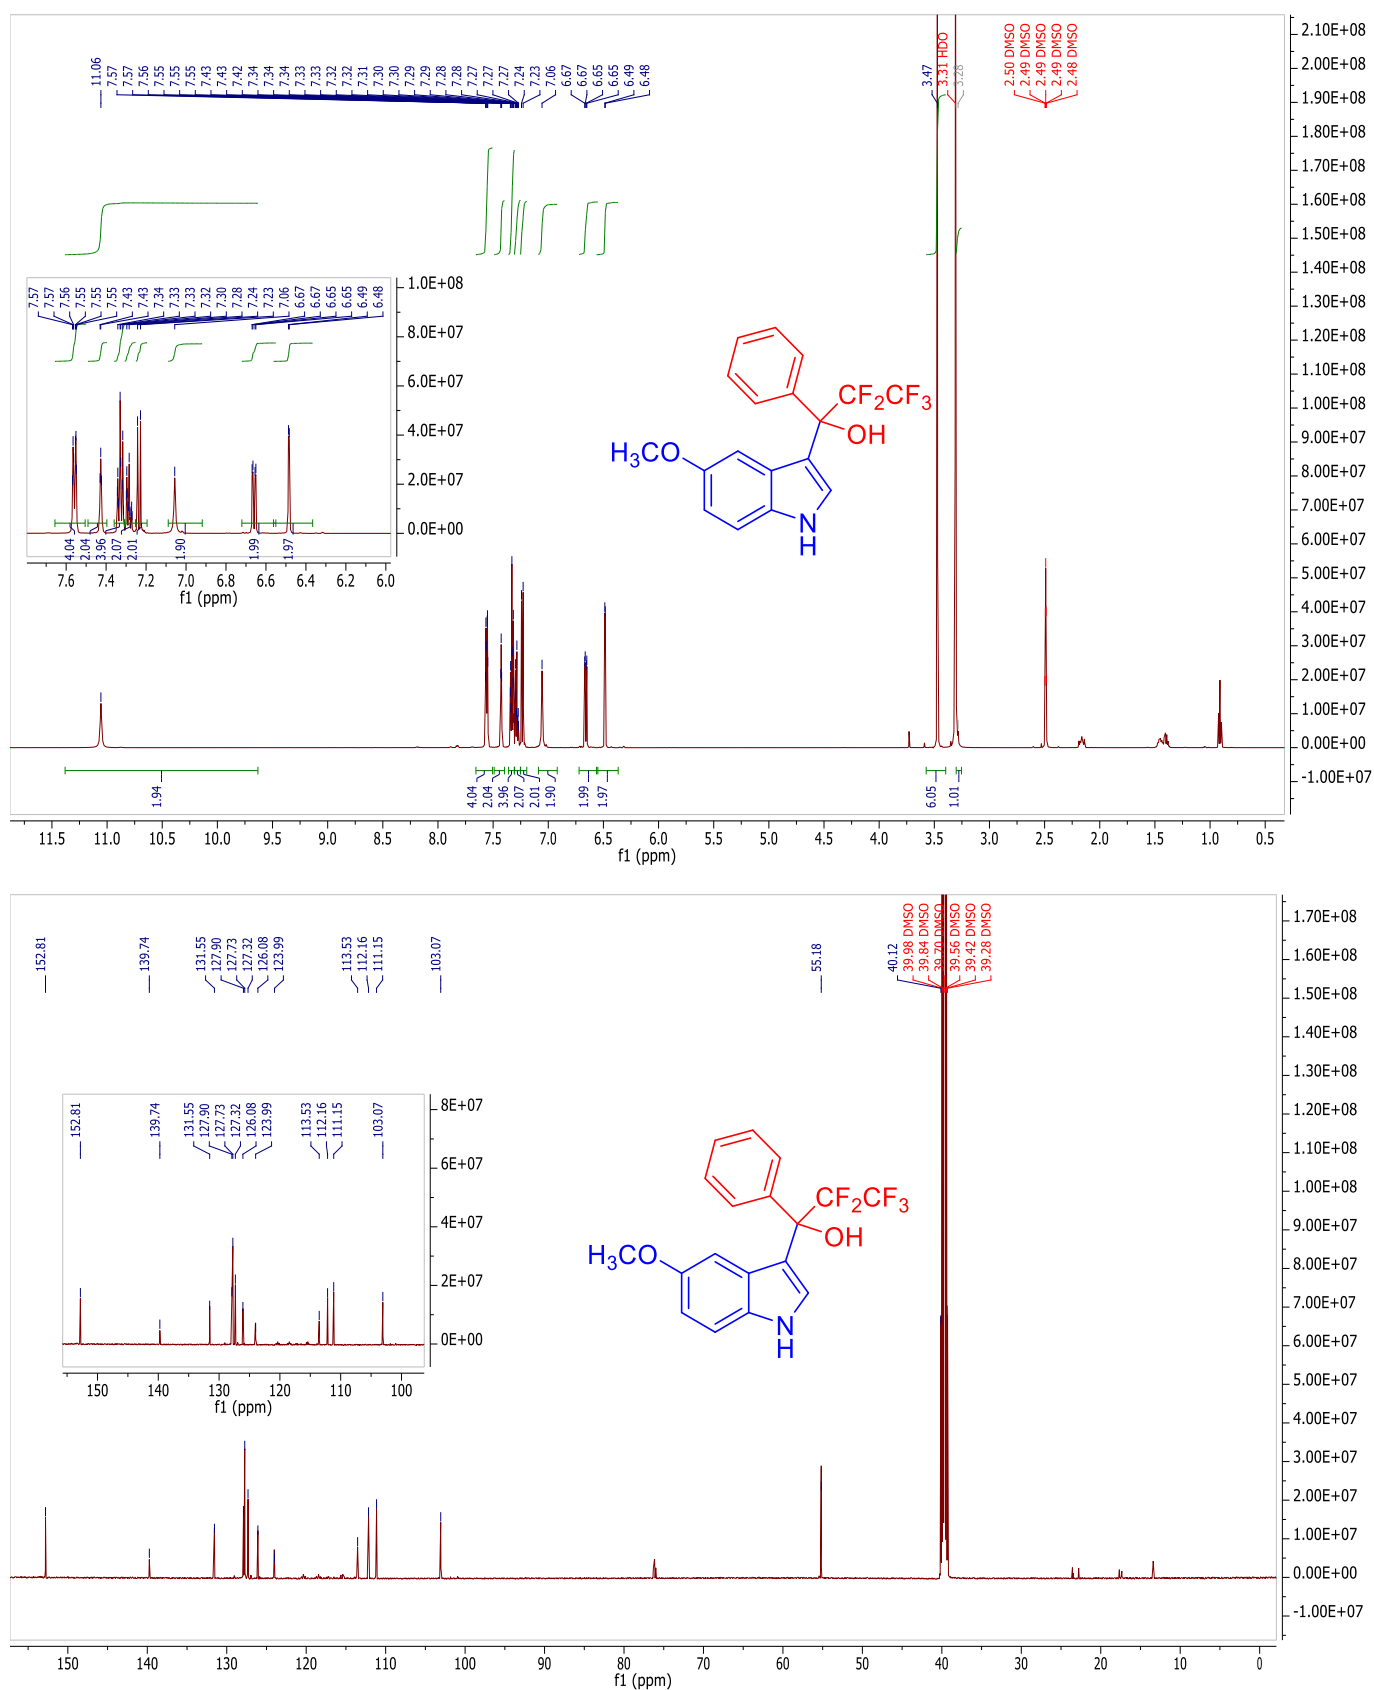

**Figure S12.** <sup>1</sup>H (600 MHz) and <sup>13</sup>C (151 MHz) Spectra of 2,2,3,3,3-pentafluoro-1-(5-methoxy-1*H*-indol-3-yl)-1-phenylpropan-1-ol (**3n**)

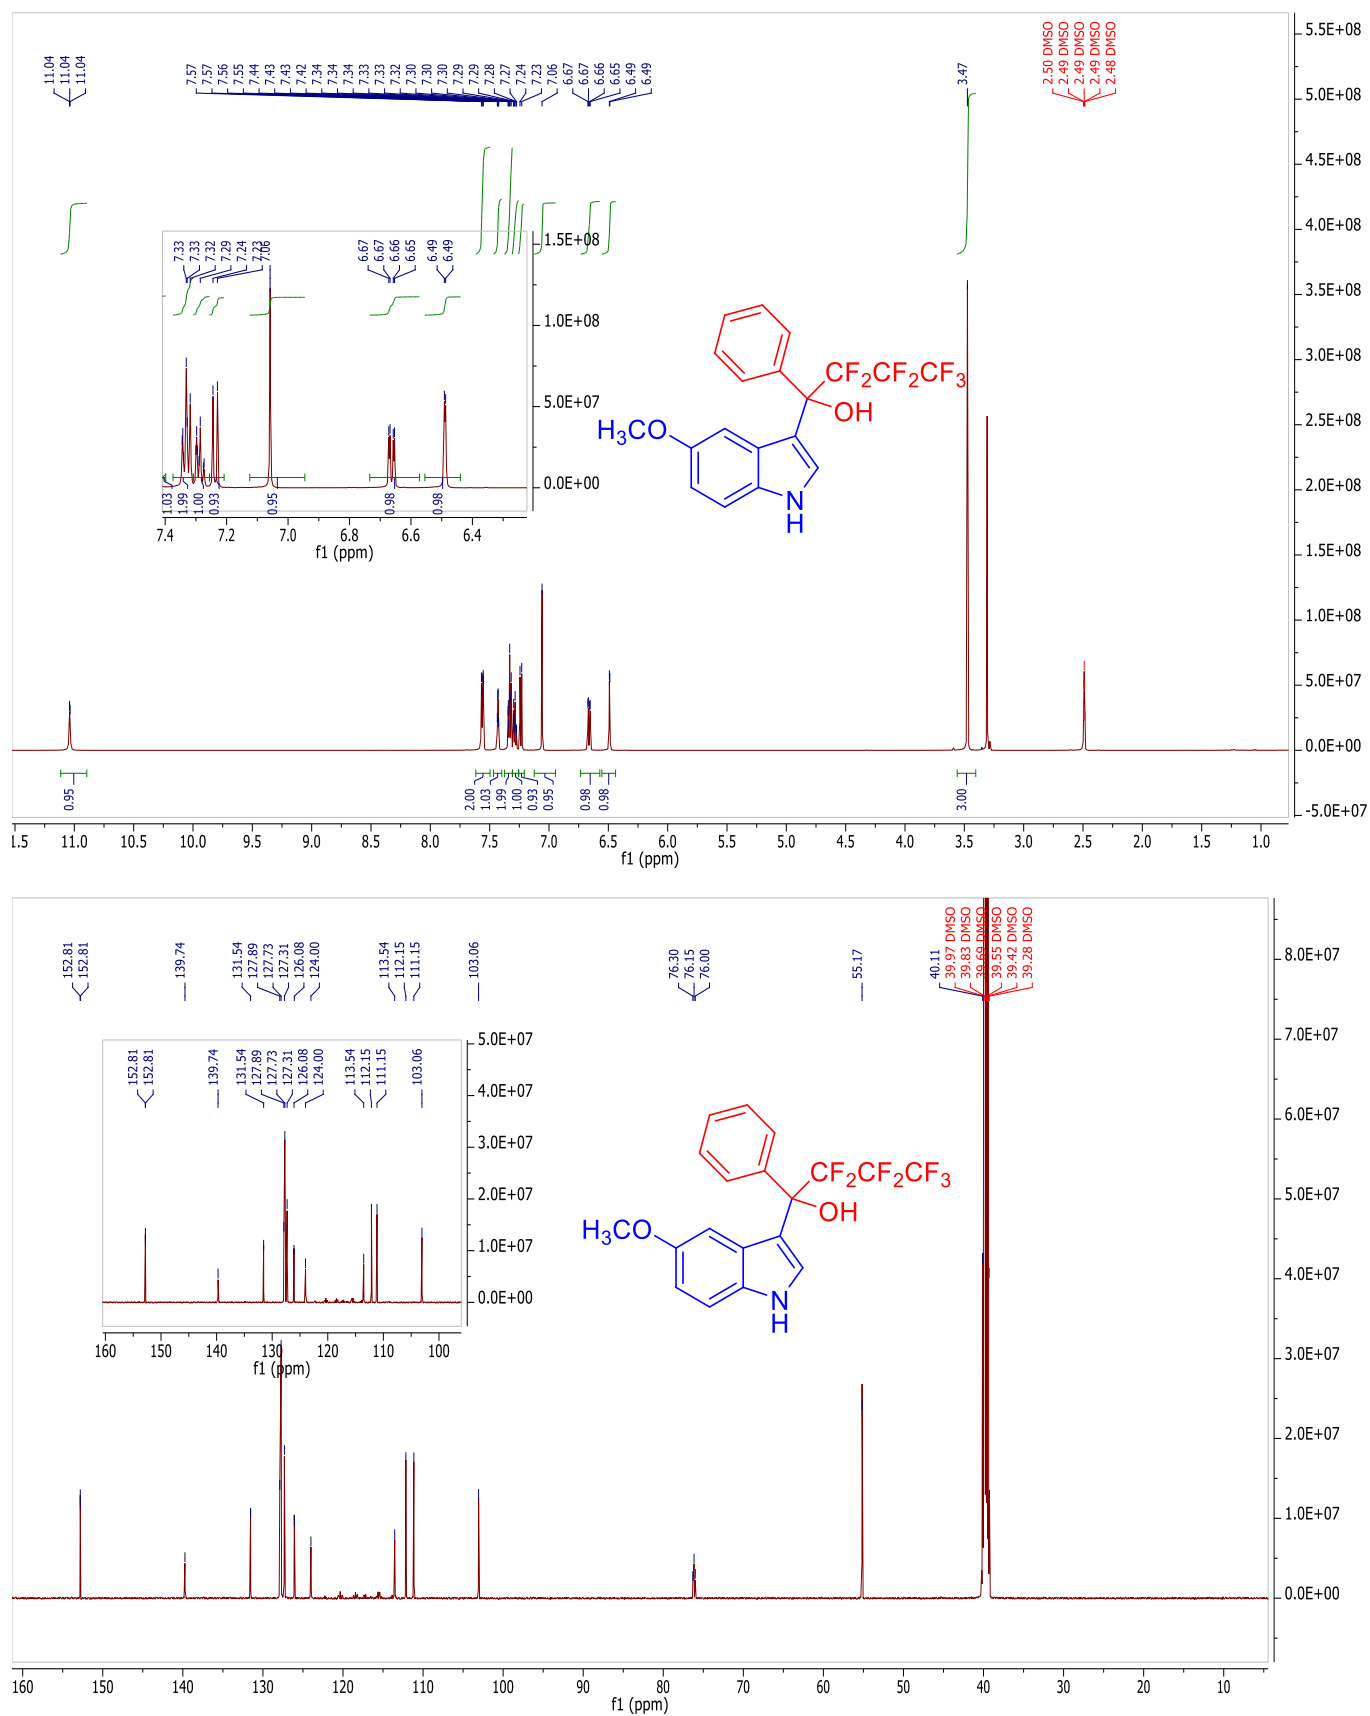

**Figure S13.** <sup>1</sup>H (600 MHz) and <sup>13</sup>C (151 MHz) Spectra of 2,2,3,3,4,4,4-heptafluoro-1-(5-methoxy-1*H*-indol-3-yl)-1-phenylbutan-1-ol (**3o**)

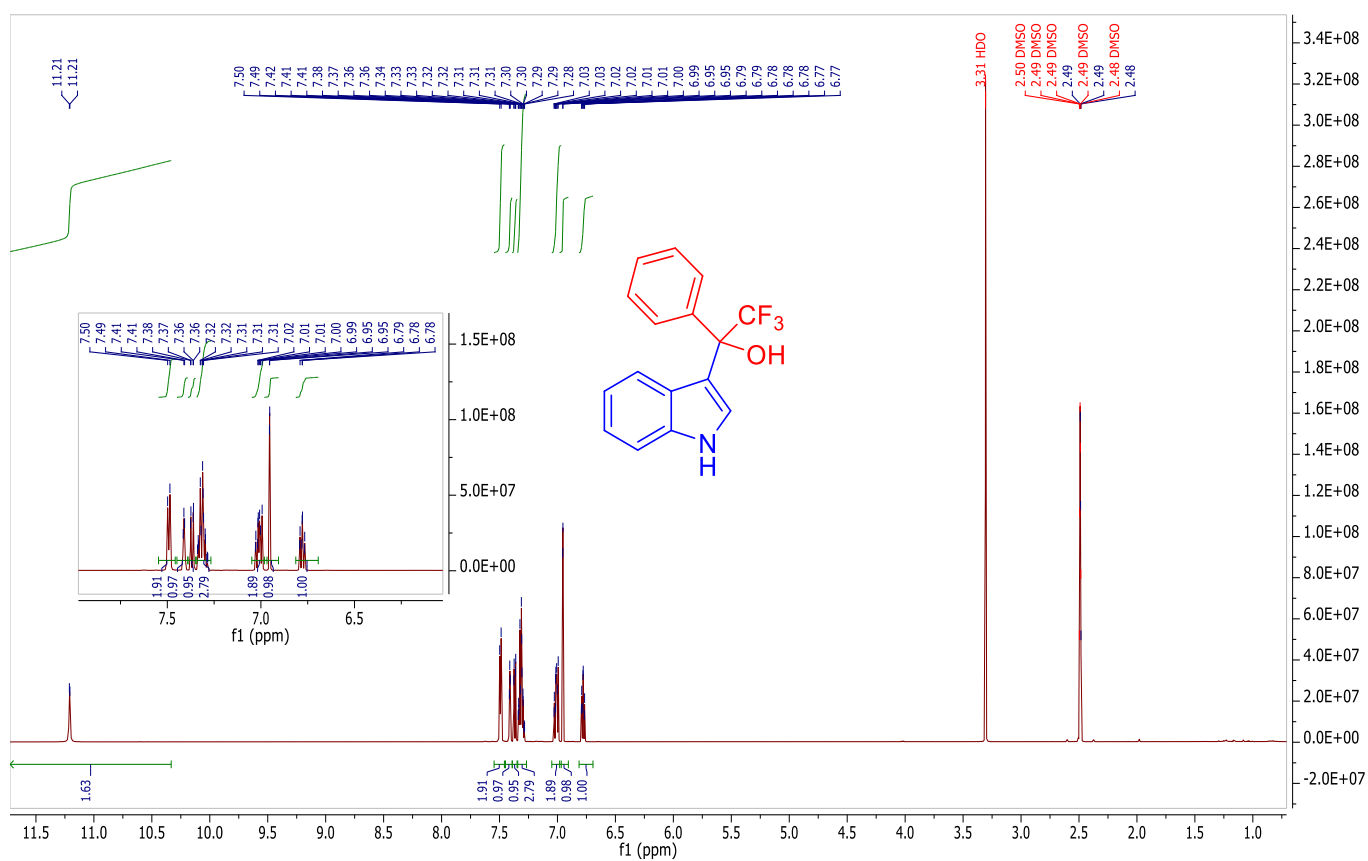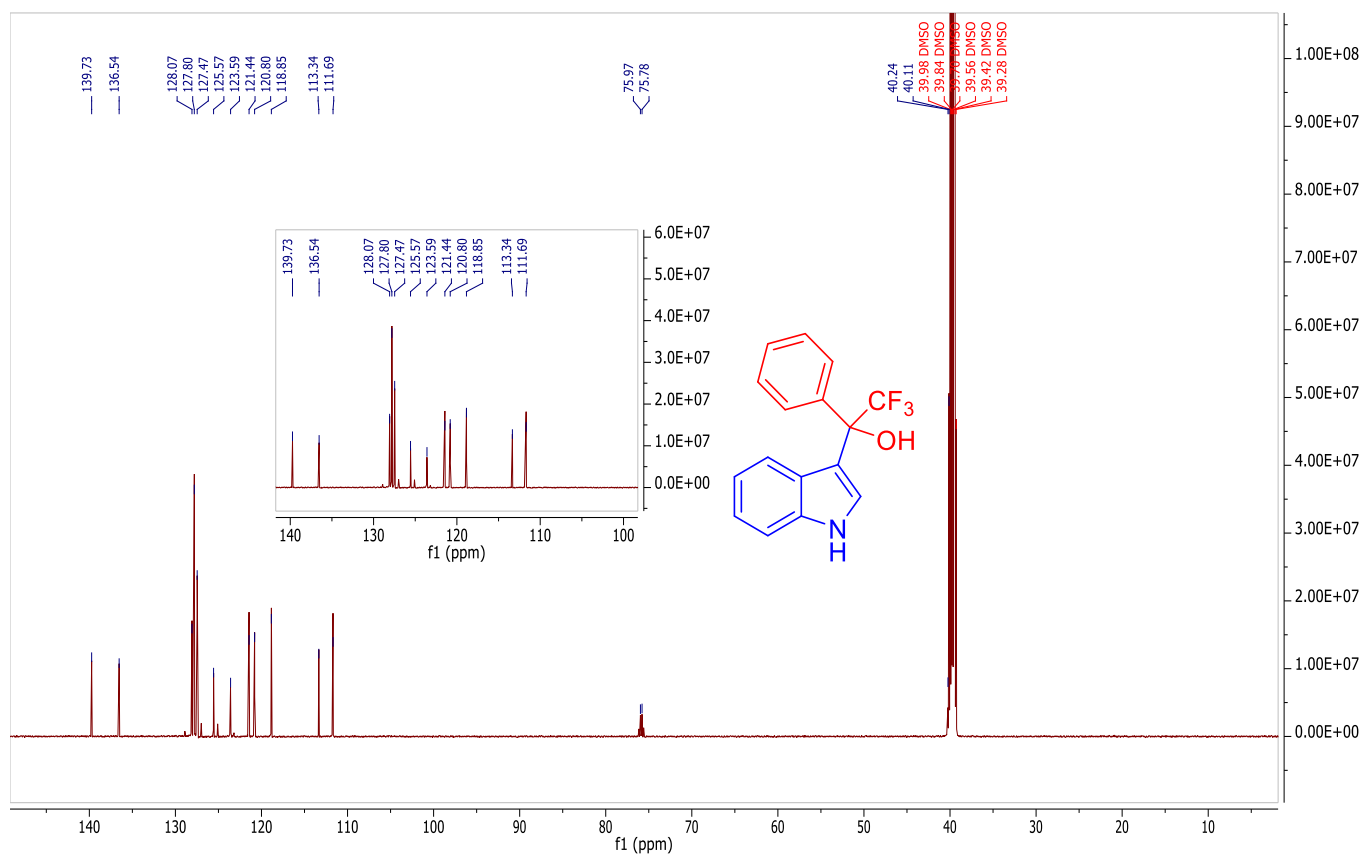

**Figure S14.**  $^1\text{H}$  (600 MHz) and  $^{13}\text{C}$  (151 MHz) Spectra of 2,2,2-trifluoro-1-(1*H*-indol-3-yl)-1-phenylethan-1-ol (**3p**)

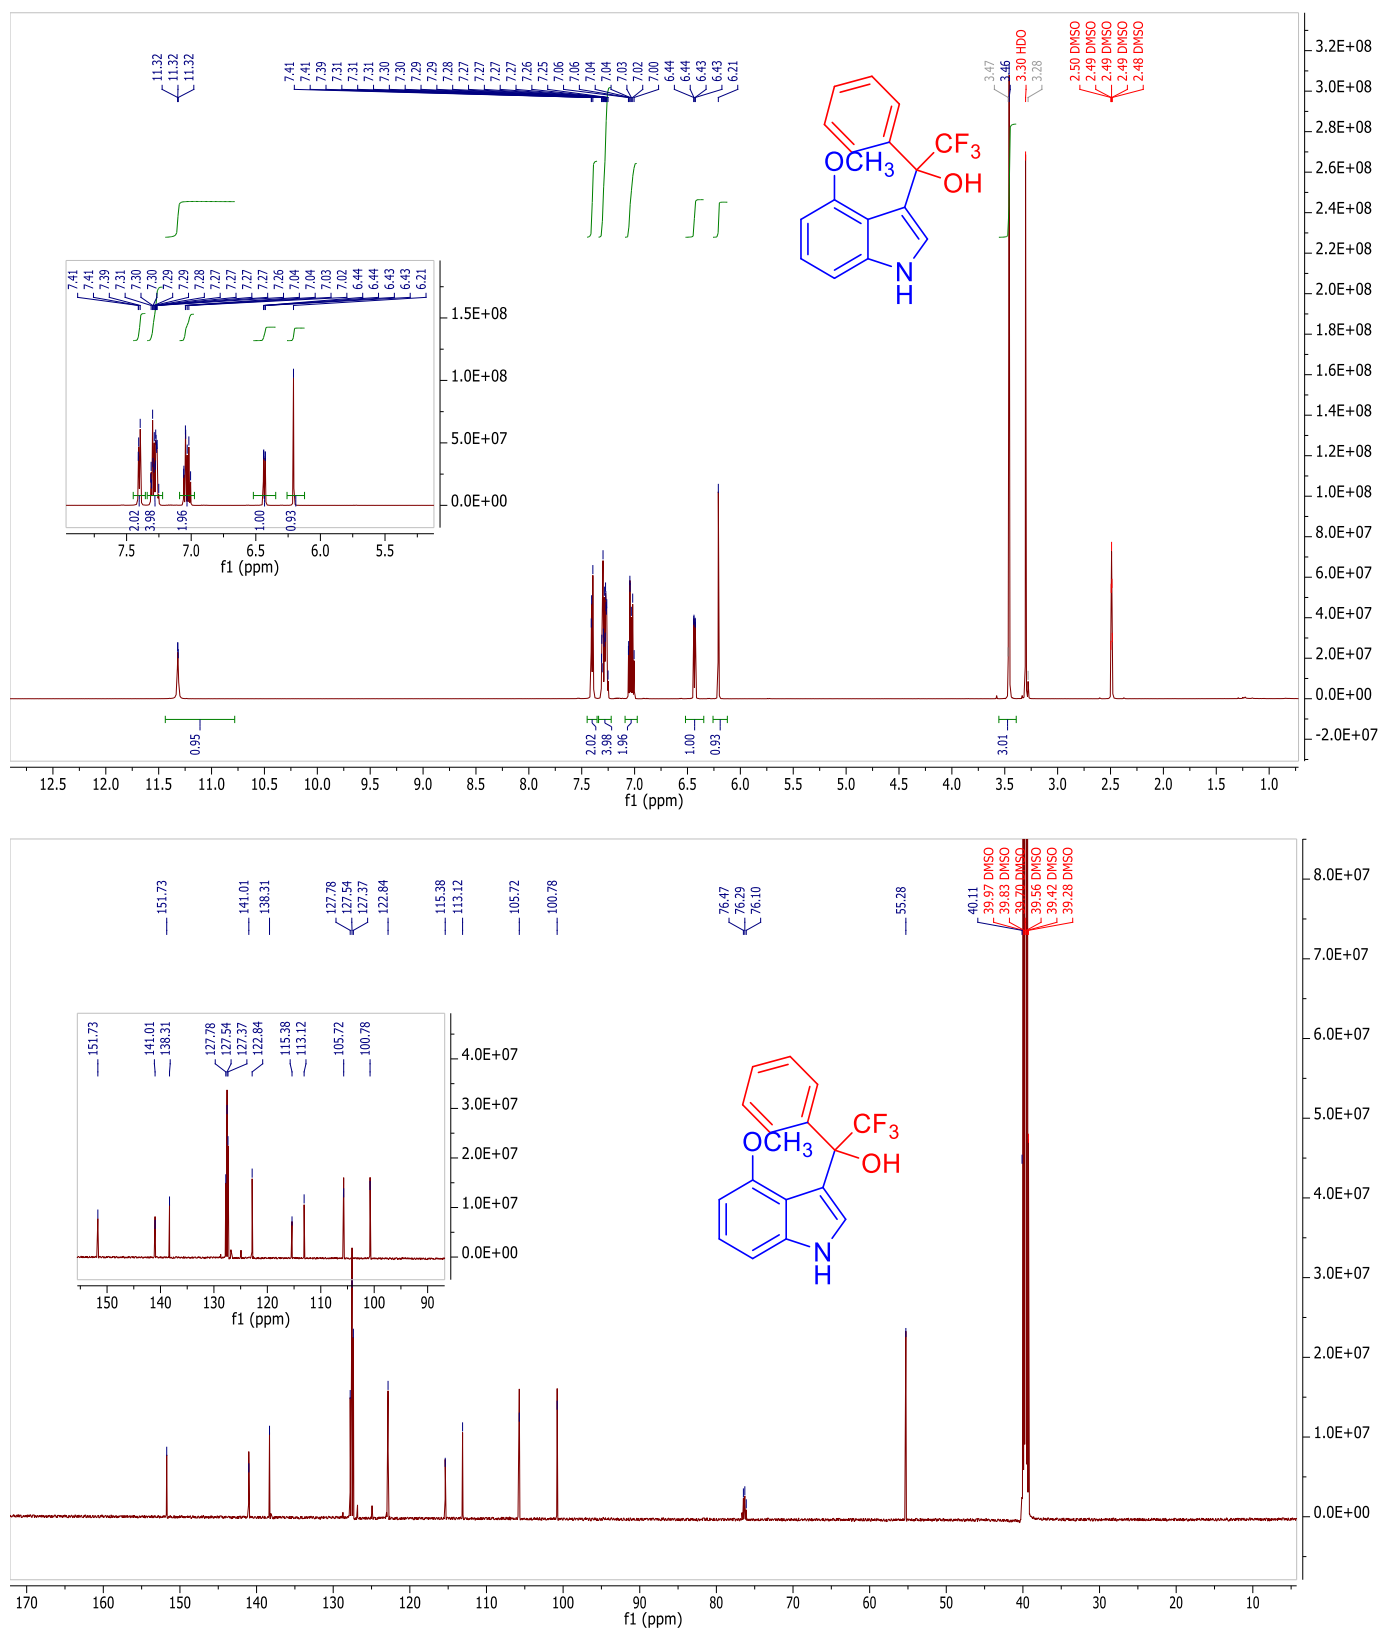

**Figure S15.** <sup>1</sup>H (600 MHz) and <sup>13</sup>C (151 MHz) Spectra of 2,2,2-trifluoro-1-(4-methoxy-1H-indol-3-yl)-1-phenylethan-1-ol (**3q**)

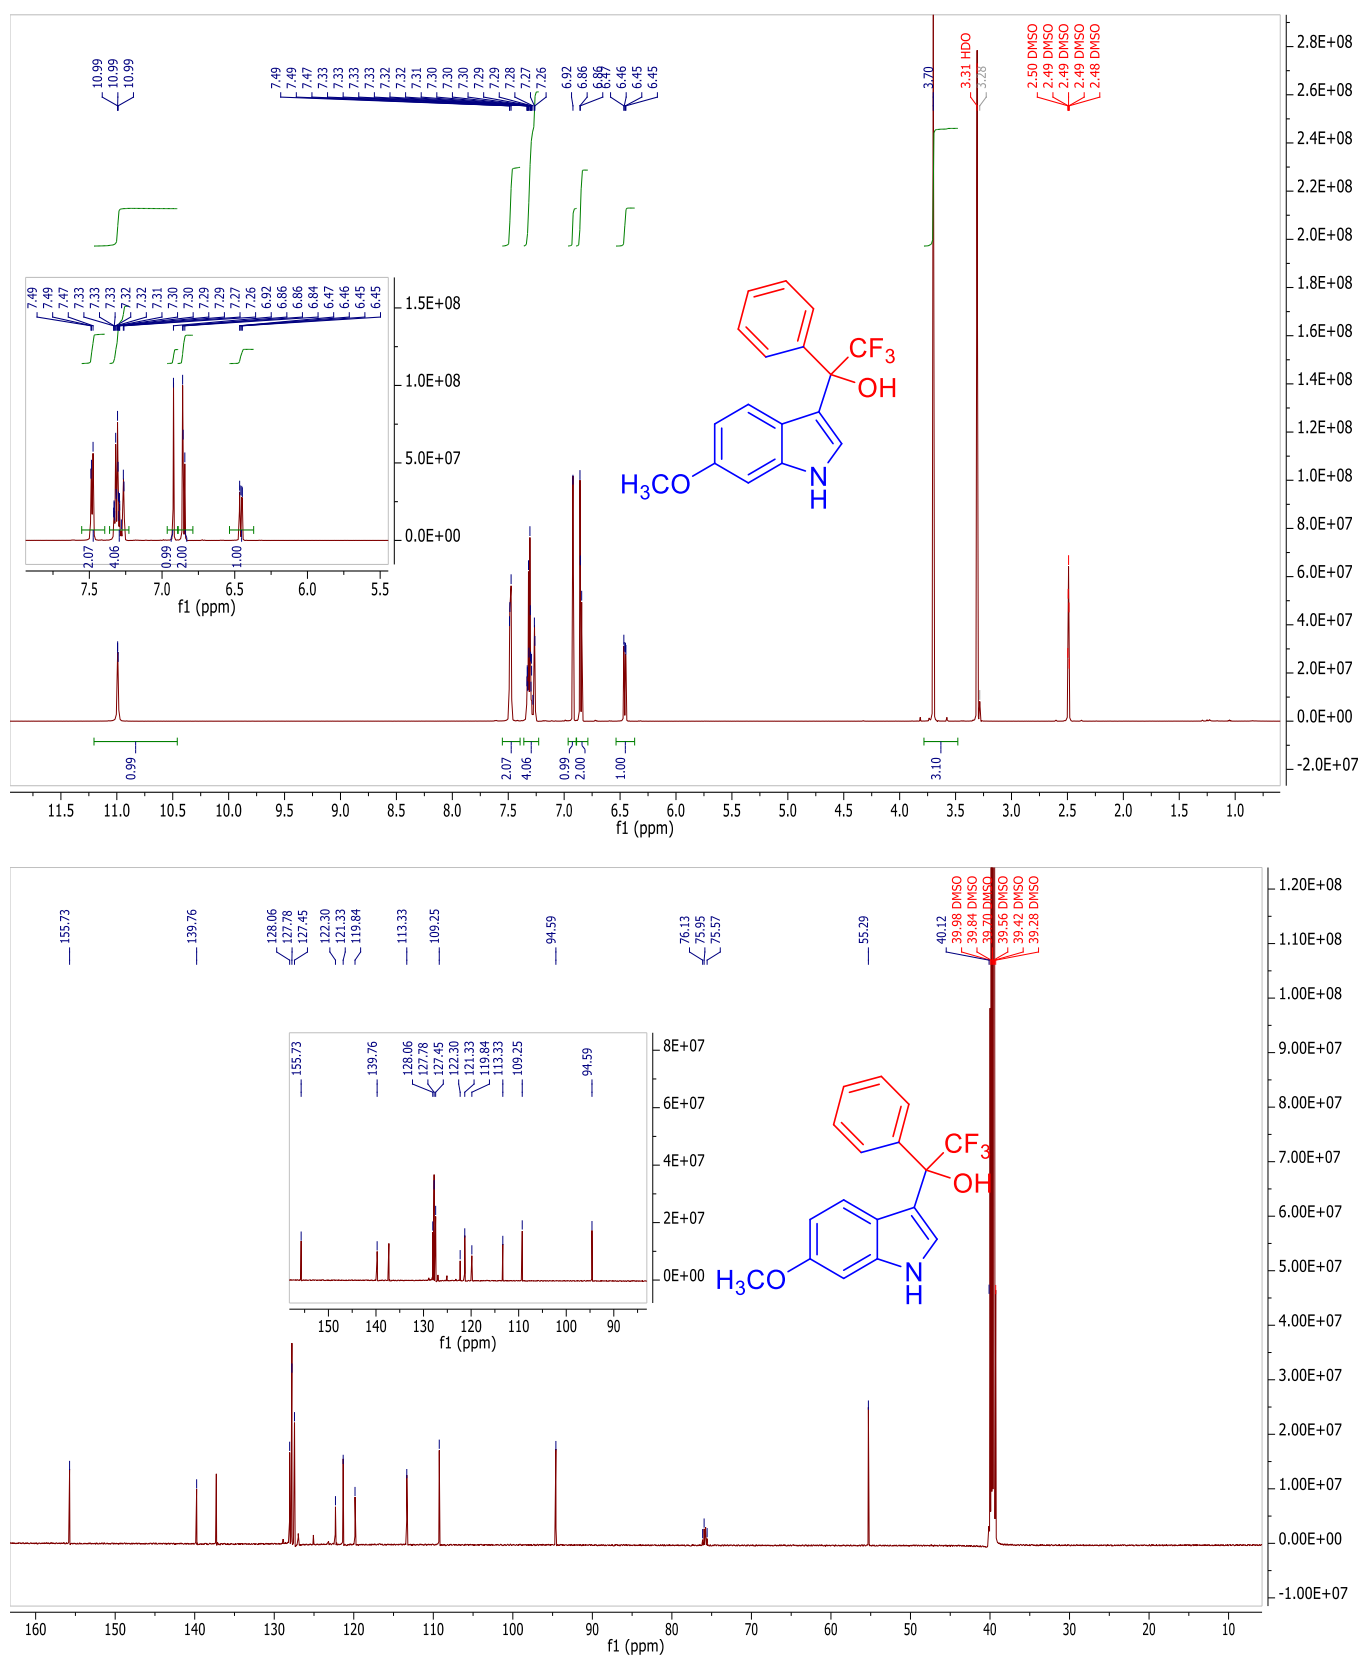

**Figure S16.** <sup>1</sup>H (600 MHz) and <sup>13</sup>C (151 MHz) Spectra of 2,2,2-trifluoro-1-(6-methoxy-1*H*-indol-3-yl)-1-phenylethan-1-ol (**3r**)

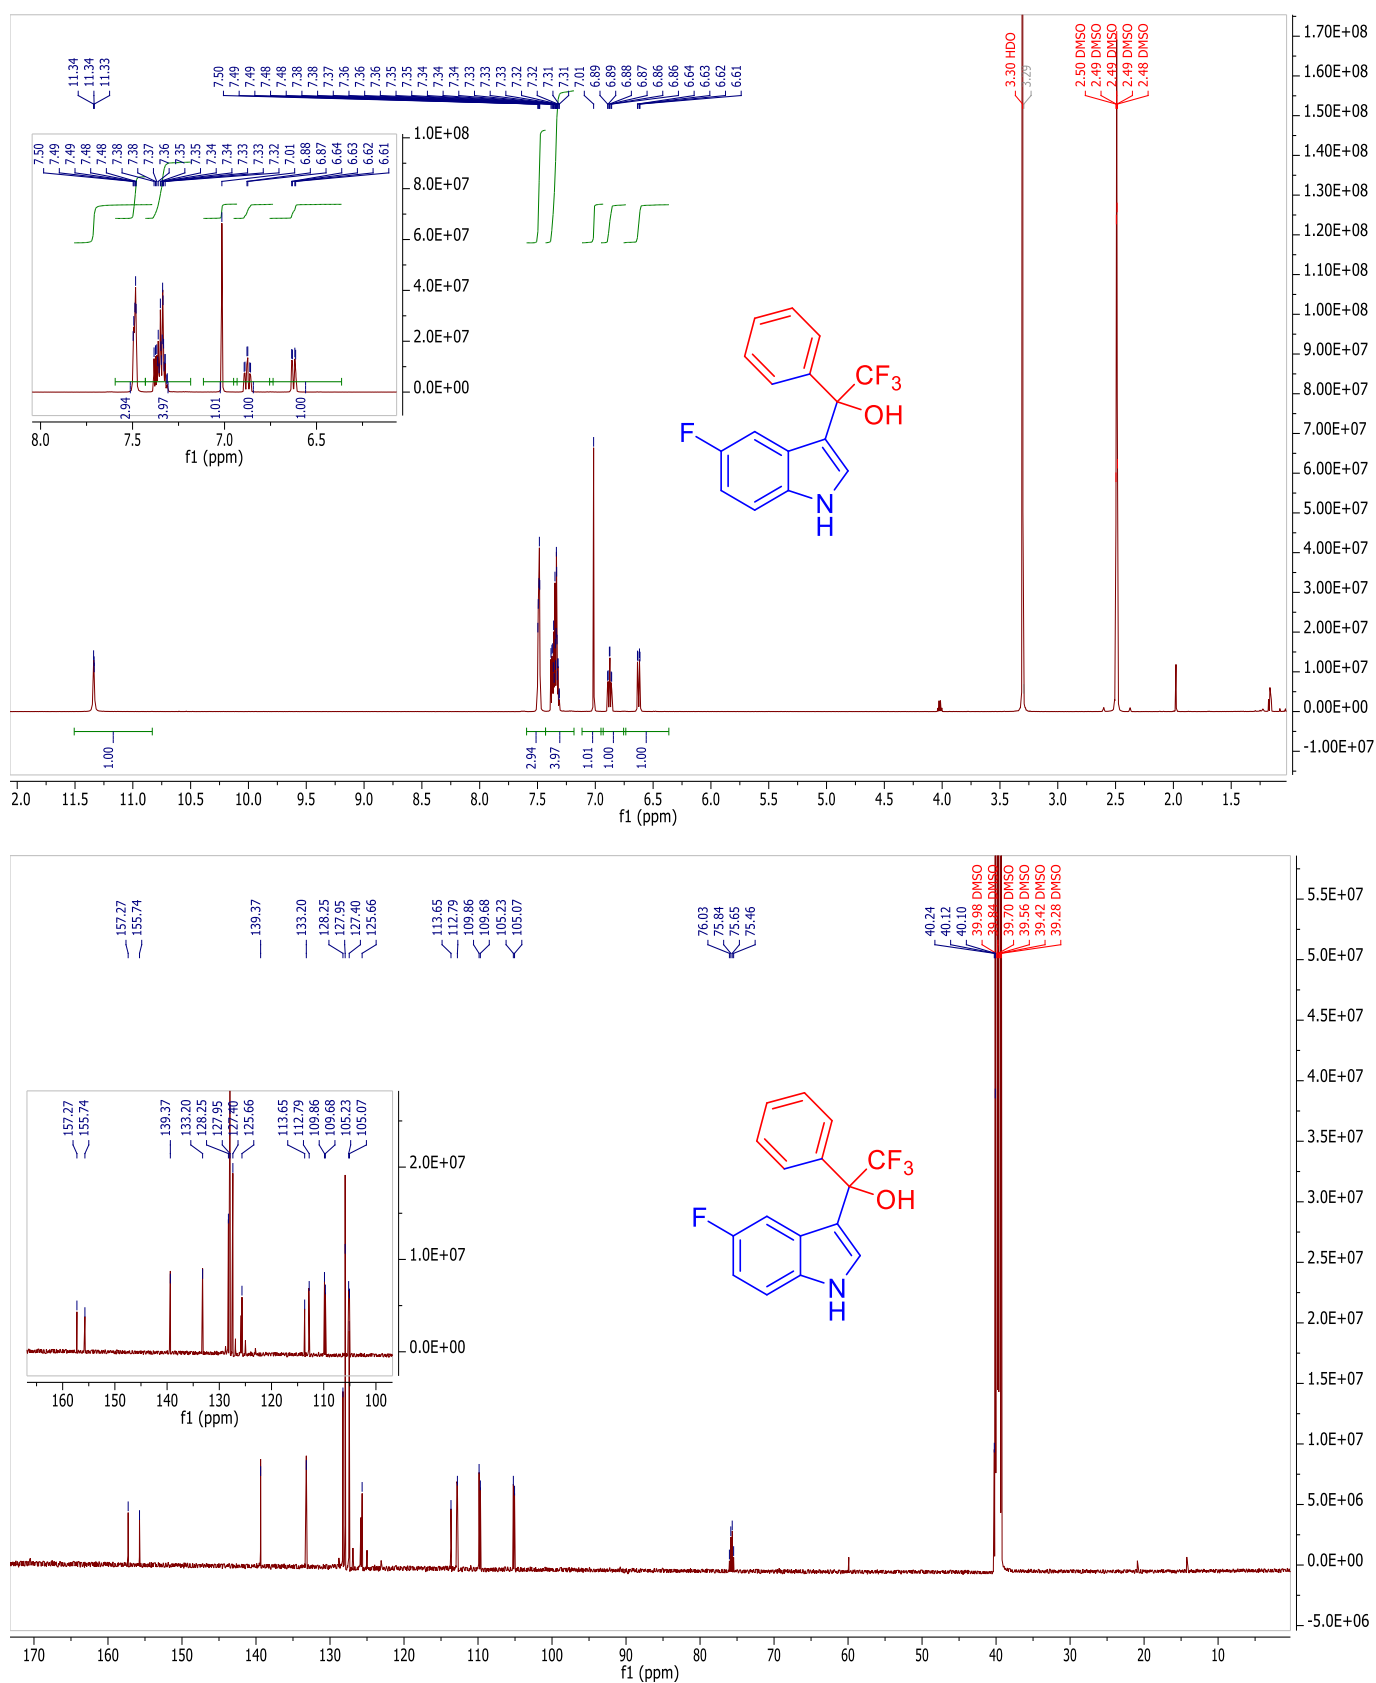

**Figure S17.** <sup>1</sup>H (600 MHz) and <sup>13</sup>C (151 MHz) Spectra of 2,2,2-trifluoro-1-(5-fluoro-1*H*-indol-3-yl)-1-phenylethan-1-ol (**3s**)

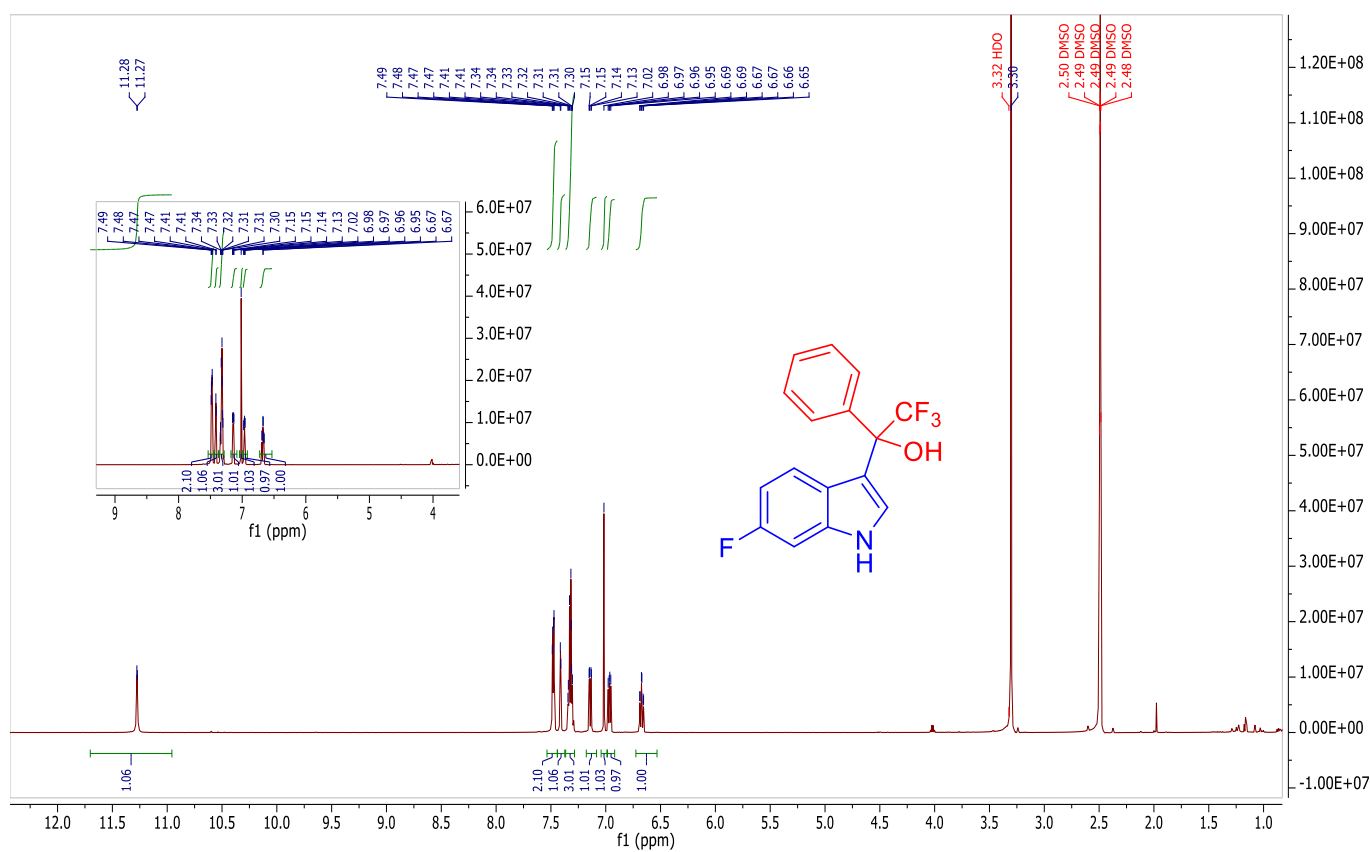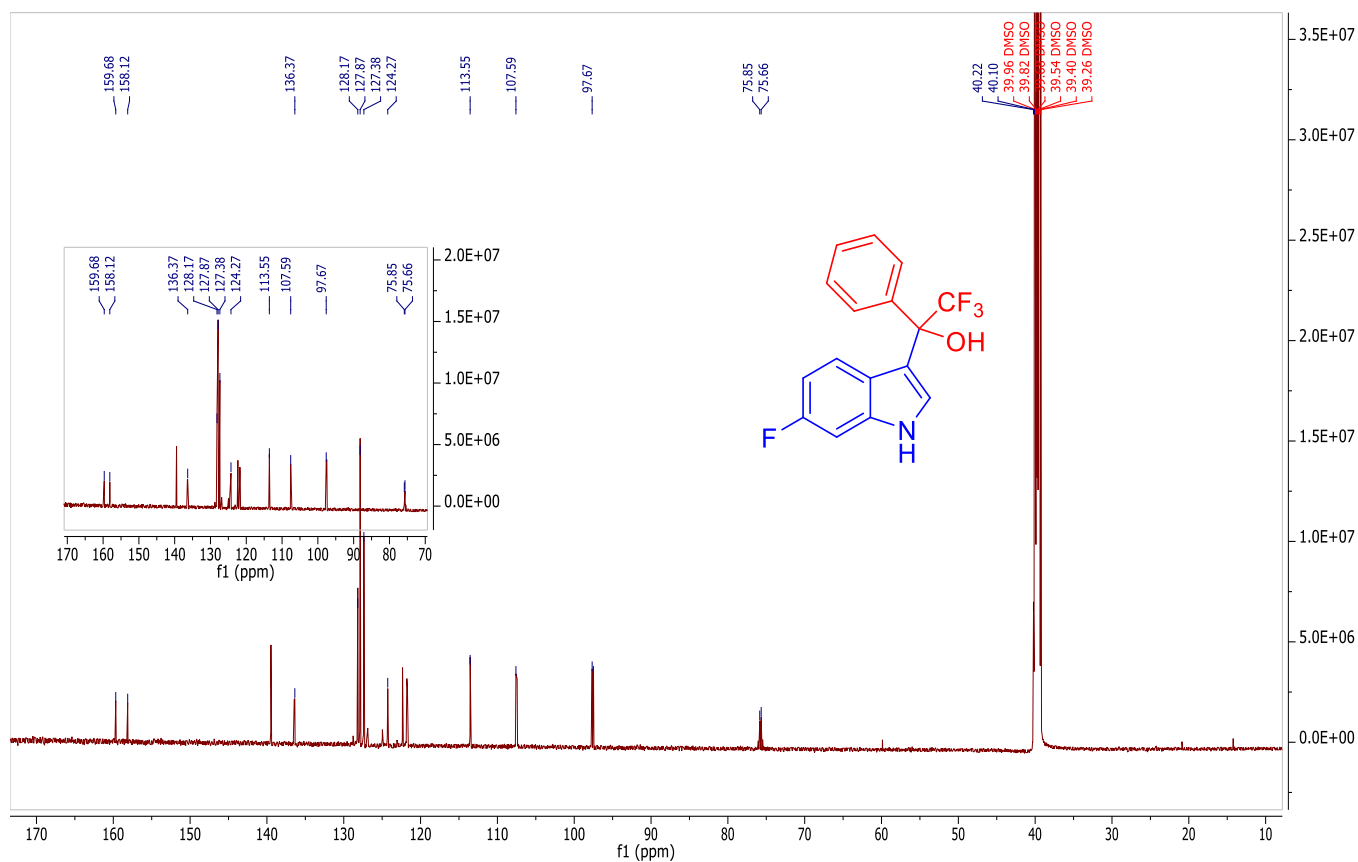

**Figure S18.** <sup>1</sup>H (600 MHz) and <sup>13</sup>C (151 MHz) Spectra of 2,2,2-trifluoro-1-(6-fluoro-1H-indol-3-yl)-1-phenylethan-1-ol (**3t**)





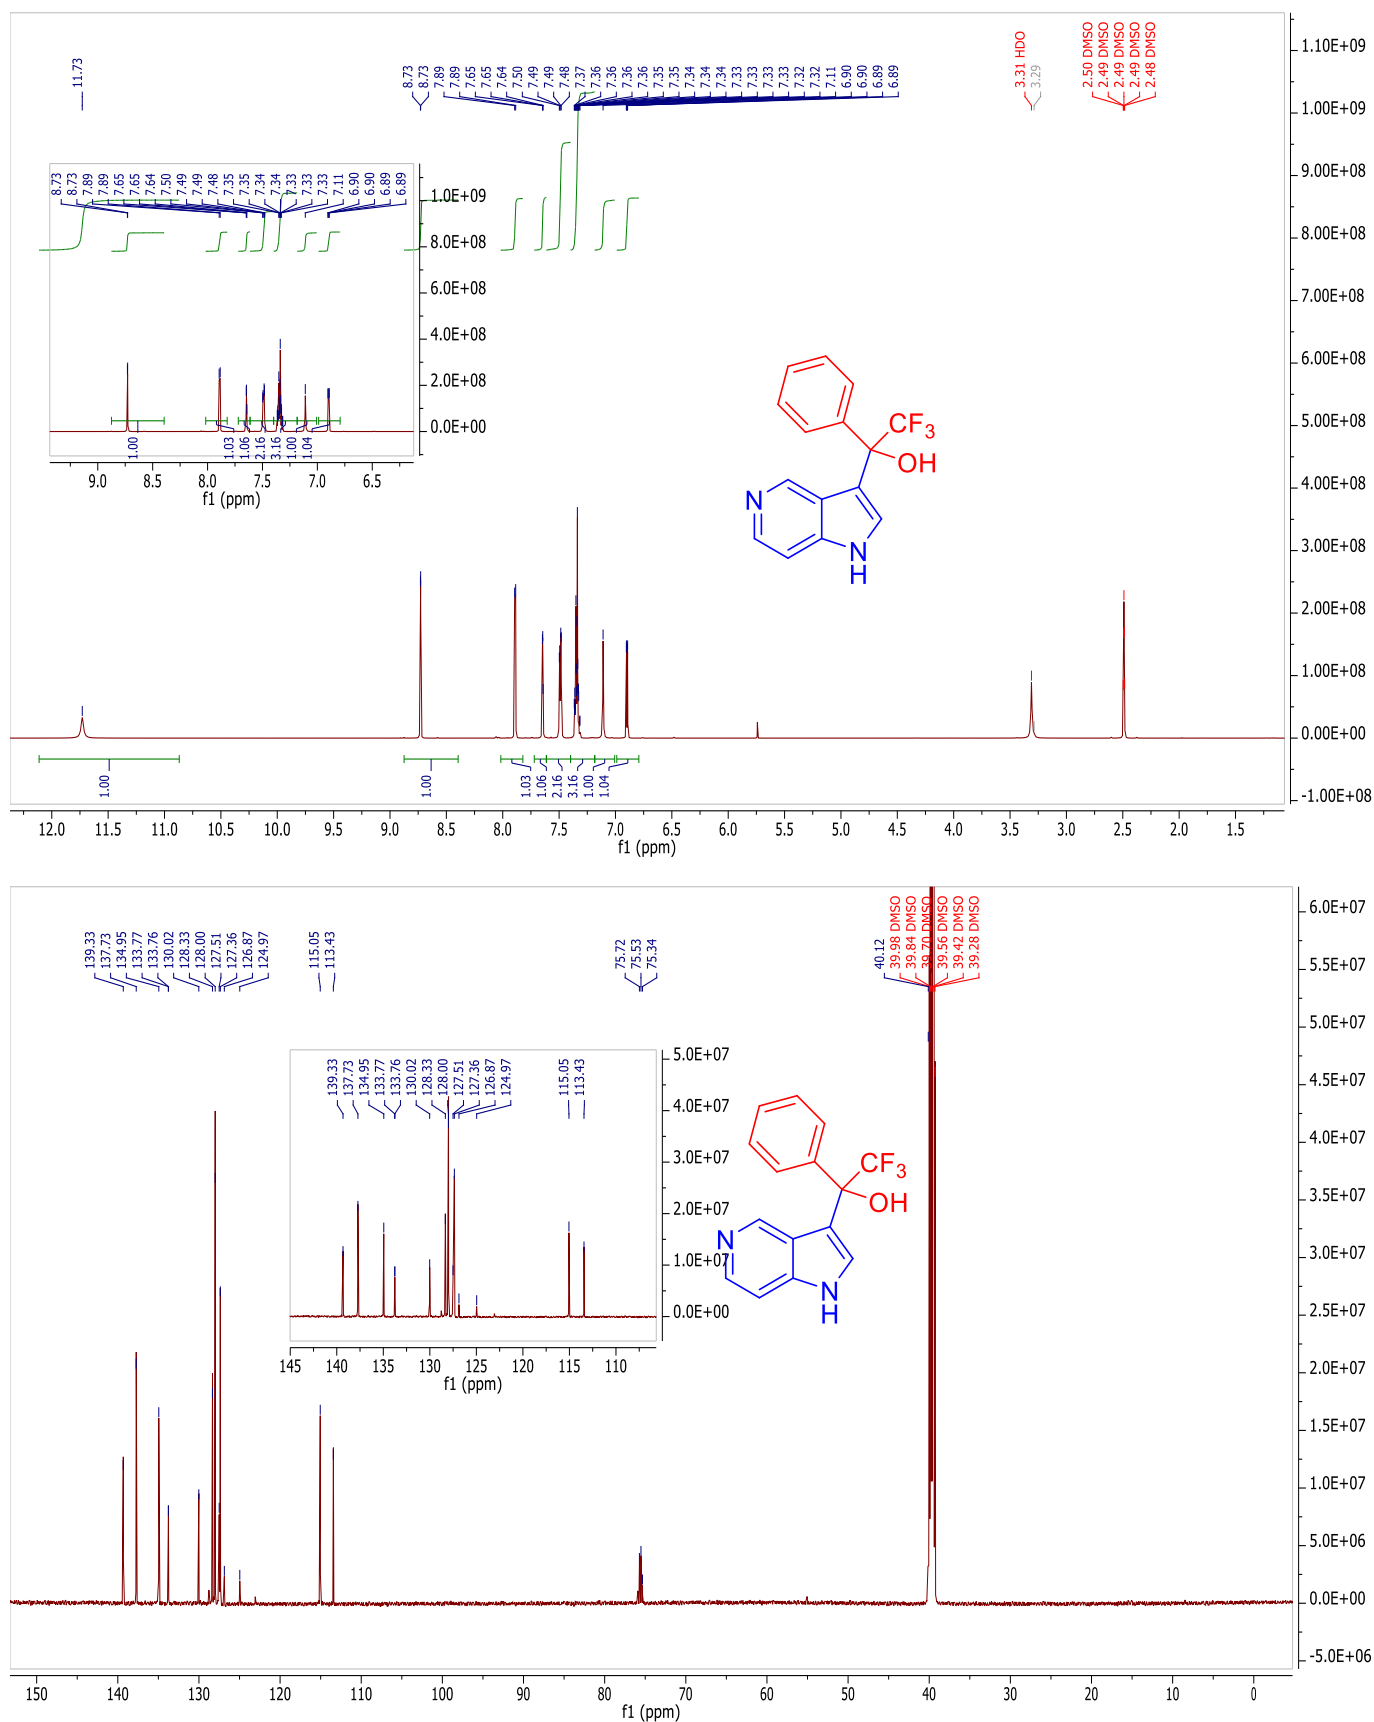

**Figure S20.** <sup>1</sup>H (600 MHz) and <sup>13</sup>C (151 MHz) Spectra of 2,2,2-Trifluoro-1-phenyl-1-(1*H*-pyrrolo[3,2-*c*]pyridin-3-yl)ethan-1-ol (**3v**)

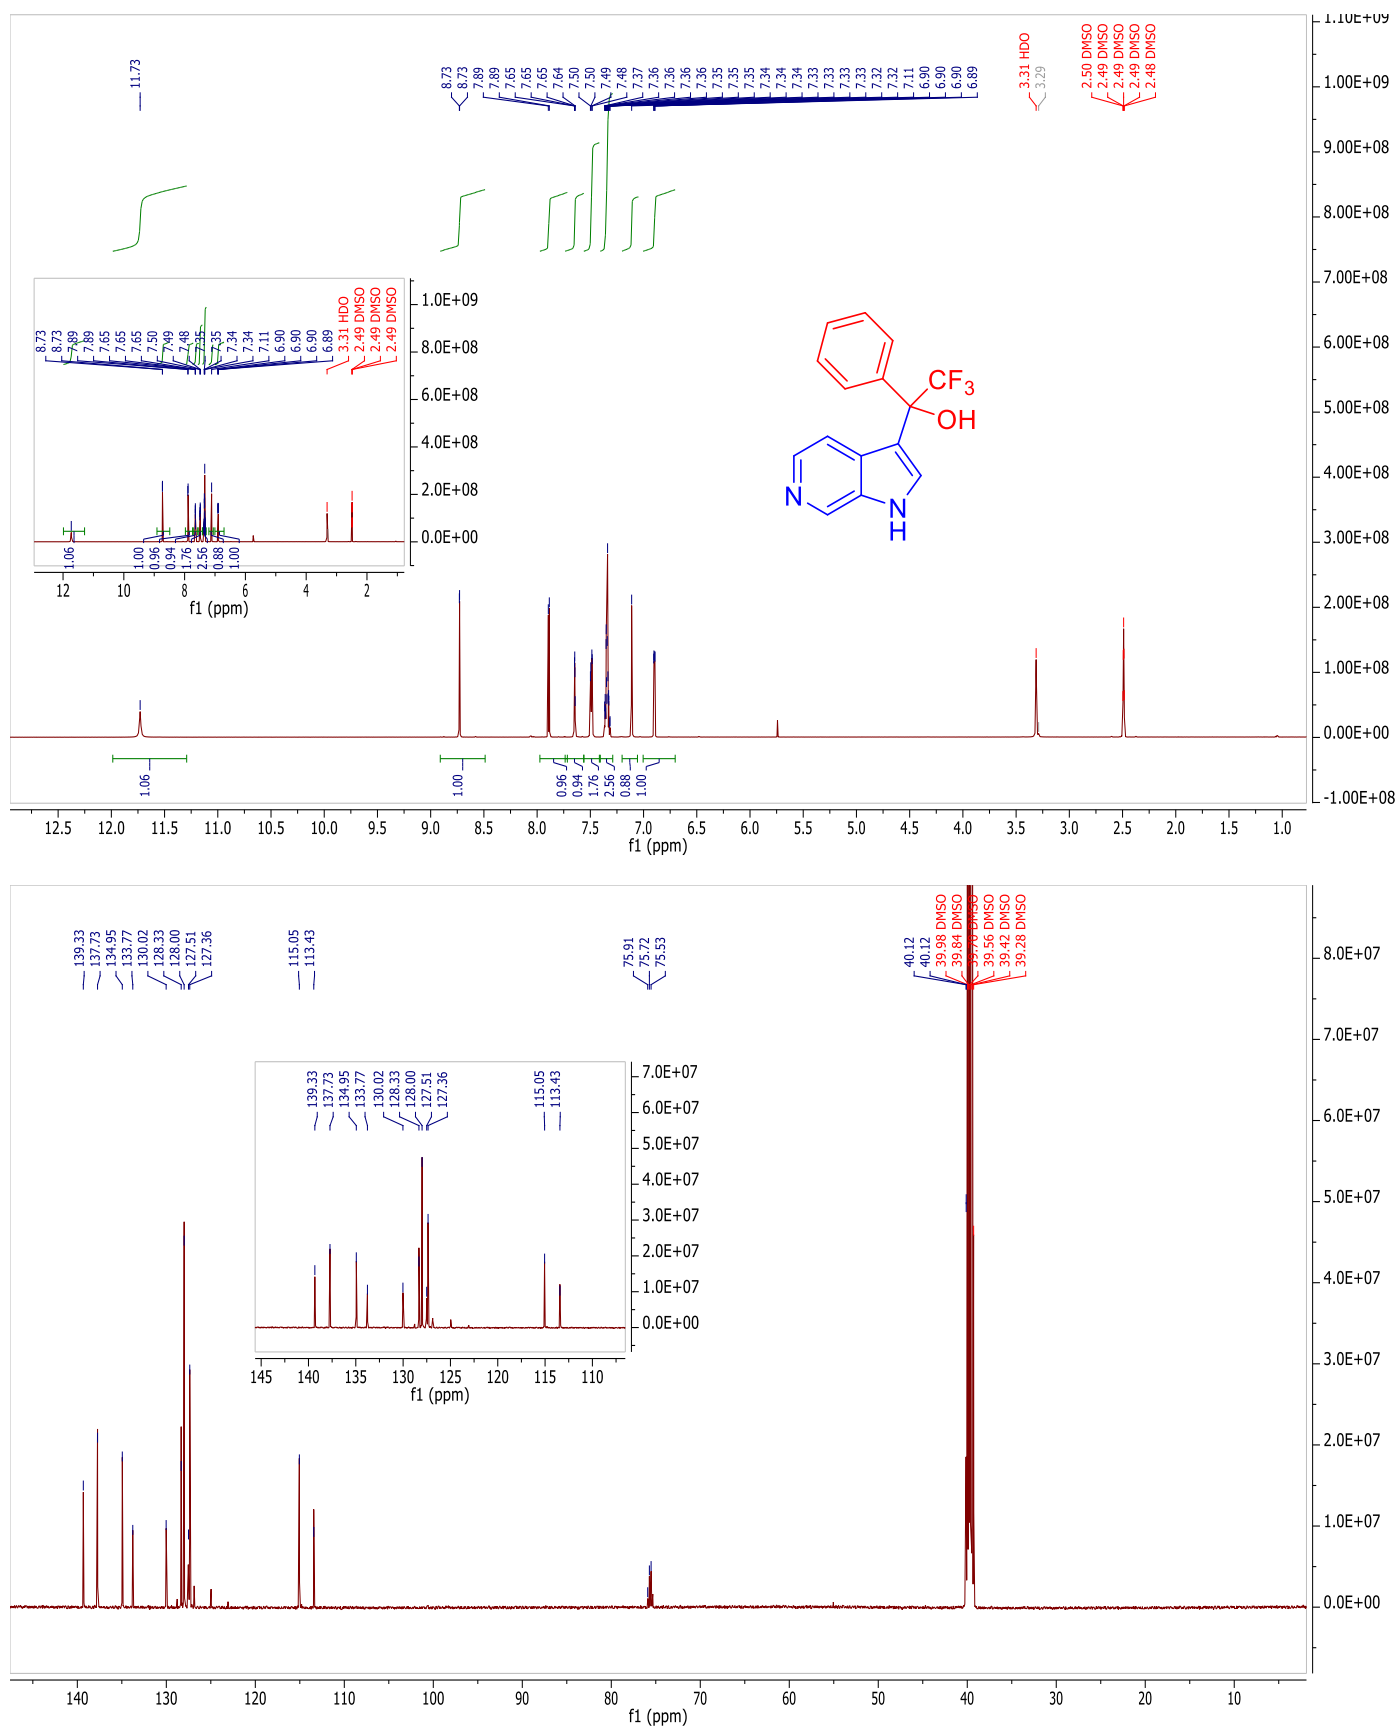

**Figure S21.** <sup>1</sup>H (600 MHz) and <sup>13</sup>C (151 MHz) Spectra of 2,2,2-trifluoro-1-phenyl-1-(1H-pyrrolo[2,3-c]pyridin-3-yl)ethan-1-ol (**3w**)

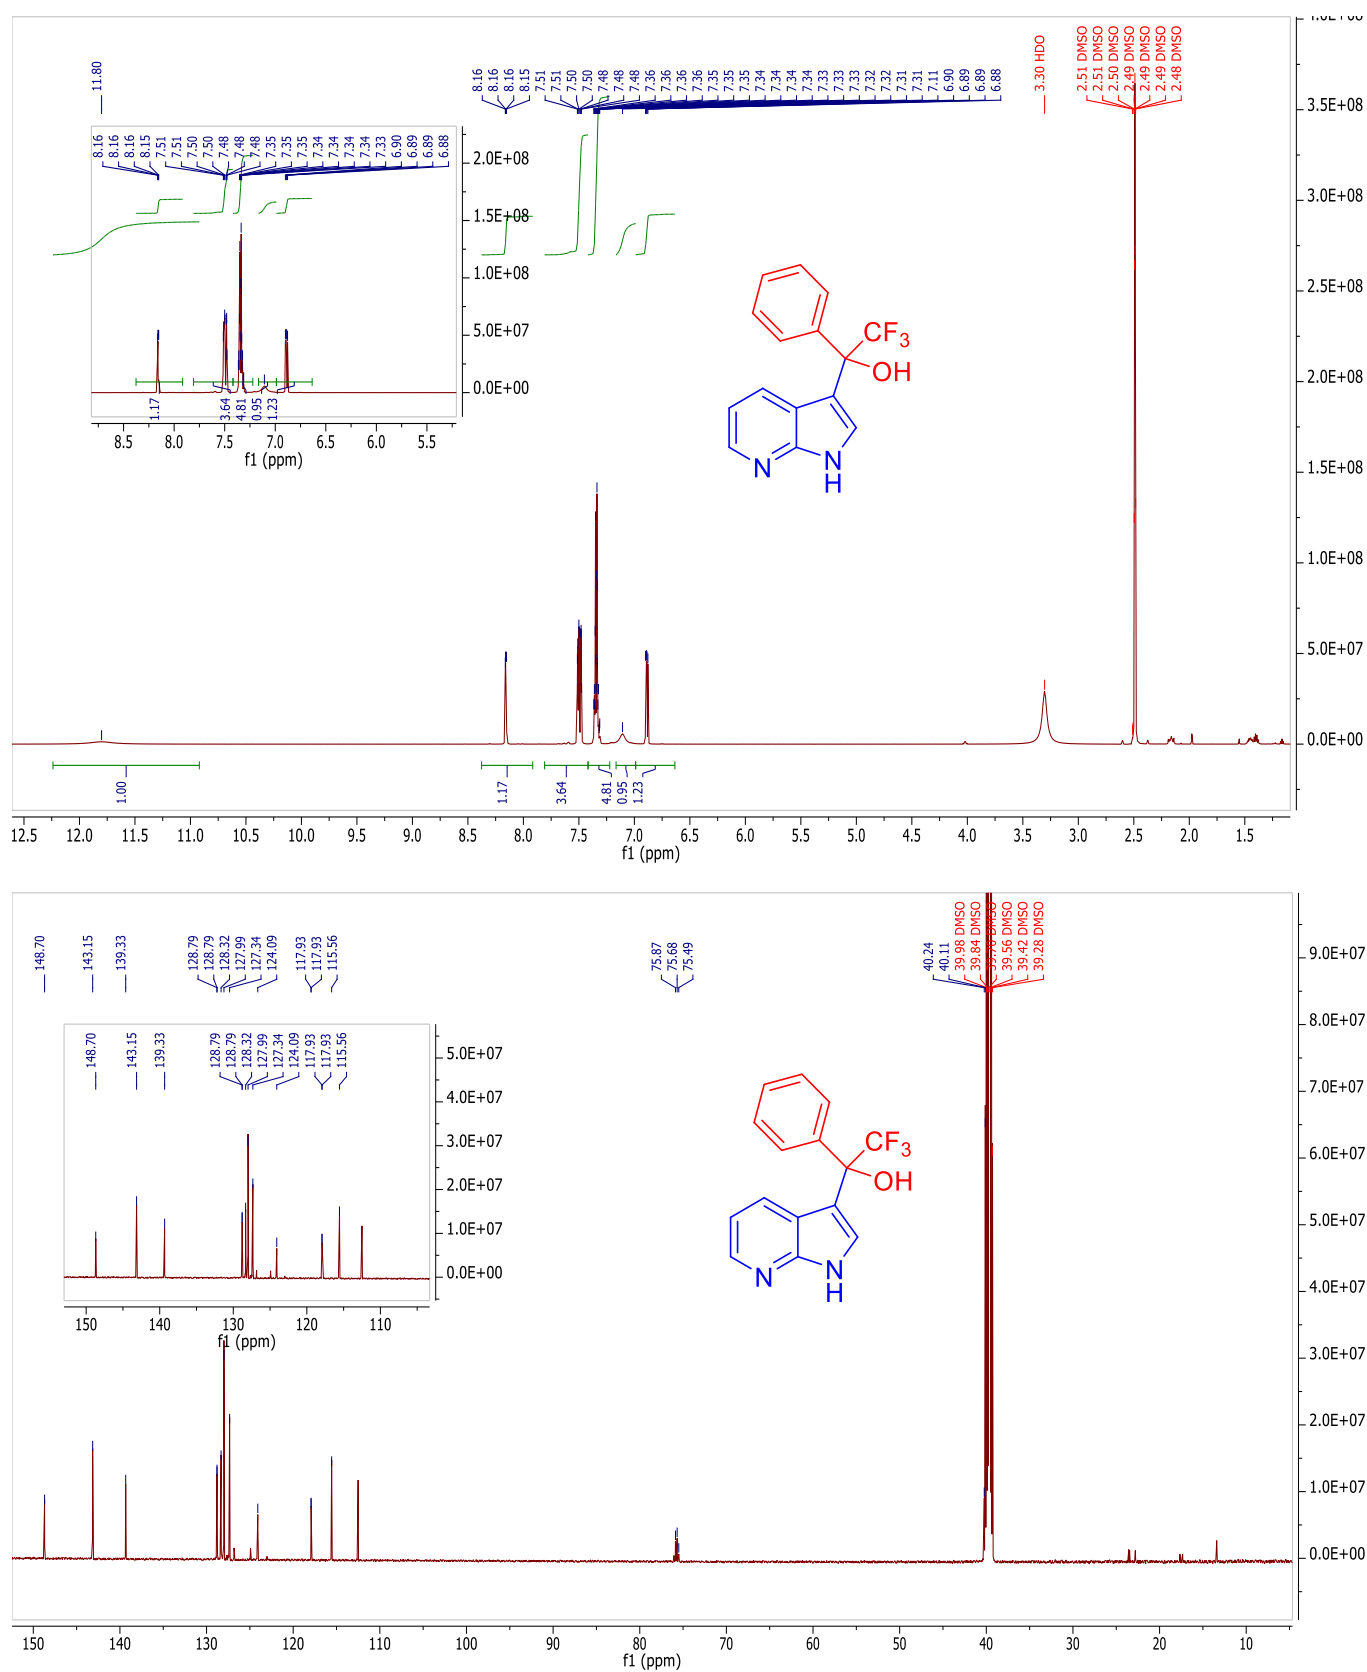

**Figure S22.** <sup>1</sup>H (600 MHz) and <sup>13</sup>C (151 MHz) Spectra of 2,2,2-trifluoro-1-phenyl-1-(1*H*-pyrrolo[2,3-*b*]pyridin-3-yl)ethan-1-ol (**3x**)

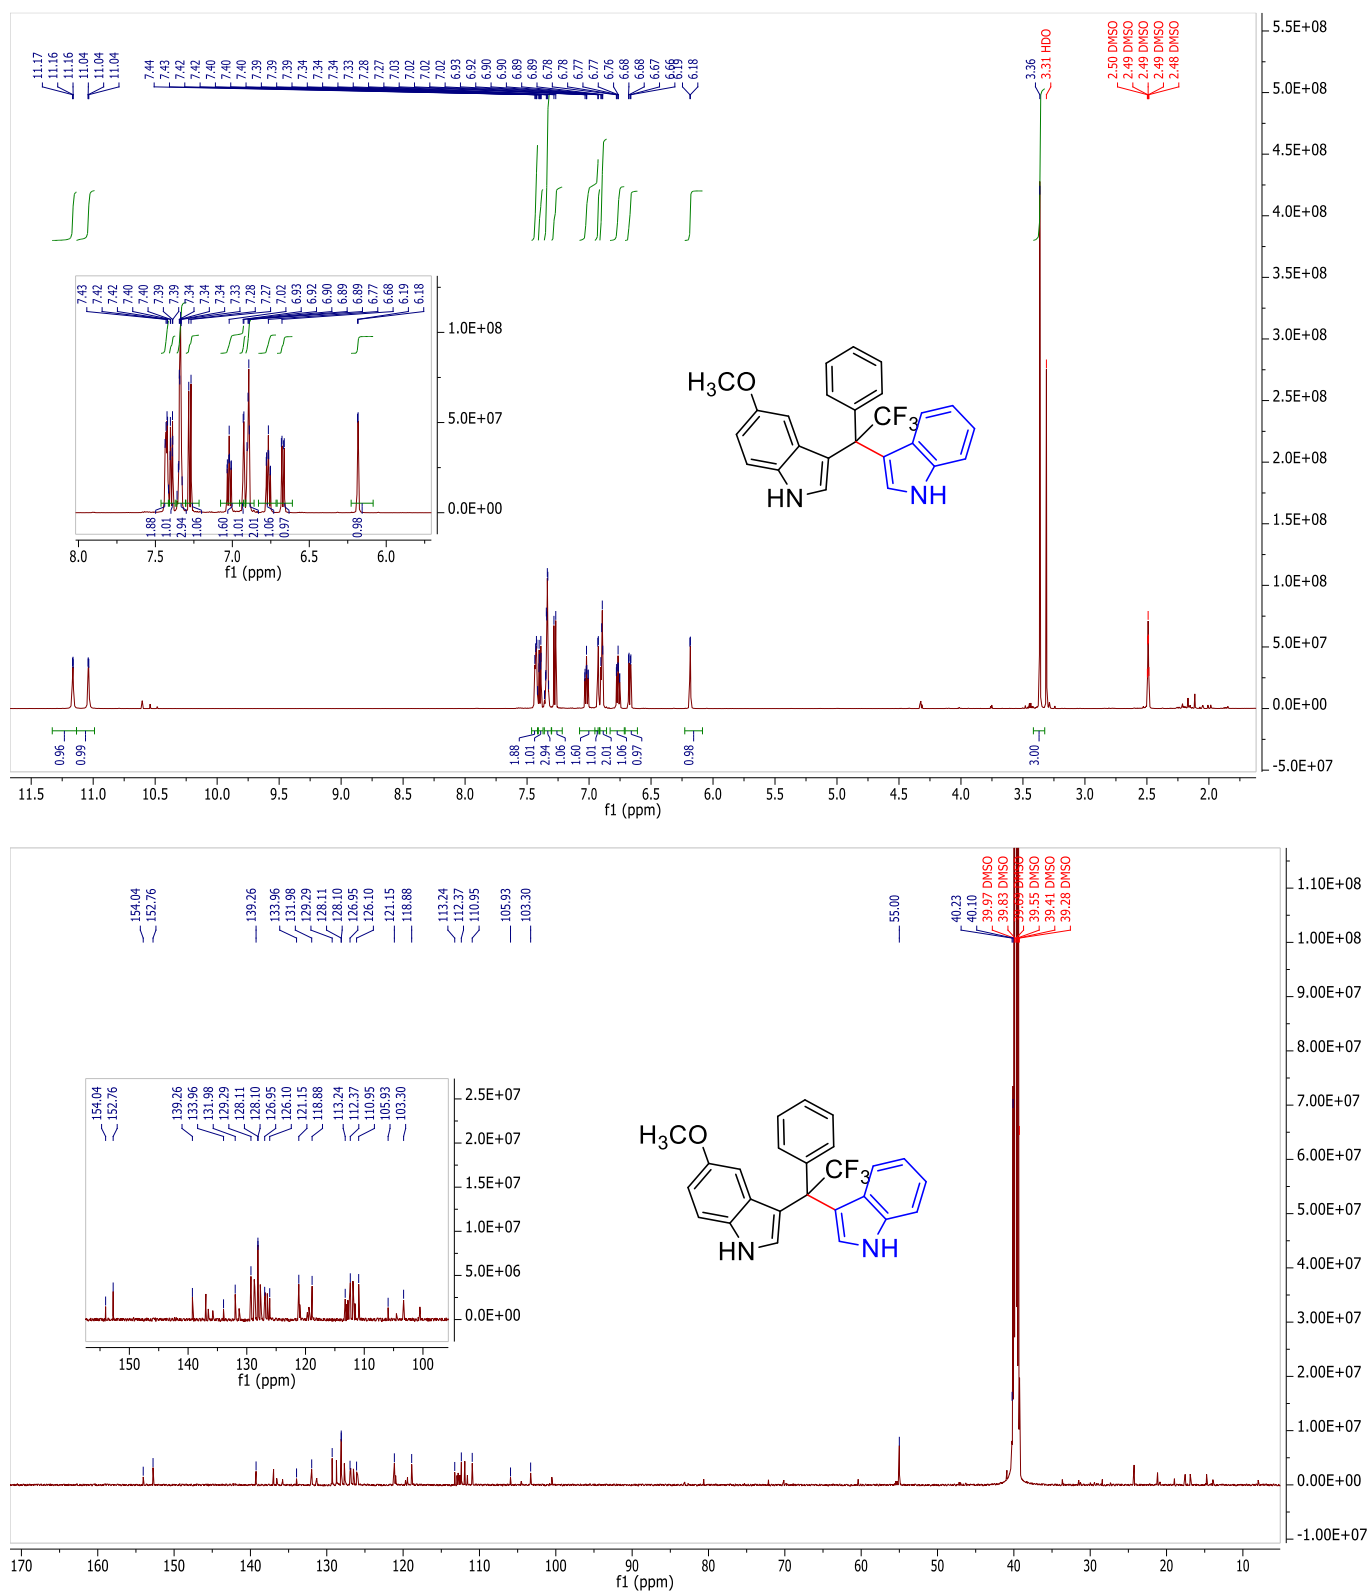

**Figure S23.** <sup>1</sup>H (600 MHz) and <sup>13</sup>C (151 MHz) Spectra of 5-methoxy-3-(2,2,2-trifluoro-1-(1*H*-indol-3-yl)-1-phenylethyl)-1*H*-indole (**9**)

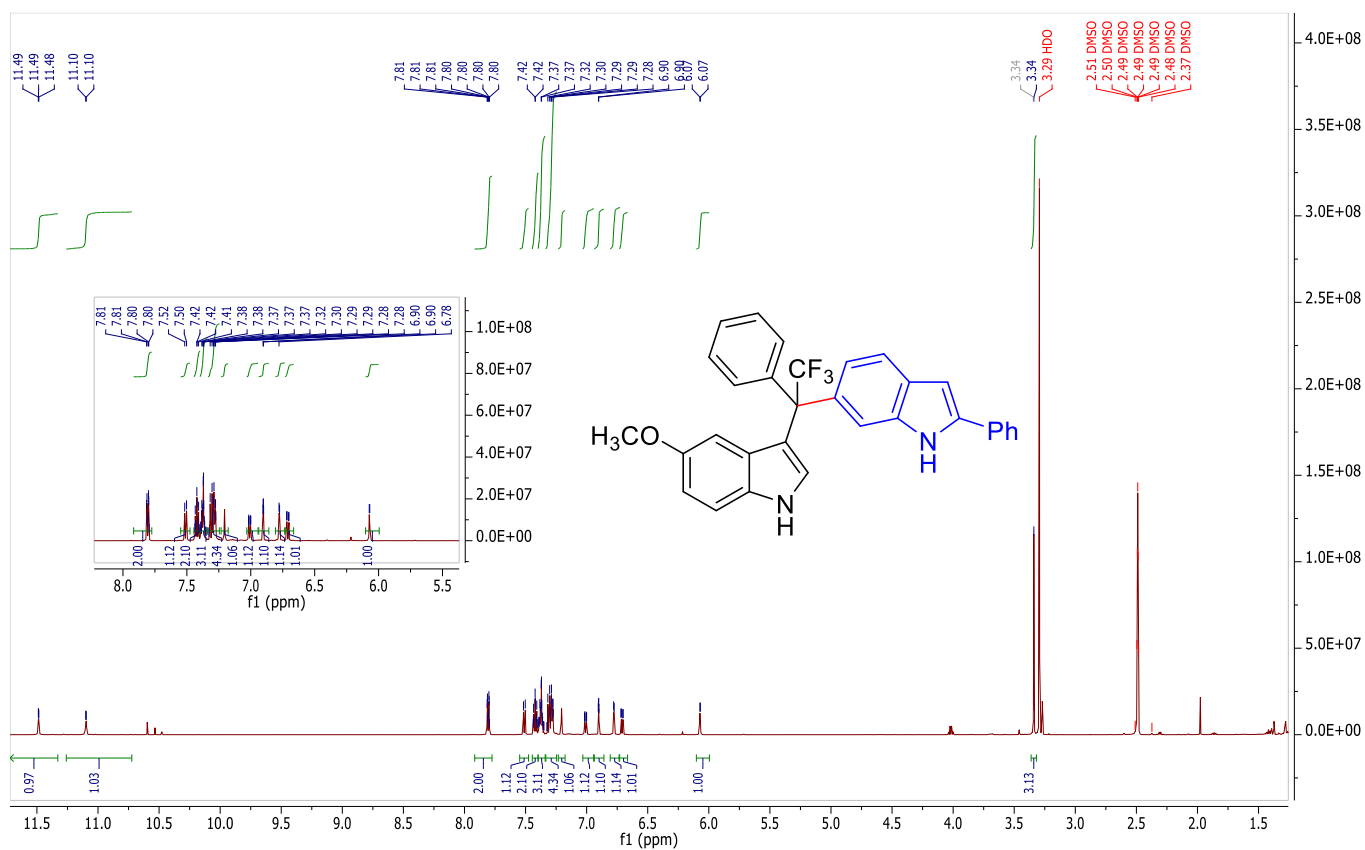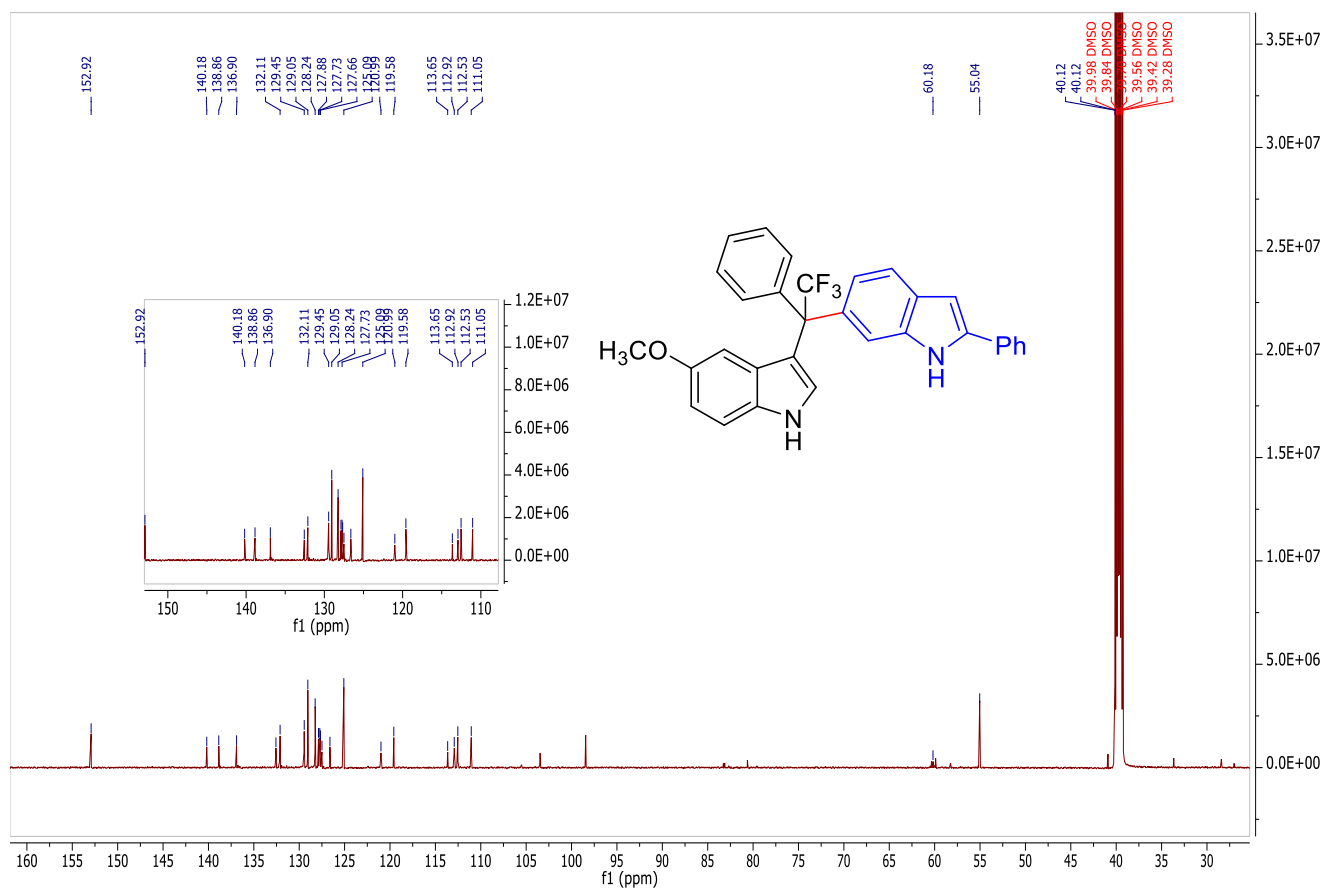

**Figure S24.** <sup>1</sup>H (600 MHz) and <sup>13</sup>C (151 MHz) Spectra of 5-methoxy-3-(2,2,2-trifluoro-1-phenyl-1-(2-phenyl-1*H*-indol-6-yl)ethyl)-1*H*-indole (10)

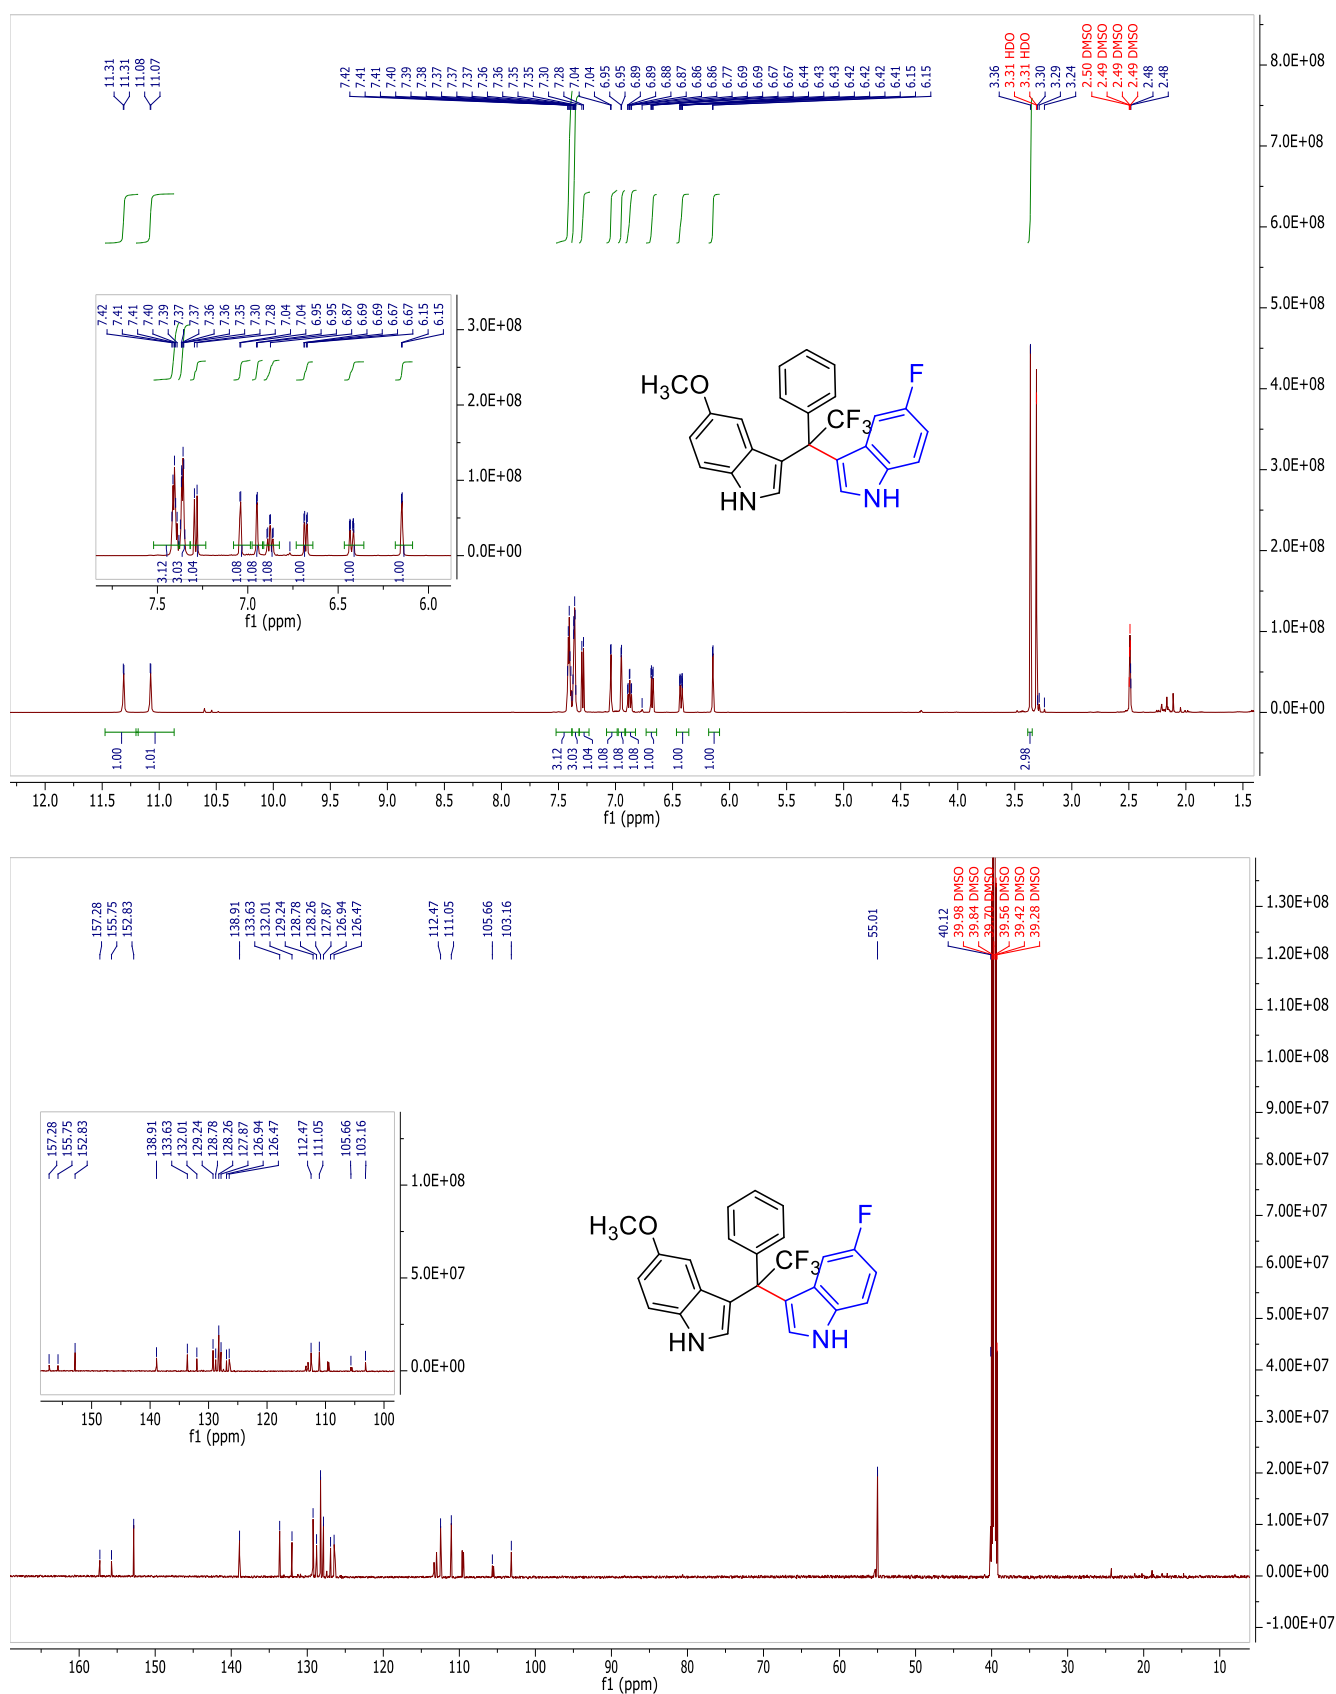

**Figure S25.** <sup>1</sup>H (600 MHz) and <sup>13</sup>C (151 MHz) Spectra of 5-fluoro-3-(2,2,2-trifluoro-1-(5-methoxy-1*H*-indol-3-yl)-1-phenylethyl)-1*H*-indole (**11**)

## References

1. Bandini, M.; Sinisi, R. *Org. Lett.* **2009**, *11*, 2093-2096
2. G. M. Sheldrick, SHELXT – Integrated space-group and crystal-structure determination. *Acta. Cryst. A.* **2015**, *7*, 3-8.
3. G. M. Sheldrick, Crystal structure refinement with SHELXL. *Acta. Cryst. C.* **2015**, *71*, 3-8.
